# Supplementary material for: PAX8 regulon in human ovarian cancer links lineage dependency with epigenetic vulnerability to HDAC inhibitors
Source: eLife journal article supplement (doi:10.7554/elife.44306), 2019-05-03
Supplement: supp [file elife-44306-supp-v1.zip]

Archive with 18 entries (18 files):
- elife_poa_e44306_Figure_1_figure_supplement_2.pdf
- elife_poa_e44306_Figure_2_figure_supplement_2.pdf
- elife_poa_e44306_Figure_1_figure_supplement_4.pdf
- elife_poa_e44306_Figure_2_figure_supplement_1.pdf
- elife_poa_e44306_Figure_1_figure_supplement_5.pdf
- elife_poa_e44306_Figure_4_figure_supplement_1.pdf
- elife_poa_e44306_Supplementary_File_3.xlsx
- elife_poa_e44306_Supplementary_File_2.xlsx
- elife_poa_e44306_Supplementary_File_1.xlsx
- elife_poa_e44306_Figure_1_figure_supplement_3.pdf
- elife_poa_e44306_Figure_3_figure_supplement_1.pdf
- elife_poa_e44306_Figure_6_figure_supplement_1.pdf
- elife_poa_e44306_Figure_3_figure_supplement_2.pdf
- elife_poa_e44306_Figure_4_figure_supplement_2.pdf
- elife_poa_e44306_Figure_1_figure_supplement_1.pdf
- elife_poa_e44306_Transparent_Reporting_File.docx
- elife_poa_e44306_Supplementary_File_5.xlsx
- elife_poa_e44306_Supplementary_File_4.xlsx
