# Supplementary material for: PAX8 regulon in human ovarian cancer links lineage dependency with epigenetic vulnerability to HDAC inhibitors
Source: eLife journal article supplement (doi:10.7554/elife.44306), 2019-05-03
Supplement: supp [file elife-44306-supp-v1.zip › elife_poa_e44306_Supplementary_File_2.xlsx]

## Sheet: Table S2
Supplementary File 2. TMA patient information
TMA	Position	Gender	Age	pathology	Grade	Stage	TNM	Type
OV20810	A1	F	38	Serous papillary adenocarcinoma	1	IV	T3cN1M1	Malignant
OV20810	A2	F	47	Serous papillary adenocarcinoma	1	Ia	T1aN0M0	Malignant
OV20810	A3	F	39	Serous papillary adenocarcinoma	1	Ia	T1aN0M0	Malignant
OV20810	A4	F	71	Serous papillary adenocarcinoma	1	Ia	T1aN0M0	Malignant
OV20810	A5	F	81	Serous papillary adenocarcinoma	1	Ia	T1aN0M0	Malignant
OV20810	A6	F	34	Serous papillary adenocarcinoma	1	Ia	T1aN0M0	Malignant
OV20810	A7	F	51	Serous papillary adenocarcinoma	1	Ia	T1aN0M0	Malignant
OV20810	A8	F	61	Serous adenocarcinoma	2	Ib	T1bN0M0	Malignant
OV20810	A9	F	53	Serous papillary adenocarcinoma	1	IV	T2N0M1	Malignant
OV20810	A10	F	59	Serous papillary adenocarcinoma (fibrous tissue and blood vessel)	-	Ia	T1aN0M0	Malignant
OV20810	A11	F	51	Serous adenocarcinoma (sparse)	1	I	T1N0M0	Malignant
OV20810	A12	F	50	Serous papillary adenocarcinoma	1	Ia	T1aN0M0	Malignant
OV20810	A13	F	48	Serous papillary adenocarcinoma	1	Ia	T1aN0M0	Malignant
OV20810	A14	F	50	Serous papillary adenocarcinoma	1	IIa	T2aN0M0	Malignant
OV20810	A15	F	69	Serous papillary adenocarcinoma	1	IIb	T2bN0M0	Malignant
OV20810	A16	F	56	Serous papillary adenocarcinoma	1	Ia	T1aN0M0	Malignant
OV20810	B1	F	43	Serous papillary adenocarcinoma	1	Ia	T1aN0M0	Malignant
OV20810	B2	F	59	Serous papillary adenocarcinoma	1	I	T1N0M0	Malignant
OV20810	B3	F	57	Serous papillary adenocarcinoma	1	I	T1cN0M0	Malignant
OV20810	B4	F	26	Serous papillary adenocarcinoma	1	Ia	T1aN0M0	Malignant
OV20810	B5	F	58	Serous papillary adenocarcinoma	1	Ia	T1aN0M0	Malignant
OV20810	B6	F	65	Serous papillary adenocarcinoma	1	IIa	T2aN0M0	Malignant
OV20810	B7	F	65	Serous papillary adenocarcinoma	1	Ia	T1aN0M0	Malignant
OV20810	B8	F	41	Serous papillary adenocarcinoma	1	Ia	T1aN0M0	Malignant
OV20810	B9	F	60	Serous papillary adenocarcinoma (fibrous tissue and vessel)	-	Ic	T1cN0M0	Malignant
OV20810	B10	F	57	Serous papillary adenocarcinoma	1	Ib	T1bN0M0	Malignant
OV20810	B11	F	39	Serous papillary adenocarcinoma	1	Ia	T1aN0M0	Malignant
OV20810	B12	F	46	Serous papillary adenocarcinoma	1	IIb	T2bN0M0	Malignant
OV20810	B13	F	34	Mucinous papillary adenocarcinoma	1	I	T1N0M0	Malignant
OV20810	B14	F	40	Mucinous papillary adenocarcinoma	1	Ib	T1bN0M0	Malignant
OV20810	B15	F	49	Mucinous papillary adenocarcinoma	1	Ia	T1aN0M0	Malignant
OV20810	B16	F	58	Mucinous papillary adenocarcinoma	1	Ia	T1aN0M0	Malignant
OV20810	C1	F	45	Mucinous papillary adenocarcinoma (fibrous tissue)	-	Ia	T1aN0M0	Malignant
OV20810	C2	F	51	Mucinous papillary adenocarcinoma	1	Ia	T1aN0M0	Malignant
OV20810	C3	F	42	Mucinous papillary adenocarcinoma	1	Ia	T1aN0M0	Malignant
OV20810	C4	F	42	Mucinous papillary adenocarcinoma	1	Ia	T1aN0M0	Malignant
OV20810	C5	F	48	Mucinous papillary adenocarcinoma	1	Ib	T1bN0M0	Malignant
OV20810	C6	F	46	Mucinous papillary adenocarcinoma	1	Ia	T1aN0M0	Malignant
OV20810	C7	F	55	Mucinous papillary adenocarcinoma	1	Ib	T1bN0M0	Malignant
OV20810	C8	F	23	Mucinous papillary adenocarcinoma	1	Ic	T1cN0M0	Malignant
OV20810	C9	F	61	Mucinous papillary adenocarcinoma	1	Ia	T1aN0M0	Malignant
OV20810	C10	F	34	Mucinous papillary adenocarcinoma	1	Ia	T1aN0M0	Malignant
OV20810	C11	F	25	Mucinous papillary adenocarcinoma	1	Ia	T1aN0M0	Malignant
OV20810	C12	F	34	Mucinous papillary adenocarcinoma	1	Ib	T1bN0M0	Malignant
OV20810	C13	F	42	Mucinous papillary adenocarcinoma	1	Ia	T1aN0M0	Malignant
OV20810	C14	F	52	Serous papillary adenocarcinoma	1	Ic	T1cN0M0	Malignant
OV20810	C15	F	63	Serous papillary adenocarcinoma (mucosa)	-	Ia	T1aN0M0	Malignant
OV20810	C16	F	55	Serous papillary adenocarcinoma	1--2	I	T1N0M0	Malignant
OV20810	D1	F	48	Serous adenocarcinoma (sparse)	-	Ia	T1aN0M0	Malignant
OV20810	D2	F	53	Serous adenocarcinoma	2	Ia	T1aN0M0	Malignant
OV20810	D3	F	41	Serous papillary adenocarcinoma	1--2	Ia	T1aN0M0	Malignant
OV20810	D4	F	52	Serous papillary adenocarcinoma	1--2	Ic	T1cN0M0	Malignant
OV20810	D5	F	55	Serous papillary adenocarcinoma	1--2	I	T1N0M0	Malignant
OV20810	D6	F	46	Serous papillary adenocarcinoma	1--2	Ia	T1aN0M0	Malignant
OV20810	D7	F	40	Serous papillary adenocarcinoma	1--2	IIa	T2aN0M0	Malignant
OV20810	D8	F	54	Serous adenocarcinoma (sparse)	-	IIa	T2aN0M0	Malignant
OV20810	D9	F	47	Serous papillary adenocarcinoma	1--2	Ic	T1cN0M0	Malignant
OV20810	D10	F	56	Serous papillary adenocarcinoma	1--2	Ia	T1aN0M0	Malignant
OV20810	D11	F	50	Serous papillary adenocarcinoma	1--2	II	T2N0M0	Malignant
OV20810	D12	F	33	Serous papillary adenocarcinoma	1--2	I	T1N0M0	Malignant
OV20810	D13	F	48	Serous papillary adenocarcinoma	1--2	I	T1N0M0	Malignant
OV20810	D14	F	68	Serous papillary adenocarcinoma	1--2	Ia	T1aN0M0	Malignant
OV20810	D15	F	63	Mucinous papillary adenocarcinoma	1--2	Ia	T1aN0M0	Malignant
OV20810	D16	F	52	Mucinous papillary adenocarcinoma	1--2	Ia	T1aN0M0	Malignant
OV20810	E1	F	44	Mucinous papillary adenocarcinoma	1--2	Ia	T1aN0M0	Malignant
OV20810	E2	F	46	Mucinous papillary adenocarcinoma	1	IIa	T2aN0M0	Malignant
OV20810	E3	F	29	Mucinous papillary adenocarcinoma (fibrous tissue and blood vessel)	-	IIa	T2aN0M0	Malignant
OV20810	E4	F	48	Mucinous papillary adenocarcinoma	1--2	Ib	T1bN0M0	Malignant
OV20810	E5	F	37	Mucinous papillary adenocarcinoma	1--2	Ia	T1aN0M0	Malignant
OV20810	E6	F	48	Mucinous papillary adenocarcinoma	1--2	I	T1N0M0	Malignant
OV20810	E8	F	66	Serous adenocarcinoma	2	Ic	T1cN0M0	Malignant
OV20810	E9	F	46	Serous adenocarcinoma	2	Ib	T1bN0M0	Malignant
OV20810	E10	F	51	Serous adenocarcinoma	2	IIIc	T3N1M0	Malignant
OV20810	E11	F	47	Serous adenocarcinoma	2	I	T1N0M0	Malignant
OV20810	E12	F	49	Serous adenocarcinoma	2	Ia	T1aN0M0	Malignant
OV20810	E13	F	50	Serous adenocarcinoma	2	Ib	T1bN0M0	Malignant
OV20810	E14	F	48	Serous adenocarcinoma	2	Ia	T1aN0M0	Malignant
OV20810	E15	F	51	Serous adenocarcinoma	2	Ic	T1cN0M0	Malignant
OV20810	E16	F	70	Serous adenocarcinoma	2	Ib	T1bN0M0	Malignant
OV20810	F1	F	59	Serous adenocarcinoma	2	I	T1N0M0	Malignant
OV20810	F2	F	60	Serous adenocarcinoma	2	I	T1N0M0	Malignant
OV20810	F3	F	69	Serous adenocarcinoma	2	IV	T2N0M1	Malignant
OV20810	F4	F	47	Serous adenocarcinoma	2	Ib	T1bN0M0	Malignant
OV20810	F5	F	56	Serous adenocarcinoma	2	Ia	T1aN0M0	Malignant
OV20810	F6	F	54	Serous adenocarcinoma	2	Ia	T1aN0M0	Malignant
OV20810	F7	F	56	Serous adenocarcinoma	2	Ia	T1aN0M0	Malignant
OV20810	F8	F	52	Serous adenocarcinoma	2	Ic	T1cN0M0	Malignant
OV20810	F9	F	67	Serous adenocarcinoma	2	Ic	T1cN0M0	Malignant
OV20810	F10	F	27	Serous adenocarcinoma	2	IIb	T2bN0M0	Malignant
OV20810	F11	F	63	Serous adenocarcinoma	2	Ia	T1aN0M0	Malignant
OV20810	F12	F	54	Serous adenocarcinoma	2	Ia	T1aN0M0	Malignant
OV20810	F13	F	22	Serous adenocarcinoma	2	IIb	T2bN0M0	Malignant
OV20810	F14	F	51	Serous adenocarcinoma	2	IIIc	T3cN1M0	Malignant
OV20810	F15	F	57	Serous adenocarcinoma	2	Ic	T1cN0M0	Malignant
OV20810	F16	F	55	Serous adenocarcinoma	2	Ib	T1bN0M0	Malignant
OV20810	G1	F	37	Serous adenocarcinoma	2	IV	T3N1M1	Malignant
OV20810	G2	F	65	Serous adenocarcinoma	2	Ib	T1bN0M0	Malignant
OV20810	G3	F	58	Serous adenocarcinoma	2	Ia	T1aN0M0	Malignant
OV20810	G4	F	26	Serous adenocarcinoma	2	IIIc	T3cN1M0	Malignant
OV20810	G5	F	32	Serous adenocarcinoma	2	I	T1N0M0	Malignant
OV20810	G6	F	46	Serous adenocarcinoma	2	Ia	T1aN0M0	Malignant
OV20810	G7	F	55	Serous adenocarcinoma	2	I	T1N0M0	Malignant
OV20810	G8	F	52	Serous adenocarcinoma	2	II	T2N0M0	Malignant
OV20810	G9	F	54	Serous adenocarcinoma	2	IIIc	T3cN1M0	Malignant
OV20810	G10	F	44	Serous adenocarcinoma	2	II	T2N0M0	Malignant
OV20810	G11	F	72	Serous adenocarcinoma	2	Ic	T1cN0M0	Malignant
OV20810	G12	F	66	Serous adenocarcinoma	2	IV	T3N0M1	Malignant
OV20810	G13	F	72	Serous adenocarcinoma	2	II	T2N0M0	Malignant
OV20810	G14	F	53	Serous adenocarcinoma	2	I	T1N0M0	Malignant
OV20810	G15	F	54	Serous adenocarcinoma	2	Ia	T1aN0M0	Malignant
OV20810	G16	F	35	Serous adenocarcinoma	2	Ia	T1aN0M0	Malignant
OV20810	H1	F	60	Serous adenocarcinoma	2	Ib	T1bN0M0	Malignant
OV20810	H2	F	51	Serous adenocarcinoma (fibrous tissue and blood vessel)	-	Ia	T1aN0M0	Malignant
OV20810	H3	F	64	Serous adenocarcinoma	2	IV	T3N1M1	Malignant
OV20810	H4	F	58	Serous adenocarcinoma	2	IIIc	T3cN1M0	Malignant
OV20810	H5	F	57	Serous adenocarcinoma	2	IIa	T2aN0M0	Malignant
OV20810	H6	F	47	Serous adenocarcinoma	2	IIa	T2aN0M0	Malignant
OV20810	H7	F	61	Mucinous adenocarcinoma	2	Ia	T1aN0M0	Malignant
OV20810	H8	F	34	Mucinous adenocarcinoma	2	Ib	T1bN0M0	Malignant
OV20810	H9	F	57	Mucinous adenocarcinoma	2	Ib	T1bN0M0	Malignant
OV20810	H10	F	49	Mucinous adenocarcinoma	2	Ia	T1aN0M0	Malignant
OV20810	H11	F	35	Mucinous adenocarcinoma	3	Ib	T1bN0M0	Malignant
OV20810	H12	F	64	Mucinous adenocarcinoma	1	Ia	T1aN0M0	Malignant
OV20810	H13	F	39	Mucinous adenocarcinoma	2	Ib	T1bN0M0	Malignant
OV20810	H14	F	43	Mucinous adenocarcinoma	2	Ib	T1bN0M0	Malignant
OV20810	H15	F	47	Serous adenocarcinoma	2	Ia	T1aN0M0	Malignant
OV20810	H16	F	49	Serous adenocarcinoma	2	II	T2N0M0	Malignant
OV20810	I1	F	58	Serous adenocarcinoma	2	I	T1N0M0	Malignant
OV20810	I2	F	52	Serous adenocarcinoma	2	II	T2N0M0	Malignant
OV20810	I3	F	56	Serous adenocarcinoma	3	II	T2N0M0	Malignant
OV20810	I4	F	53	Serous adenocarcinoma	2	Ic	T1cN0M0	Malignant
OV20810	I5	F	46	Serous adenocarcinoma	2	IIIc	T3aN1M0	Malignant
OV20810	I6	F	70	Serous adenocarcinoma	3	Ib	T1bN0M0	Malignant
OV20810	I7	F	54	Serous adenocarcinoma	2	IV	T3cN1M1	Malignant
OV20810	I8	F	55	Serous adenocarcinoma	2	Ia	T1aN0M0	Malignant
OV20810	I9	F	60	Serous adenocarcinoma	3	Ib	T1bN0M0	Malignant
OV20810	I10	F	40	Serous adenocarcinoma	3	Ic	T1cN0M0	Malignant
OV20810	I12	F	54	Serous adenocarcinoma	2	Ic	T1cN0M0	Malignant
OV20810	I13	F	56	Serous adenocarcinoma	2	Ib	T1bN0M0	Malignant
OV20810	I14	F	47	Serous adenocarcinoma	2	I	T1N0M0	Malignant
OV20810	I15	F	41	Serous adenocarcinoma	2	IIa	T2aN0M0	Malignant
OV20810	I16	F	50	Serous adenocarcinoma	2	III	T3N0M0	Malignant
OV20810	J1	F	64	Serous adenocarcinoma	3	I	T1N0M0	Malignant
OV20810	J2	F	47	Serous adenocarcinoma	3	Ic	T1cN0M0	Malignant
OV20810	J4	F	54	Serous adenocarcinoma	3	IIIc	T3cN0M0	Malignant
OV20810	J5	F	49	Serous adenocarcinoma	3	II	T2N0M0	Malignant
OV20810	J6	F	57	Serous adenocarcinoma	3	Ic	T1cN0M0	Malignant
OV20810	J7	F	57	Serous adenocarcinoma	2	IIIc	T3cN1M0	Malignant
OV20810	J8	F	63	Serous adenocarcinoma	3	II	T2N0M0	Malignant
OV20810	J9	F	49	Serous adenocarcinoma	3	Ia	T1aN0M0	Malignant
OV20810	J10	F	42	Serous adenocarcinoma	3	Ic	T1cN0M0	Malignant
OV20810	J11	F	51	Serous adenocarcinoma	3	II	T2N0M0	Malignant
OV20810	J12	F	47	Serous adenocarcinoma	3	IIIc	T3cN1M0	Malignant
OV20810	J13	F	56	Serous adenocarcinoma	2	Ib	T1bN0M0	Malignant
OV20810	J14	F	51	Serous adenocarcinoma	2	Ib	T1bN0M0	Malignant
OV20810	J15	F	43	Serous adenocarcinoma	3	IV	T2N0M1	Malignant
OV20810	J16	F	65	Serous adenocarcinoma	3	Ia	T1aN0M0	Malignant
OV20810	K1	F	62	Serous adenocarcinoma	3	III	T3N0M0	Malignant
OV20810	K2	F	41	Serous adenocarcinoma	3	Ib	T1bN0M0	Malignant
OV20810	K3	F	54	Serous adenocarcinoma	3	II	T2N0M0	Malignant
OV20810	K4	F	49	Serous adenocarcinoma	3	IIIc	T3N1M0	Malignant
OV20810	K5	F	42	Serous adenocarcinoma	3	IIIc	T3cN1M0	Malignant
OV20810	K6	F	42	Serous adenocarcinoma	3	II	T2N0M0	Malignant
OV20810	K7	F	65	Serous adenocarcinoma	3	II	T2N0M0	Malignant
OV20810	K8	F	46	Serous adenocarcinoma	-	IIIc	T2cN1M0	Malignant
OV20810	K9	F	42	Serous adenocarcinoma	3	Ia	T1aN0M0	Malignant
OV20810	K10	F	55	Serous adenocarcinoma	3	Ic	T1cN0M0	Malignant
OV20810	K11	F	49	Serous adenocarcinoma	3	Ib	T1bN0M0	Malignant
OV20810	K12	F	66	Serous adenocarcinoma	3	IIIc	T3N1M0	Malignant
OV20810	K13	F	65	Serous adenocarcinoma	2	Ia	T1aN0M0	Malignant
OV20810	K14	F	54	Serous adenocarcinoma	3	Ic	T1cN0M0	Malignant
OV20810	K15	F	49	Serous adenocarcinoma	3	I	T1N0M0	Malignant
OV20810	K16	F	55	Serous adenocarcinoma	3	Ib	T1bN0M0	Malignant
OV20810	L1	F	59	Serous adenocarcinoma	3	IV	T3N1M1	Malignant
OV20810	L2	F	57	Serous adenocarcinoma	3	Ia	T1aN0M0	Malignant
OV20810	L3	F	53	Serous adenocarcinoma	3	Ic	T1cN0M0	Malignant
OV20810	L4	F	73	Serous adenocarcinoma (fibrous tissue and blood vessel)	-	Ia	T1aN0M0	Malignant
OV20810	L5	F	72	Serous adenocarcinoma (fibrous tissue and blood vessel)	-	Ia	T1aN0M0	Malignant
OV20810	L6	F	51	Serous adenocarcinoma	3	I	T1N0M0	Malignant
OV20810	L7	F	63	Serous adenocarcinoma	3	Ic	T1cN0M0	Malignant
OV20810	L8	F	45	Serous adenocarcinoma	3	II	T2N0M0	Malignant
OV20810	L9	F	35	Serous adenocarcinoma	3	I	T1N0M0	Malignant
OV20810	L11	F	71	Serous adenocarcinoma	3	Ic	T1cN0M0	Malignant
OV20810	L12	F	42	Serous adenocarcinoma	3	IIIa	T1N1M0	Malignant
OV20810	L13	F	50	Serous adenocarcinoma	3	Ia	T1aN0M0	Malignant
OV20810	L14	F	48	Serous adenocarcinoma	3	Ib	T1bN0M0	Malignant
OV20810	L15	F	70	Serous adenocarcinoma	3	Ia	T1aN0M0	Malignant
OV20810	L16	F	56	Serous adenocarcinoma	3	Ib	T1bN0M0	Malignant
OV20810	M1	F	57	Cancer adjacent normal ovary tissue	-	-	-	NAT
OV20810	M2	F	40	Cancer adjacent normal ovary tissue	-	-	-	NAT
OV20810	M3	F	49	Cancer adjacent normal ovary tissue	-	-	-	NAT
OV20810	M4	F	42	Cancer adjacent normal ovary tissue (fibrous tissue and blood vessel)	-	-	-	NAT
OV20810	M5	F	48	Cancer adjacent normal ovary tissue	-	-	-	NAT
OV20810	M6	F	53	Cancer adjacent normal ovary tissue	-	-	-	NAT
OV20810	M7	F	41	Cancer adjacent normal ovary tissue	-	-	-	NAT
OV20810	M8	F	49	Cancer adjacent normal ovary tissue	-	-	-	NAT
OV20810	M9	F	40	Cancer adjacent normal ovary tissue	-	-	-	NAT
OV20810	M10	F	62	Cancer adjacent normal ovary tissue	-	-	-	NAT
OV20810	M11	F	20	Normal ovary tissue	-	-	-	Normal
OV20810	M12	F	19	Normal ovary tissue	-	-	-	Normal
OV20810	M13	F	34	Normal ovary tissue	-	-	-	Normal
OV20810	M14	F	18	Normal ovary tissue	-	-	-	Normal
OV20810	M15	F	41	Normal ovary tissue	-	-	-	Normal
OV20810	M16	F	27	Normal ovary tissue	-	-	-	Normal
OV20811	A1	F	70	Serous adenocarcinoma	1	Ia	T1aN0M0	Malignant
OV20811	A2	F	24	Serous adenocarcinoma	1	I	T1N0M0	Malignant
OV20811	A4	F	45	Serous papillary adenocarcinoma	2	II	T2N0M0	Malignant
OV20811	A5	F	58	Serous papillary adenocarcinoma	2	Ia	T1aN0M0	Malignant
OV20811	A6	F	66	Mucinous papillary adenocarcinoma	1	Ic	T1cN0M0	Malignant
OV20811	A7	F	60	Mucinous papillary adenocarcinoma (fibrous tissue and blood vessel)	-	Ia	T1aN0M0	Malignant
OV20811	A8	F	69	Mucinous papillary adenocarcinoma	1	Ia	T1aN0M0	Malignant
OV20811	A9	F	39	Mucinous papillary adenocarcinoma	1	Ia	T1aN0M0	Malignant
OV20811	A10	F	52	Mucinous papillary adenocarcinoma	1	Ia	T1aN0M0	Malignant
OV20811	A11	F	19	Mucinous papillary adenocarcinoma	1	IIa	T2aN0M0	Malignant
OV20811	A12	F	47	Serous papillary adenocarcinoma	2	Ic	T1cN0M0	Malignant
OV20811	A13	F	48	Serous papillary adenocarcinoma	2	Ib	T1bN0M0	Malignant
OV20811	A14	F	52	Serous papillary adenocarcinoma	2	IIIc	T3cN1M0	Malignant
OV20811	A15	F	50	Serous papillary adenocarcinoma	2	IIIc	T3N1M0	Malignant
OV20811	A16	F	65	Serous papillary adenocarcinoma	2	IV	T2aN0M1	Malignant
OV20811	B1	F	51	Serous papillary adenocarcinoma	3	Ic	T1cN0M0	Malignant
OV20811	B2	F	66	Serous papillary adenocarcinoma (carcinoma sparse with necrosis)	-	IIIa	T3aN0M0	Malignant
OV20811	B3	F	59	Serous papillary adenocarcinoma	3	Ic	T1cN0M0	Malignant
OV20811	B4	F	54	Serous papillary adenocarcinoma	3	Ib	T1bN0M0	Malignant
OV20811	B5	F	63	Serous papillary adenocarcinoma	2	Ib	T1bN0M0	Malignant
OV20811	B6	F	58	Serous papillary adenocarcinoma	2	IIb	T2bN0M0	Malignant
OV20811	B7	F	52	Serous papillary adenocarcinoma	2	Ia	T1aN0M0	Malignant
OV20811	B8	F	54	Serous papillary adenocarcinoma	3	IIb	T2bN0M0	Malignant
OV20811	B9	F	73	Serous papillary adenocarcinoma	3	Ib	T1bN0M0	Malignant
OV20811	B10	F	37	Mucinous papillary adenocarcinoma	3	Ib	T1bN0M0	Malignant
OV20811	B11	F	68	Mucinous papillary adenocarcinoma	3	Ia	T1aN0M0	Malignant
OV20811	B12	F	46	Mucinous papillary adenocarcinoma	3	IIa	T2aN0M0	Malignant
OV20811	B13	F	36	Mucinous papillary adenocarcinoma	3	Ib	T1bN0M0	Malignant
OV20811	B14	F	51	Serous papillary adenocarcinoma	2	Ia	T1aN0M0	Malignant
OV20811	B15	F	60	Serous papillary adenocarcinoma	2	IIa	T2aN0M0	Malignant
OV20811	B16	F	57	Serous papillary adenocarcinoma	-	Ib	T1bN0M0	Malignant
OV20811	C1	F	64	Serous papillary adenocarcinoma	3	Ia	T1aN0M0	Malignant
OV20811	C2	F	49	Serous papillary adenocarcinoma	2	IIIc	T3cN0M0	Malignant
OV20811	C3	F	56	Serous papillary adenocarcinoma	2--3	II	T2N0M0	Malignant
OV20811	C4	F	32	Mucinous papillary adenocarcinoma	2	I	T1N0M0	Malignant
OV20811	C5	F	51	Mucinous papillary adenocarcinoma (tumoral necrosis)	-	Ib	T1bN0M0	Malignant
OV20811	C6	F	52	Serous papillary adenocarcinoma	3	IIa	T2aN0M0	Malignant
OV20811	C7	F	55	Serous papillary adenocarcinoma	3	IV	T3cN1M1	Malignant
OV20811	C8	F	54	Serous papillary adenocarcinoma	3	IV	T2aN0M1	Malignant
OV20811	C9	F	56	Serous papillary adenocarcinoma	2	Ib	T1bN0M0	Malignant
OV20811	C10	F	57	Serous papillary adenocarcinoma	2--3	Ia	T1aN0M0	Malignant
OV20811	C11	F	52	Serous papillary adenocarcinoma (fibrous tissue and blood vessel)	-	IIIc	T3cN1M0	Malignant
OV20811	C12	F	48	Serous papillary adenocarcinoma	3	IV	T3cN1M0	Malignant
OV20811	C13	F	48	Mucinous papillary adenocarcinoma	3	IIIc	T3cN0M0	Malignant
OV20811	C14	F	51	Serous papillary adenocarcinoma	3	Ia	T1aN0M0	Malignant
OV20811	C15	F	52	Serous papillary adenocarcinoma	3	Ia	T1aN0M0	Malignant
OV20811	C16	F	62	Serous papillary adenocarcinoma	-	Ia	T1aN0M0	Malignant
OV20811	D1	F	54	Serous papillary adenocarcinoma	1	IIIb	T3bN0M0	Malignant
OV20811	D2	F	52	Serous papillary adenocarcinoma	3	Ia	T1aN0M0	Malignant
OV20811	D3	F	57	Serous papillary adenocarcinoma	3	IIb	T2bN0M0	Malignant
OV20811	D4	F	69	Serous adenocarcinoma	2	II	T2N0M0	Malignant
OV20811	D5	F	48	Serous papillary adenocarcinoma	3	Ia	T1aN0M0	Malignant
OV20811	D6	F	60	Serous papillary adenocarcinoma	2	Ia	T1aN0M0	Malignant
OV20811	D7	F	65	Serous papillary adenocarcinoma	3	IIa	T2aN0M0	Malignant
OV20811	D8	F	37	Mucinous papillary adenocarcinoma	3	Ia	T1aN0M0	Malignant
OV20811	D9	F	39	Serous papillary adenocarcinoma	3	II	T2N0M0	Malignant
OV20811	D10	F	56	Serous adenocarcinoma	2	IIIc	T3N1M0	Malignant
OV20811	D11	F	39	Serous papillary adenocarcinoma	3	Ib	T1bN0M0	Malignant
OV20811	D12	F	32	Serous papillary adenocarcinoma	3	IIIc	T3cN0M0	Malignant
OV20811	D13	F	48	Mucinous papillary adenocarcinoma with necrosis	3	Ia	T1aN0M0	Malignant
OV20811	D14	F	36	Serous papillary adenocarcinoma	3	IIa	T2aN0M0	Malignant
OV20811	D15	F	55	Serous papillary adenocarcinoma	3	Ia	T1aN0M0	Malignant
OV20811	D16	F	48	Serous papillary adenocarcinoma	-	IIa	T2aN0M0	Malignant
OV20811	E1	F	54	Serous adenocarcinoma	3	Ia	T1aN0M0	Malignant
OV20811	E2	F	45	Serous papillary adenocarcinoma	3	Ia	T1aN0M0	Malignant
OV20811	E3	F	42	Serous papillary adenocarcinoma	3	II	T2N0M0	Malignant
OV20811	E4	F	55	Serous papillary adenocarcinoma	3	Ib	T1bN0M0	Malignant
OV20811	E5	F	52	Serous papillary adenocarcinoma	3	Ic	T1cN0M0	Malignant
OV20811	E6	F	58	Serous papillary adenocarcinoma	2	Ia	T1aN0M0	Malignant
OV20811	E7	F	47	Mucinous papillary adenocarcinoma	3	Ia	T1aN0M0	Malignant
OV20811	E8	F	29	Mucinous papillary adenocarcinoma (corpus albicans tissue)	-	Ib	T1bN0M0	Malignant
OV20811	E9	F	53	Serous papillary adenocarcinoma (fibrous tissue)	-	Ia	T1aN0M0	Malignant
OV20811	E10	F	57	Serous papillary adenocarcinoma	3	III	T3N0M0	Malignant
OV20811	E11	F	52	Serous papillary adenocarcinoma (ovary tissue)	-	Ic	T1cN0M0	Malignant
OV20811	E12	F	53	Serous papillary adenocarcinoma	3	IIa	T2aN0M0	Malignant
OV20811	E13	F	48	Serous papillary adenocarcinoma	3	IIa	T2aN0M0	Malignant
OV20811	E14	F	59	Serous papillary adenocarcinoma	3	IIb	T2bN0M0	Malignant
OV20811	E15	F	44	Mucinous papillary adenocarcinoma with necrosis	3	II	T2N0M0	Malignant
OV20811	E16	F	48	Serous papillary adenocarcinoma	3	Ib	T1bN0M0	Malignant
OV20811	F1	F	51	Serous papillary adenocarcinoma	3	Ib	T1bN0M0	Malignant
OV20811	F2	F	51	Serous papillary adenocarcinoma (ovary tissue)	-	II	T2N0M0	Malignant
OV20811	F3	F	70	Serous papillary adenocarcinoma	3	Ia	T1aN0M0	Malignant
OV20811	F4	F	59	Serous papillary adenocarcinoma (chronic inflammation of fibrous tissue and blood vessel)	-	Ia	T1aN0M0	Malignant
OV20811	F5	F	60	Serous papillary adenocarcinoma	3	Ib	T1bN0M0	Malignant
OV20811	F6	F	60	Serous papillary adenocarcinoma	3	I	T1N0M0	Malignant
OV20811	F7	F	49	Serous papillary adenocarcinoma	3	Ia	T1aN0M0	Malignant
OV20811	F8	F	60	Serous papillary adenocarcinoma with necrosis	3	I	T1N0M0	Malignant
OV20811	F9	F	40	Serous papillary adenocarcinoma	2	I	T1N0M0	Malignant
OV20811	F10	F	56	Serous papillary adenocarcinoma	3	II	T2N0M0	Malignant
OV20811	F11	F	57	Serous papillary adenocarcinoma	3	Ic	T1cN0M0	Malignant
OV20811	F12	F	39	Mucinous papillary adenocarcinoma with necrosis	3	Ib	T1bN0M0	Malignant
OV20811	F14	F	41	Serous papillary adenocarcinoma	3	I	T1N0M0	Malignant
OV20811	F15	F	60	Serous papillary adenocarcinoma	3	Ia	T1aN0M0	Malignant
OV20811	F16	F	62	Mucinous papillary adenocarcinoma	3	Ib	T1bN0M0	Malignant
OV20811	G1	F	41	Mucinous adenocarcinoma	3	IIa	T2aN0M0	Malignant
OV20811	G2	F	41	Mucinous adenocarcinoma	3	Ib	T1bN0M0	Malignant
OV20811	G6	F	54	Endometrioid adenocarcinoma	1	Ib	T1bN0M0	Malignant
OV20811	G7	F	60	Endometrioid adenocarcinoma (tumoral necrosis)	-	II	T2N0M0	Malignant
OV20811	G8	F	46	Endometrioid adenocarcinoma	1	II	T2N0M0	Malignant
OV20811	G9	F	65	Endometrioid adenocarcinoma (tumoral necrosis)	-	Ic	T1cN0M0	Malignant
OV20811	G10	F	50	Endometrioid adenocarcinoma	1	Ia	T1aN0M0	Malignant
OV20811	G11	F	47	Endometrioid adenocarcinoma (sparse)	1	IIa	T2aN0M0	Malignant
OV20811	G12	F	69	Endometrioid adenocarcinoma	1	Ia	T1aN0M0	Malignant
OV20811	G13	F	55	Endometrioid adenocarcinoma	1	I	T1N0M0	Malignant
OV20811	G14	F	49	Endometrioid adenocarcinoma	1	I	T1N0M0	Malignant
OV20811	G15	F	44	Endometrioid adenocarcinoma	1	Ib	T1bN0M0	Malignant
OV20811	G16	F	43	Endometrioid adenocarcinoma	1	Ia	T1aN0M0	Malignant
OV20811	H1	F	50	Endometrioid adenocarcinoma	1	IIa	T2aN0M0	Malignant
OV20811	H2	F	53	Endometrioid adenocarcinoma	1	I	T1N0M0	Malignant
OV20811	H3	F	70	Endometrioid adenocarcinoma	1	Ia	T1aN0M0	Malignant
OV20811	H4	F	55	Endometrioid adenocarcinoma	3	I	T1N0M0	Malignant
OV20811	H5	F	51	Endometrioid adenocarcinoma	2	Ia	T1aN0M0	Malignant
OV20811	H6	F	41	Endometrioid adenocarcinoma	2	I	T1N0M0	Malignant
OV20811	H7	F	39	Endometrioid adenocarcinoma	3	IIa	T2aN0M0	Malignant
OV20811	H8	F	59	Endometrioid adenocarcinoma	3	IV	T2N0M1	Malignant
OV20811	H9	F	47	Endometrioid adenocarcinoma	2	Ic	T1cN0M0	Malignant
OV20811	H10	F	68	Endometrioid adenocarcinoma	2	IIc	T2cN0M0	Malignant
OV20811	H11	F	38	Endometrioid adenocarcinoma	3	Ia	T1aN0M0	Malignant
OV20811	H12	F	47	Endometrioid adenocarcinoma	3	Ic	T1cN0M0	Malignant
OV20811	H13	F	60	Endometrioid adenocarcinoma	3	Ib	T1bN0M0	Malignant
OV20811	H14	F	53	Endometrioid adenocarcinoma	3	IIa	T2aN0M0	Malignant
OV20811	H15	F	49	Clear cell carcinoma	-	I	T1N0M0	Malignant
OV20811	H16	F	49	Clear cell carcinoma	-	I	T1N0M0	Malignant
OV20811	I1	F	45	Clear cell carcinoma (sparse) with massive necrosis	-	IIIc	T1N1M0	Malignant
OV20811	I2	F	50	Clear cell carcinoma (sparse) with necrosis	-	I	T1N0M0	Malignant
OV20811	I3	F	42	Clear cell carcinoma	-	I	T1N0M0	Malignant
OV20811	I4	F	40	Clear cell carcinoma	-	I	T1N0M0	Malignant
OV20811	I5	F	48	Clear cell carcinoma (tumoral necrosis)	-	II	T2N0M0	Malignant
OV20811	I6	F	42	Clear cell carcinoma	-	Ic	T1cN0M0	Malignant
OV20811	I7	F	43	Clear cell carcinoma	-	I	T1N0M0	Malignant
OV20811	I8	F	39	Clear cell carcinoma	-	I	T1N0M0	Malignant
OV20812	A1	F	34	Serous adenocarcinoma	1	Ia	T1aN0M0	Malignant
OV20812	A2	F	39	Serous papillary adenocarcinoma	3	I	T1N0M0	Malignant
OV20812	A3	F	51	Serous adenocarcinoma	1	I	T1N0M0	Malignant
OV20812	A4	F	48	Serous papillary adenocarcinoma	1	I	T1N0M0	Malignant
OV20812	A5	F	29	Serous papillary adenocarcinoma	1	I	T1N0M0	Malignant
OV20812	A6	F	56	Mucinous papillary adenocarcinoma	2	Ic	T1cN0M0	Malignant
OV20812	A7	F	68	Serous papillary adenocarcinoma	1	IIIc	T3cN0M0	Malignant
OV20812	A8	F	35	Serous papillary adenocarcinoma	1	I	T1N0M0	Malignant
OV20812	A9	F	36	Serous papillary adenocarcinoma	1	IIa	T2aN0M0	Malignant
OV20812	A10	F	37	Serous papillary adenocarcinoma	1	I	T1N0M0	Malignant
OV20812	A11	F	27	Serous papillary adenocarcinoma	1	Ia	T1aN0M0	Malignant
OV20812	A12	F	34	Serous papillary adenocarcinoma	1	Ib	T1bN0M0	Malignant
OV20812	A13	F	39	Serous papillary adenocarcinoma	1	I	T1N0M0	Malignant
OV20812	A14	F	49	Mucinous papillary adenocarcinoma	1	I	T1N0M0	Malignant
OV20812	A15	F	47	Mucinous papillary adenocarcinoma	1	Ia	T1aN0M0	Malignant
OV20812	A16	F	69	Mucinous papillary adenocarcinoma	1	Ib	T1bN0M0	Malignant
OV20812	B1	F	20	Mucinous papillary adenocarcinoma	1	Ic	T1cN0M0	Malignant
OV20812	B2	F	52	Mucinous papillary adenocarcinoma	1	I	T1N0M0	Malignant
OV20812	B3	F	52	Mucinous papillary adenocarcinoma	1	I	T1aN0M0	Malignant
OV20812	B4	F	21	Mucinous papillary adenocarcinoma	1	Ia	T1aN0M0	Malignant
OV20812	B5	F	25	Mucinous papillary adenocarcinoma	1	Ia	T1aN0M0	Malignant
OV20812	B6	F	47	Serous papillary adenocarcinoma (ovary tissue)	-	II	T2N0M0	Malignant
OV20812	B7	F	34	Serous papillary adenocarcinoma	1	Ic	T1cN0M0	Malignant
OV20812	B8	F	51	Serous papillary adenocarcinoma	1	Ia	T1aN0M0	Malignant
OV20812	B9	F	55	Serous papillary adenocarcinoma	1	Ia	T1aN0M0	Malignant
OV20812	B10	F	29	Serous papillary adenocarcinoma	1	I	T1N0M0	Malignant
OV20812	B11	F	59	Serous papillary adenocarcinoma	1	IIIa	T3aN0M0	Malignant
OV20812	B12	F	64	Serous papillary adenocarcinoma	2	I	T1N0M0	Malignant
OV20812	B13	F	67	Serous papillary adenocarcinoma	1	I	T1N0M0	Malignant
OV20812	B14	F	26	Mucinous papillary adenocarcinoma	1	I	T1N0M0	Malignant
OV20812	B15	F	30	Serous papillary adenocarcinoma	1	Ia	T1aN0M0	Malignant
OV20812	B16	F	56	Serous papillary adenocarcinoma	3	I	T1N0M0	Malignant
OV20812	C1	F	39	Serous adenocarcinoma	2	I	T1N0M0	Malignant
OV20812	C2	F	58	Serous adenocarcinoma	3	Ia	T1aN0M0	Malignant
OV20812	C3	F	79	Serous adenocarcinoma	3	Ia	T1aN0M0	Malignant
OV20812	C4	F	61	Serous papillary adenocarcinoma	2	I	T1N0M0	Malignant
OV20812	C5	F	48	Serous papillary adenocarcinoma	3	I	T1N0M0	Malignant
OV20812	C6	F	60	Serous papillary adenocarcinoma	3	I	T1N0M0	Malignant
OV20812	C7	F	58	Serous papillary adenocarcinoma	2	I	T1N0M0	Malignant
OV20812	C8	F	47	Serous papillary adenocarcinoma	2	I	T1N0M0	Malignant
OV20812	C9	F	72	Serous papillary adenocarcinoma	2	Ia	T1aN0M0	Malignant
OV20812	C10	F	50	Serous papillary adenocarcinoma	2	I	T1N0M0	Malignant
OV20812	C11	F	40	Serous papillary adenocarcinoma	3	Ia	T1aN0M0	Malignant
OV20812	C12	F	48	Serous papillary adenocarcinoma	2	I	T1N0M0	Malignant
OV20812	C13	F	55	Serous papillary adenocarcinoma	2	I	T1N0M0	Malignant
OV20812	C14	F	49	Serous papillary adenocarcinoma	2	I	T1N0M0	Malignant
OV20812	C15	F	30	Serous papillary adenocarcinoma	2	I	T1N0M0	Malignant
OV20812	C16	F	57	Serous papillary adenocarcinoma	2	I	T1N0M0	Malignant
OV20812	D1	F	43	Serous papillary adenocarcinoma	2	IIIc	T2bN1M0	Malignant
OV20812	D2	F	58	Serous papillary adenocarcinoma	2	I	T1N0M0	Malignant
OV20812	D3	F	49	Serous papillary adenocarcinoma	2	I	T1N0M0	Malignant
OV20812	D4	F	40	Serous papillary adenocarcinoma	2	Ia	T1aN0M0	Malignant
OV20812	D5	F	43	Serous papillary adenocarcinoma	3	I	T1N0M0	Malignant
OV20812	D6	F	19	Serous papillary adenocarcinoma	3	I	T1N0M0	Malignant
OV20812	D7	F	51	Serous papillary adenocarcinoma	2	I	T1N0M0	Malignant
OV20812	D8	F	49	Serous papillary adenocarcinoma	1	I	T1N0M0	Malignant
OV20812	D9	F	53	Serous papillary adenocarcinoma	1	I	T1N0M0	Malignant
OV20812	D10	F	52	Serous papillary adenocarcinoma	1	I	T1N0M0	Malignant
OV20812	D11	F	63	Serous papillary adenocarcinoma	2	IIb	T2bN0M0	Malignant
OV20812	D12	F	34	Mucinous papillary adenocarcinoma	1	I	T1N0M0	Malignant
OV20812	D13	F	49	Serous papillary adenocarcinoma	2	I	T1N0M0	Malignant
OV20812	D14	F	70	Mucinous papillary adenocarcinoma	2	Ia	T1aN0M0	Malignant
OV20812	D15	F	56	Mucinous papillary adenocarcinoma	1	III	T3N0M0	Malignant
OV20812	D16	F	53	Mucinous papillary adenocarcinoma	2	I	T1N0M0	Malignant
OV20812	E1	F	40	Mucinous papillary adenocarcinoma	2	Ic	T1cN0M0	Malignant
OV20812	E3	F	54	Mucinous papillary adenocarcinoma	1	I	T1N0M0	Malignant
OV20812	E4	F	44	Mucinous papillary adenocarcinoma	2	I	T1N0M0	Malignant
OV20812	E5	F	42	Mucinous papillary adenocarcinoma	2	I	T1N0M0	Malignant
OV20812	E6	F	41	Mucinous papillary adenocarcinoma	2	IIa	T2aN0M0	Malignant
OV20812	E7	F	24	Mucinous papillary adenocarcinoma	2	III	T3N0M0	Malignant
OV20812	E8	F	47	Mucinous papillary adenocarcinoma	2	II	T2N0M0	Malignant
OV20812	E9	F	24	Mucinous papillary adenocarcinoma	1	I	T1N0M0	Malignant
OV20812	E10	F	56	Mucinous papillary adenocarcinoma	2	I	T1N0M0	Malignant
OV20812	E11	F	64	Mucinous papillary adenocarcinoma	1	I	T1N0M0	Malignant
OV20812	E12	F	51	Serous papillary adenocarcinoma	3	I	T1N0M0	Malignant
OV20812	E13	F	44	Serous papillary adenocarcinoma	3	I	T1N0M0	Malignant
OV20812	E14	F	48	Serous papillary adenocarcinoma	3	I	T1N0M0	Malignant
OV20812	E15	F	41	Serous papillary adenocarcinoma	3	Ib	T1bN0M0	Malignant
OV20812	E16	F	56	Serous papillary adenocarcinoma	3	IV	T3cN0M1	Malignant
OV20812	F1	F	40	Serous papillary adenocarcinoma	3	I	T1N0M0	Malignant
OV20812	F2	F	62	Serous papillary adenocarcinoma	3	I	T1N0M0	Malignant
OV20812	F3	F	57	Serous papillary adenocarcinoma	3	IIa	T2aN0M0	Malignant
OV20812	F4	F	52	Serous papillary adenocarcinoma	3	I	T1N0M0	Malignant
OV20812	F5	F	67	Serous papillary adenocarcinoma	3	I	T1N0M0	Malignant
OV20812	F6	F	46	Serous papillary adenocarcinoma	3	I	T1N0M0	Malignant
OV20812	F7	F	42	Serous papillary adenocarcinoma	3	Ib	T1bN0M0	Malignant
OV20812	F8	F	58	Serous papillary adenocarcinoma	2	III	T3N0M0	Malignant
OV20812	F9	F	65	Serous papillary adenocarcinoma	3	Ia	T1aN0M0	Malignant
OV20812	F10	F	48	Serous papillary adenocarcinoma	3	I	T1N0M0	Malignant
OV20812	F11	F	71	Serous papillary adenocarcinoma	3	I	T1N0M0	Malignant
OV20812	F12	F	56	Serous papillary adenocarcinoma	3	I	T1N0M0	Malignant
OV20812	F13	F	35	Serous papillary adenocarcinoma	3	Ib	T1bN0M0	Malignant
OV20812	F14	F	48	Serous papillary adenocarcinoma	3	Ib	T1bN0M0	Malignant
OV20812	F15	F	63	Serous papillary adenocarcinoma	3	IIIc	T2N1M0	Malignant
OV20812	F16	F	46	Serous papillary adenocarcinoma	3	I	T1N0M0	Malignant
OV20812	G1	F	60	Serous papillary adenocarcinoma	3	I	T1N0M0	Malignant
OV20812	G2	F	44	Serous papillary adenocarcinoma	3	I	T1N0M0	Malignant
OV20812	G3	F	41	Serous papillary adenocarcinoma	3	Ic	T1cN0M0	Malignant
OV20812	G4	F	49	Serous papillary adenocarcinoma	2	I	T1N0M0	Malignant
OV20812	G5	F	55	Serous papillary adenocarcinoma	3	Ia	T1aN0M0	Malignant
OV20812	G6	F	49	Serous papillary adenocarcinoma	3	I	T1N0M0	Malignant
OV20812	G7	F	42	Serous papillary adenocarcinoma with necrosis	3	I	T1N0M0	Malignant
OV20812	G8	F	51	Serous papillary adenocarcinoma	3	IIa	T2aN0M0	Malignant
OV20812	G9	F	29	Serous papillary adenocarcinoma (tumoral necrosis)	-	I	T1N0M0	Malignant
OV20812	G10	F	56	Serous papillary adenocarcinoma	2	IIIc	T2N1M0	Malignant
OV20812	G11	F	34	Serous papillary adenocarcinoma	3	I	T1N0M0	Malignant
OV20812	G12	F	64	Serous papillary adenocarcinoma	3	IIIc	T3cN1M0	Malignant
OV20812	G13	F	47	Serous papillary adenocarcinoma	3	I	T1N0M0	Malignant
OV20812	G14	F	42	Serous papillary adenocarcinoma	3	Ib	T1bN0M0	Malignant
OV20812	G15	F	51	Serous adenocarcinoma (sparse)	3	I	T1N0M0	Malignant
OV20812	G16	F	44	Serous papillary adenocarcinoma	3	I	T1N0M0	Malignant
OV20812	H1	F	53	Serous papillary adenocarcinoma	3	I	T1N0M0	Malignant
OV20812	H2	F	42	Serous papillary adenocarcinoma	2	I	T1N0M0	Malignant
OV20812	H3	F	26	Serous papillary adenocarcinoma	3	I	T1N0M0	Malignant
OV20812	H4	F	38	Serous papillary adenocarcinoma	3	Ia	T1aN0M0	Malignant
OV20812	H5	F	61	Serous papillary adenocarcinoma	3	Ia	T1aN0M0	Malignant
OV20812	H6	F	36	Serous papillary adenocarcinoma	3	Ia	T1aN0M0	Malignant
OV20812	H7	F	64	Serous papillary adenocarcinoma	3	I	T1N0M0	Malignant
OV20812	H8	F	44	Serous papillary adenocarcinoma	3	Ic	T1cN0M0	Malignant
OV20812	H9	F	47	Serous papillary adenocarcinoma	3	I	T1N0M0	Malignant
OV20812	H10	F	52	Serous papillary adenocarcinoma	3	Ia	T1aN0M0	Malignant
OV20812	H11	F	39	Serous papillary adenocarcinoma	3	I	T1N0M0	Malignant
OV20812	H12	F	47	Serous papillary adenocarcinoma	-	Ia	T1aN0M0	Malignant
OV20812	H13	F	65	Serous papillary adenocarcinoma	3	I	T1N0M0	Malignant
OV20812	H14	F	45	Serous papillary adenocarcinoma	3	I	T1N0M0	Malignant
OV20812	H15	F	43	Serous papillary adenocarcinoma	3	II	T2N0M0	Malignant
OV20812	H16	F	70	Serous papillary adenocarcinoma	3	I	T1N0M0	Malignant
OV20812	I1	F	49	Serous papillary adenocarcinoma	3	IIIc	T3bN1M0	Malignant
OV20812	I2	F	38	Serous papillary adenocarcinoma	3	IIa	T2aN0M0	Malignant
OV20812	I3	F	37	Serous papillary adenocarcinoma	3	I	T1N0M0	Malignant
OV20812	I4	F	58	Serous papillary adenocarcinoma	3	Ia	T1aN0M0	Malignant
OV20812	I5	F	51	Serous papillary adenocarcinoma	3	Ib	T1bN0M0	Malignant
OV20812	I6	F	35	Serous papillary adenocarcinoma	3	Ib	T1bN0M0	Malignant
OV20812	I7	F	50	Serous papillary adenocarcinoma	2	I	T1N0M0	Malignant
OV20812	I8	F	45	Serous papillary adenocarcinoma	3	IIb	T2bN0M0	Malignant
OV20812	I9	F	60	Serous papillary adenocarcinoma	3	IIIc	T3cN0M0	Malignant
OV20812	I10	F	72	Serous papillary adenocarcinoma	3	I	T1N0M0	Malignant
OV20812	I11	F	52	Serous papillary adenocarcinoma	3	I	T1N0M0	Malignant
OV20812	I12	F	53	Serous papillary adenocarcinoma	3	IV	T1N1M1	Malignant
OV20812	I13	F	51	Serous papillary adenocarcinoma	3	I	T1N0M0	Malignant
OV20812	I14	F	46	Serous papillary adenocarcinoma	3	IIIc	T2N1M0	Malignant
OV20812	I15	F	63	Serous papillary adenocarcinoma	3	IV	T2N1M1	Malignant
OV20812	I16	F	41	Serous papillary adenocarcinoma	3	Ic	T1cN0M0	Malignant
OV20812	J1	F	58	Serous papillary adenocarcinoma	3	I	T1N0M0	Malignant
OV20812	J2	F	40	Serous papillary adenocarcinoma	3	IIIc	T2N1M0	Malignant
OV20812	J3	F	37	Serous papillary adenocarcinoma	3	IV	T3N2M1	Malignant
OV20812	J4	F	50	Serous papillary adenocarcinoma	3	Ia	T1aN0M0	Malignant
OV20812	J5	F	49	Serous papillary adenocarcinoma	3	IIb	T2bN0M0	Malignant
OV20812	J6	F	54	Serous papillary adenocarcinoma	3	III	T3cN0M0	Malignant
OV20812	J7	F	52	Serous papillary adenocarcinoma	3	I	T1N0M0	Malignant
OV20812	J8	F	48	Serous papillary adenocarcinoma	2	IIb	T2bN0M0	Malignant
OV20812	J9	F	54	Serous papillary adenocarcinoma	2	I	T1N0M0	Malignant
OV20812	J10	F	49	Serous papillary adenocarcinoma	3	I	T1N0M0	Malignant
OV20812	J11	F	42	Serous papillary adenocarcinoma	3	IV	T3N0M1	Malignant
OV20812	J12	F	65	Mucinous papillary adenocarcinoma	3	IV	T2N0M1	Malignant
OV20812	J13	F	62	Mucinous papillary adenocarcinoma	3	IIa	T2aN0M0	Malignant
OV20812	J14	F	46	Mucinous papillary adenocarcinoma	3	I	T1N0M0	Malignant
OV20812	J15	F	37	Mucinous papillary adenocarcinoma	3	I	T1N0M0	Malignant
OV20812	J16	F	40	Mucinous papillary adenocarcinoma	1	Ia	T1aN0M0	Malignant
OV20812	K1	F	47	Serous papillary adenocarcinoma	3	Ic	T1cN0M0	Malignant
OV20812	K2	F	52	Endometrioid adenocarcinoma	1	Ia	T1aN0M0	Malignant
OV20812	K3	F	32	Endometrioid adenocarcinoma	1	Ic	T1cN0M0	Malignant
OV20812	K4	F	41	Endometrioid adenocarcinoma	-	Ic	T1cN0M0	Malignant
OV20812	K5	F	48	Endometrioid adenocarcinoma (fibrous tissue and blood vessel)	-	I	T1N0M0	Malignant
OV20812	K7	F	41	Endometrioid adenocarcinoma	2	I	T1N0M0	Malignant
OV20812	K8	F	60	Endometrioid adenocarcinoma	3	III	T3N0M0	Malignant
OV20812	K9	F	47	Endometrioid adenocarcinoma	3	I	T1N0M0	Malignant
OV20812	K10	F	63	Endometrioid adenocarcinoma	3	IIIa	T3aN0M0	Malignant
OV20812	K11	F	61	Endometrioid adenocarcinoma	3	III	T3N0M0	Malignant
OV20812	K12	F	38	Clear cell carcinoma	-	Ia	T1aN0M0	Malignant
OV20812	K13	F	61	Clear cell carcinoma with necrosis	-	Ia	T1aN0M0	Malignant
OV20812	K14	F	68	Clear cell carcinoma	-	II	T2N0M0	Malignant
OV20812	K15	F	40	Clear cell carcinoma	-	Ib	T1bN0M0	Malignant
OV20812	K16	F	42	Clear cell carcinoma	-	Ia	T1aN0M0	Malignant
OV20812	L1	F	38	Clear cell carcinoma	-	Ib	T1bN0M0	Malignant
OV20812	L2	F	18	Clear cell carcinoma (tumoral necrosis)	-	Ic	T1cN0M0	Malignant
OV20812	L3	F	47	Clear cell carcinoma	-	IIa	T2aN0M0	Malignant
OV20812	L4	F	51	Clear cell carcinoma with necrosis	-	Ib	T1bN0M0	Malignant
OV20813	A1	F	64	Serous papillary adenocarcinoma	1	I	T1N0M0	Malignant
OV20813	A2	F	39	Serous papillary adenocarcinoma (ovary tissue)	-	II	T2N0M0	Malignant
OV20813	A3	F	42	Serous papillary adenocarcinoma	1	I	T1N0M0	Malignant
OV20813	A4	F	37	Serous papillary adenocarcinoma	1	I	T1N0M0	Malignant
OV20813	A5	F	41	Serous papillary adenocarcinoma	1	I	T1N0M0	Malignant
OV20813	A6	F	38	Serous papillary adenocarcinoma	1	I	T1N0M0	Malignant
OV20813	A7	F	38	Serous papillary adenocarcinoma	1	I	T1N0M0	Malignant
OV20813	A8	F	38	Serous papillary adenocarcinoma (fibrous tissue and blood vessel)	-	Ia	T1aN0M0	Malignant
OV20813	A9	F	26	Serous papillary adenocarcinoma	1	I	T1N0M0	Malignant
OV20813	A10	F	55	Serous papillary adenocarcinoma	1	Ia	T1aN0M0	Malignant
OV20813	A11	F	25	Serous papillary adenocarcinoma	1	I	T1N0M0	Malignant
OV20813	A12	F	47	Serous papillary adenocarcinoma	1	I	T1N0M0	Malignant
OV20813	A13	F	88	Serous papillary adenocarcinoma	1	II	T2N0M0	Malignant
OV20813	A14	F	23	Serous papillary adenocarcinoma	1	I	T1N0M0	Malignant
OV20813	A15	F	44	Serous papillary adenocarcinoma	1	I	T1N0M0	Malignant
OV20813	A16	F	62	Serous papillary adenocarcinoma	1	IIb	T2bN0M0	Malignant
OV20813	B1	F	45	Serous papillary adenocarcinoma	1	IIa	T2aN0M0	Malignant
OV20813	B2	F	23	Serous papillary adenocarcinoma	1	III	T3N0M0	Malignant
OV20813	B3	F	27	Serous papillary adenocarcinoma	1	Ib	T1bN0M0	Malignant
OV20813	B4	F	74	Serous adenocarcinoma	2	Ia	T1aN0M0	Malignant
OV20813	B5	F	36	Serous papillary adenocarcinoma	1	Ia	T1aN0M0	Malignant
OV20813	B6	F	52	Serous papillary adenocarcinoma	1	I	T1N0M0	Malignant
OV20813	B7	F	45	Serous papillary adenocarcinoma	1	I	T1N0M0	Malignant
OV20813	B8	F	70	Serous papillary adenocarcinoma	1	IIb	T2bN0M0	Malignant
OV20813	B9	F	45	Serous papillary adenocarcinoma	1	IIa	T2aN0M0	Malignant
OV20813	B10	F	47	Serous papillary adenocarcinoma	1	I	T1N0M0	Malignant
OV20813	B11	F	62	Serous papillary adenocarcinoma	2	IIb	T2bN0M0	Malignant
OV20813	B12	F	21	Serous papillary adenocarcinoma	2	Ic	T1cN0M0	Malignant
OV20813	B13	F	58	Serous papillary adenocarcinoma	1	IV	T3N0M1	Malignant
OV20813	B14	F	43	Serous papillary adenocarcinoma	2	I	T1N0M0	Malignant
OV20813	B15	F	63	Serous papillary adenocarcinoma	2	Ic	T1cN0M0	Malignant
OV20813	B16	F	51	Serous papillary adenocarcinoma	2	III	T3N0M0	Malignant
OV20813	C1	F	47	Serous papillary adenocarcinoma	2	I	T1N0M0	Malignant
OV20813	C2	F	35	Serous papillary adenocarcinoma	2	I	T1N0M0	Malignant
OV20813	C3	F	40	Serous papillary adenocarcinoma	2	I	T1N0M0	Malignant
OV20813	C4	F	52	Serous papillary adenocarcinoma	2	IIIa	T3aN0M0	Malignant
OV20813	C5	F	47	Serous papillary adenocarcinoma	2	IIIc	T3cN1M0	Malignant
OV20813	C6	F	37	Serous papillary adenocarcinoma	2	IIIc	T3bN1M0	Malignant
OV20813	C7	F	50	Serous papillary adenocarcinoma	2	IIIc	T3cN0M0	Malignant
OV20813	C8	F	45	Serous papillary adenocarcinoma	2	I	T1N0M0	Malignant
OV20813	C9	F	38	Serous papillary adenocarcinoma	2	IIc	T2cN0M0	Malignant
OV20813	C10	F	49	Serous papillary adenocarcinoma	2	IIc	T2cN0M0	Malignant
OV20813	C11	F	76	Serous papillary adenocarcinoma	2	IIc	T2cN0M0	Malignant
OV20813	C12	F	35	Serous papillary adenocarcinoma (fibrous tissue)	-	Ib	T1bN0M0	Malignant
OV20813	C13	F	43	Serous papillary adenocarcinoma	2	III	T3N0M0	Malignant
OV20813	C14	F	64	Serous adenocarcinoma (sparse)	-	IIIc	T2N1M0	Malignant
OV20813	C15	F	50	Serous papillary adenocarcinoma	2	IIIa	T3aN0M0	Malignant
OV20813	C16	F	47	Serous papillary adenocarcinoma	2	I	T1N0M0	Malignant
OV20813	D1	F	59	Serous papillary adenocarcinoma	2	IIIa	T3aN0M0	Malignant
OV20813	D2	F	45	Serous papillary adenocarcinoma	2	IIIc	T3cN1M0	Malignant
OV20813	D3	F	49	Serous papillary adenocarcinoma	2	IIIc	T3aN1M0	Malignant
OV20813	D4	F	54	Serous papillary adenocarcinoma	2	IIIc	T2N1M0	Malignant
OV20813	D5	F	35	Serous papillary adenocarcinoma	2	IIIc	T3cN0M0	Malignant
OV20813	D6	F	17	Serous papillary adenocarcinoma	2	Ia	T1aN0M0	Malignant
OV20813	D7	F	59	Serous papillary adenocarcinoma	2	IIIc	T3cN0M0	Malignant
OV20813	D8	F	50	Serous papillary adenocarcinoma	2	II	T2N0M0	Malignant
OV20813	D9	F	43	Serous papillary adenocarcinoma	2	IIIc	T3N1M0	Malignant
OV20813	D10	F	56	Serous papillary adenocarcinoma	2	Ia	T1aN0M0	Malignant
OV20813	D11	F	39	Serous papillary adenocarcinoma	2	IIIc	T3cN1M0	Malignant
OV20813	D12	F	38	Serous papillary adenocarcinoma	2	I	T1N0M0	Malignant
OV20813	D13	F	57	Serous papillary adenocarcinoma	2	IIIc	T3cN1M0	Malignant
OV20813	D14	F	60	Serous papillary adenocarcinoma	2	IIb	T2bN0M0	Malignant
OV20813	D15	F	48	Serous papillary adenocarcinoma	2	IIIc	T2N1M0	Malignant
OV20813	D16	F	44	Serous papillary adenocarcinoma	2	Ia	T1aN0M0	Malignant
OV20813	E1	F	53	Serous papillary adenocarcinoma	2	III	T3N0M0	Malignant
OV20813	E2	F	41	Serous papillary adenocarcinoma	2	I	T1N0M0	Malignant
OV20813	E3	F	67	Serous papillary adenocarcinoma	2	Ia	T1aN0M0	Malignant
OV20813	E4	F	57	Serous papillary adenocarcinoma	2	IIIc	T3cN0M0	Malignant
OV20813	E5	F	53	Serous papillary adenocarcinoma	2	IIIc	T3cN0M0	Malignant
OV20813	E6	F	53	Serous adenocarcinoma	3	IIIc	T3N1M0	Malignant
OV20813	E7	F	48	Serous papillary adenocarcinoma	2	Ib	T1bN0M0	Malignant
OV20813	E8	F	47	Serous papillary adenocarcinoma	2	II	T2N0M0	Malignant
OV20813	E9	F	54	Serous adenocarcinoma	3	Ia	T1aN0M0	Malignant
OV20813	E10	F	42	Serous adenocarcinoma	3	IIb	T2bN0M0	Malignant
OV20813	E11	F	48	Serous adenocarcinoma	3	IIIa	T3aN0M0	Malignant
OV20813	E12	F	67	Serous adenocarcinoma	3	I	T1N0M0	Malignant
OV20813	E13	F	51	Serous adenocarcinoma	3	Ia	T1aN0M0	Malignant
OV20813	E14	F	49	Serous adenocarcinoma	3	IIIc	T3cN1M0	Malignant
OV20813	E15	F	41	Serous adenocarcinoma	3	I	T1N0M0	Malignant
OV20813	E16	F	66	Serous adenocarcinoma	3	IIIc	T2N1M0	Malignant
OV20813	F1	F	60	Serous adenocarcinoma	-	I	T1N0M0	Malignant
OV20813	F2	F	60	Serous adenocarcinoma	-	I	T1N0M0	Malignant
OV20813	F3	F	54	Serous adenocarcinoma	3	IV	T3cN1M1	Malignant
OV20813	F4	F	54	Serous adenocarcinoma	3	IIc	T2cN0M0	Malignant
OV20813	F5	F	59	Serous adenocarcinoma	3	I	T1N0M0	Malignant
OV20813	F6	F	51	Serous adenocarcinoma	3	IIb	T2bN0M0	Malignant
OV20813	F7	F	47	Serous adenocarcinoma	3	I	T1N0M0	Malignant
OV20813	F8	F	33	Serous adenocarcinoma	3	I	T1N0M0	Malignant
OV20813	F9	F	51	Serous adenocarcinoma	3	Ia	T1aN0M0	Malignant
OV20813	F10	F	51	Serous adenocarcinoma	3	Ia	T1aN0M0	Malignant
OV20813	F11	F	43	Serous adenocarcinoma (sparse)	-	IIIc	T3cN1M0	Malignant
OV20813	F12	F	53	Serous adenocarcinoma	3	I	T1N0M0	Malignant
OV20813	F13	F	60	Serous adenocarcinoma (sparse)	-	IIb	T2bN0M0	Malignant
OV20813	F14	F	63	Serous adenocarcinoma	3	IIIc	T3cN1M0	Malignant
OV20813	F15	F	43	Serous papillary adenocarcinoma	2	I	T1N0M0	Malignant
OV20813	F16	F	59	Serous papillary adenocarcinoma	2	II	T2N0M0	Malignant
OV20813	G1	F	54	Serous adenocarcinoma	3	Ic	T1cN0M0	Malignant
OV20813	G2	F	54	Serous adenocarcinoma	3	I	T1N0M0	Malignant
OV20813	G8	F	48	Mucinous papillary adenocarcinoma	1	I	T1N0M0	Malignant
OV20813	G9	F	37	Mucinous papillary adenocarcinoma	1	Ia	T1aN0M0	Malignant
OV20813	G10	F	48	Mucinous adenocarcinoma	2	IIIc	T3cN0M0	Malignant
OV20813	G11	F	50	Mucinous adenocarcinoma	2	IIIc	T3cN1M0	Malignant
OV20813	G12	F	27	Mucinous papillary adenocarcinoma	1	Ic	T1cN0M0	Malignant
OV20813	G13	F	50	Mucinous papillary adenocarcinoma	1	Ia	T1aN0M0	Malignant
OV20813	G14	F	35	Mucinous papillary adenocarcinoma	1	I	T1N0M0	Malignant
OV20813	G15	F	70	Mucinous papillary adenocarcinoma	1	Ia	T1aN0M0	Malignant
OV20813	G16	F	59	Mucinous papillary adenocarcinoma	1	I	T1N0M0	Malignant
OV20813	H1	F	33	Mucinous papillary adenocarcinoma	1	I	T1N0M0	Malignant
OV20813	H2	F	34	Mucinous papillary adenocarcinoma	1	I	T1N0M0	Malignant
OV20813	H3	F	34	Mucinous papillary adenocarcinoma	1	Ia	T1aN0M0	Malignant
OV20813	H4	F	38	Mucinous papillary adenocarcinoma	1	I	T1N0M0	Malignant
OV20813	H5	F	37	Mucinous adenocarcinoma	2	I	T1N0M0	Malignant
OV20813	H6	F	40	Mucinous adenocarcinoma	2	Ia	T1aN0M0	Malignant
OV20813	H7	F	50	Mucinous adenocarcinoma	3	I	T1N0M0	Malignant
OV20813	H8	F	54	Mucinous adenocarcinoma	3	I	T1N0M0	Malignant
OV20813	H9	F	38	Mucinous adenocarcinoma	3	I	T1N0M0	Malignant
OV20813	H10	F	51	Mucinous adenocarcinoma	3	Ia	T1aN0M0	Malignant
OV20813	H11	F	50	Mucinous adenocarcinoma	2	II	T2N0M0	Malignant
OV20813	H12	F	43	Mucinous adenocarcinoma	-	IIIc	T3cN1M0	Malignant
OV20813	H13	F	36	Mucinous papillary adenocarcinoma	1	Ic	T1cN0M0	Malignant
OV20813	H14	F	34	Mucinous papillary adenocarcinoma (fibrous tissue)	-	IIIc	T2cN1M0	Malignant
OV20813	H15	F	43	Mucinous papillary adenocarcinoma (mucous tissue)	-	I	T1N0M0	Malignant
OV20813	H16	F	41	Mucinous papillary adenocarcinoma	1	I	T1N0M0	Malignant
OV20813	I1	F	38	Mucinous papillary adenocarcinoma	1	IIb	T2bN0M0	Malignant
OV20813	I2	F	37	Mucinous papillary adenocarcinoma	1	I	T1N0M0	Malignant
OV20813	I3	F	35	Mucinous papillary adenocarcinoma	1	IIIc	T3aN1M0	Malignant
OV20813	I4	F	64	Mucinous papillary adenocarcinoma	1	Ia	T1aN0M0	Malignant
OV20813	I5	F	52	Mucinous papillary adenocarcinoma	1	I	T1N0M0	Malignant
OV20813	I6	F	43	Mucinous papillary adenocarcinoma	1	IIIc	T3cN1M0	Malignant
OV20813	I7	F	47	Mucinous papillary adenocarcinoma	1	I	T1N0M0	Malignant
OV20813	I8	F	43	Mucinous papillary adenocarcinoma	1	Ia	T1aN0M0	Malignant
OV20813	I9	F	54	Endometrioid adenocarcinoma	1	Ib	T1bN0M0	Malignant
OV20813	I10	F	44	Endometrioid adenocarcinoma	1	Ia	T1aN0M0	Malignant
OV20813	I11	F	44	Endometrioid adenocarcinoma	1	Ia	T1aN0M0	Malignant
OV20813	I12	F	46	Endometrioid adenocarcinoma	1	Ib	T1bN0M0	Malignant
OV20813	I13	F	57	Endometrioid adenocarcinoma	1	I	T1N0M0	Malignant
OV20813	I14	F	49	Endometrioid adenocarcinoma	1	Ia	T1aN0M0	Malignant
OV20813	I15	F	55	Endometrioid adenocarcinoma	1	I	T1N0M0	Malignant
OV20813	I16	F	33	Endometrioid adenocarcinoma	1	I	T1N0M0	Malignant
OV20813	J1	F	53	Endometrioid adenocarcinoma with phosphorization	2	I	T1N0M0	Malignant
OV20813	J2	F	55	Endometrioid adenocarcinoma	2	Ic	T1cN0M0	Malignant
OV20813	J3	F	33	Endometrioid adenocarcinoma	3	Ic	T1cN0M0	Malignant
OV20813	J4	F	51	Endometrioid adenocarcinoma	3	I	T1N0M0	Malignant
OV20813	J5	F	75	Endometrioid adenocarcinoma (necrosis)	-	I	T1N0M0	Malignant
OV20813	J6	F	45	Endometrioid adenocarcinoma	2	IIa	T2aN0M0	Malignant
OV20813	J7	F	32	Endometrioid adenocarcinoma	-	IV	T3N1M1	Malignant
OV20813	J8	F	47	Endometrioid adenocarcinoma	2	II	T2N0M0	Malignant
OV20813	J9	F	54	Endometrioid adenocarcinoma	2	Ic	T1cN0M0	Malignant
OV20813	J10	F	50	Endometrioid adenocarcinoma	2	I	T1N0M0	Malignant
OV20813	J11	F	47	Endometrioid adenocarcinoma	3	IIa	T2aN0M0	Malignant
OV20813	J12	F	41	Clear cell carcinoma	-	Ia	T1aN0M0	Malignant
OV20813	J13	F	53	Clear cell carcinoma	-	Ib	T1bN0M0	Malignant
OV20813	J14	F	44	Clear cell carcinoma	-	Ic	T1cN0M0	Malignant
OV20813	J15	F	48	Clear cell carcinoma	-	I	T1N0M0	Malignant
OV20813	J16	F	43	Clear cell carcinoma	-	Ia	T1aN0M0	Malignant
OV20813	K1	F	38	Clear cell carcinoma	-	Ia	T1aN0M0	Malignant
OV20813	K2	F	58	Clear cell carcinoma	-	I	T1N0M0	Malignant
OV20813	K3	F	50	Clear cell carcinoma	-	I	T1N0M0	Malignant
OV20813	K4	F	53	Clear cell carcinoma	-	I	T1N0M0	Malignant
OV20813	K5	F	55	Clear cell carcinoma	-	Ia	T1aN0M0	Malignant
OV20813	K6	F	51	Clear cell carcinoma	-	Ia	T1aN0M0	Malignant
