# Supplementary material for: PAX8 regulon in human ovarian cancer links lineage dependency with epigenetic vulnerability to HDAC inhibitors
Source: eLife journal article supplement (doi:10.7554/elife.44306), 2019-05-03
Supplement: supp [file elife-44306-supp-v1.zip › elife_poa_e44306_Supplementary_File_3.xlsx]

## Sheet: Table S3
Supplementary File 3. Screening of 180 inhibitors in KURAMOCHI cells
Inhibitor Name	Catalog Number	Target	PAX8/DAPI ratio
(+)-JQ1	S7110	BRD	204.73
17-AAG (Tanespimycin)	S1141	HSP (e.g. HSP90)	138.52
A-769662	S2697	AMPK	235.95
Abiraterone (CB-7598)	S1123	Androgen Receptor	236.93
Abitrexate (Methotrexate)	S1210	DHFR	254.89
ABT-199 (GDC-0199)	S8048	Bcl-2	328.16
ABT-263 (Navitoclax)	S1001	Bcl-2	345.03
ABT-751	S1165	Microtubule Associated	358.49
ABT-888 (Veliparib)	S1004	PARP	234.81
Adrucil (Fluorouracil)	S1209	DNA/RNA Synthesis	266.08
Afatinib (BIBW2992)	S1011	EGFR	304.1
Alectinib (CH5424802)	S2762	ALK	206.56
Altretamine (Hexalen)	S1278	NA	239.04
Anastrozole	S1188	Aromatase	302.85
Apitolisib (GDC-0980, RG7422)	S2696	PI3K/mTOR	291.39
AT13387	S1163	HSP (e.g. HSP90)	140.16
AT7519	S1524	CDK	150.42
Axitinib	S1005	VEGFR	239.49
AZD1080	S7145	GSK-3	366.24
AZD1208	S7104	Pim	301.98
AZD4547	S2801	FGFR	318.82
AZD5363	S8019	Akt	248.48
AZD6244 (Selumetinib)	S1008	MEK	367.46
AZD7762	S1532	Chk	97.13
AZD8055	S1555	mTOR	295.14
AZD9291	S7297	EGFR	338.11
Barasertib (AZD1152-HQPA)	S1147	Aurora Kinase	357.67
Bardoxolone Methyl	S8078	IKK	70.98
Baricitinib (LY3009104, INCB028050)	S2851	JAK	262.24
BAY 11-7082 (BAY 11-7821)	S2913	IKK	247.38
BAY 87-2243	S7309	HIF	252.92
BEZ235 (NVP-BEZ235)	S1009	PI3K/mTOR	278
BGJ398 (NVP-BGJ398)	S2183	FGFR	332.64
BI 2536	S1109	PLK	167.48
BI6727 (Volasertib)	S2235	PLK	174.03
BIBF1120 (Vargatef)	S1010	FGFR	338.81
BIBR 1532	S1186	Telomerase	249.4
Bicalutamide (Casodex)	S1190	Androgen Receptor	241.22
Binimetinib (MEK162, ARRY-162, ARRY-438162)	S7007	MEK	294.4
BIRB 796 (Doramapimod)	S1574	p38 MAPK	262.54
Birinapant	S7015	IAP	319.99
BKM120 (NVP-BKM120)	S2247	PI3K	295.47
BMS 777607	S1561	Axl	234.1
BMS 794833	S2201	c-Met	290.39
BMS-345541	S8044	IKK	233.13
Bortezomib (Velcade)	S1013	Proteasome	216.84
Bosutinib (SKI-606)	S1014	Bcr-Abl	261.25
BX-795	S1274	PDK1	346.57
Cabozantinib (XL184, BMS-907351)	S1119	Axl	272.89
CAL-101 (Idelalisib, GS-1101)	S2226	p110δ	235.02
Capecitabine (Xeloda)	S1156	DNA/RNA Synthesis	266.37
Carboplatin	S1215	DNA/RNA Synthesis	298.79
Celecoxib	S1261	COX	241.09
Ceritinib (LDK378)	S7083	ALK	250.94
CHIR-99021 (CT99021) HCl	S2924	GSK-3	263.42
Cisplatin	S1166	DNA/RNA Synthesis	212.96
Crenolanib (CP-868596)	S2730	PDGFR	300.04
Crizotinib (PF-02341066)	S1068	ALK	166.66
CX-4945 (Silmitasertib)	S2248	PKC	217.58
Dabrafenib (GSK2118436)	S2807	Raf	211.58
DAPT (GSI-IX)	S2215	γ-secretase	215.03
Dasatinib (BMS-354825)	S1021	Bcr-Abl	490.18
Deforolimus (Ridaforolimus)	S1022	mTOR	281.64
Dinaciclib (SCH727965)	S2768	CDK	204.47
Docetaxel (Taxotere)	S1148	Microtubule Associated	191.63
Dovitinib (TKI-258)	S1018	c-Kit	329.92
Doxorubicin (Adriamycin)	S1208	Topoisomerase	98.2
Entinostat (MS-275, SNDX-275)	S1053	HDAC	214.02
Enzastaurin (LY317615)	S1055	PKC	302.55
Epirubicin HCl	S1223	Topoisomerase	54.64
EPZ-6438	S7128	EZH2	215.03
Everolimus (RAD001)	S1120	mTOR	139.46
EX 527	S1541	Sirtuin	280.22
Exemestane	S1196	Aromatase	227.98
Flavopiridol (Alvocidib) HCl	S2679	CDK	196.04
Flutamide (Eulexin)	S1908	Androgen Receptor	229.39
Fulvestrant (Faslodex)	S1191	Estrogen/progestogen Receptor	225.72
Ganetespib (STA-9090)	S1159	HSP (e.g. HSP90)	193.68
GDC-0879	S1104	Raf	174.82
GDC-0941	S1065	PI3K	267.22
GDC-0994	S7554	ERK	302.01
Gefitinib (Iressa)	S1025	EGFR	280.91
Gemcitabine (Gemzar)	S1714	DNA/RNA Synthesis	467.31
GS-9973	S7523	Syk	231.46
GSK1120212 (Trametinib)	S2673	MEK	159.68
GSK1904529A	S1093	IGF-1R	202.54
GSK2334470	S7087	PDK1	318.33
GSK2656157	S7033	PERK	241.99
GSK429286A	S1474	ROCK	203.64
I-BET-762	S7189	BRD	232.03
Ifosfamide	S1302	DNA/RNA Synthesis	301.14
Imatinib (Gleevec)	S2475	Bcr-Abl	258.74
Iniparib (BSI-201)	S1087	PARP	224.49
INK 128 (MLN0128)	S2811	mTOR	320.24
Ipatasertib (GDC-0068)	S2808	Akt	255.7
Irinotecan	S1198	Topoisomerase	254.78
JNJ 26854165 (Serdemetan)	S1172	E3 Ligase	265.66
JNK-IN-8	S4901	JNK	192.03
K02288	S7359	TGF-beta/Smad	276.62
KU-60019	S1570	ATM	304.12
Lapatinib	S2111	EGFR	351.11
LDE225 (NVP-LDE225, Erismodegib)	S2151	Smoothened	301.46
LDN193189	S2618	TGF-beta/Smad	359.06
Letrozole	S1235	Aromatase	284.91
Leucovorin Calcium	S1236	NA	226.67
Linsitinib (OSI-906)	S1091	IGF-1R	212.68
Losmapimod	S7215	p38 MAPK	285.45
LY2109761	S2704	TGF-beta/Smad	303.8
LY2157299	S2230	TGF-beta/Smad	119.39
LY2603618	S2626	Chk	112.89
LY2835219	S7158	CDK	481.56
Masitinib (AB1010)	S1064	c-Kit	259.46
MDV3100 (Enzalutamide)	S1250	Androgen Receptor	238.05
Metformin HCl	S1950	Autophagy	278.25
Mifepristone (Mifeprex)	S2606	Estrogen/progestogen Receptor	208.53
MK-0752	S2660	γ-secretase	193.52
MK-1775	S1525	Wee1	288.98
MK-2206 2HCl	S1078	Akt	268.92
MLN2238	S2180	Proteasome	217.96
MLN8237 (Alisertib)	S1133	Aurora Kinase	337.4
Neratinib (HKI-272)	S2150	EGFR	269.68
Nilotinib (AMN-107)	S1033	Bcr-Abl	320.67
NU7441 (KU-57788)	S2638	DNA-PK	300.31
Nutlin-3	S1061	E3 Ligase	212.67
NVP-AEW541	S1034	IGF-1R	273.72
Obatoclax mesylate (GX15-070)	S1057	Bcl-2	339.86
Olaparib (AZD2281)	S1060	PARP	238.63
Oxaliplatin (Eloxatin)	S1224	DNA/RNA Synthesis	246.11
PAC-1	S2738	Caspase	319.1
Paclitaxel (Taxol)	S1150	Microtubule Associated	159.29
Panobinostat (LBH589)	S1030	HDAC	69.5
Pazopanib	S3012	c-Kit	345.43
PCI-32765 (Ibrutinib)	S2680	BTK	253.88
PD 0332991 (Palbociclib) HCl	S1116	CDK	329.46
PD0325901	S1036	MEK	257.37
Pemetrexed (Alimta)	S1135	DHFR	211.34
PF-04929113 (SNX-5422)	S2656	HSP (e.g. HSP90)	157.29
PF-562271	S2890	FAK	384.37
PHA-665752	S1070	c-Met	279.13
Phenformin HCl	S2542	AMPK	227.1
R428 (BGB324)	S2841	Axl	177.95
R935788 (Fostamatinib disodium, R788 disodium)	S2206	Syk	242.75
Raltitrexed (Tomudex)	S1192	DNA/RNA Synthesis	203.18
Regorafenib (BAY 73-4506)	S1178	c-Kit	204.08
Rigosertib (ON-01910)	S1362	PLK	173.58
RKI-1447	S7195	ROCK	269.6
Romidepsin (FK228, Depsipeptide)	S3020	HDAC	59.25
Roscovitine (Seliciclib, CYC202)	S1153	CDK	372.17
Rucaparib (AG-014699 , PF-01367338)	S1098	PARP	236.02
Ruxolitinib (INCB018424)	S1378	JAK	235.62
SB 203580	S1076	p38 MAPK	301.35
SCH772984	S7101	ERK	323.49
SGI-1776 free base	S2198	Pim	281.5
Sorafenib (Nexavar)	S1040	VEGFR	246.03
Sotrastaurin (AEB071)	S2791	PKC	255.76
SP600125	S1460	JNK	282.94
Sunitinib Malate (Sutent)	S1042	VEGFR	227.04
TAE226 (NVP-TAE226)	S2820	FAK	357.92
Tamoxifen Citrate (Nolvadex)	S1972	Estrogen/progestogen Receptor	313.47
Tandutinib (MLN518)	S1043	FLT3	277.04
Temozolomide	S1237	Autophagy	263.21
Temsirolimus (Torisel)	S1044	mTOR	277.04
Tipifarnib (Zarnestra)	S1453	Transferase	226.34
Tofacitinib (CP-690550) Citrate	S5001	JAK	248.98
Topotecan HCl	S1231	Topoisomerase	88.56
Toremifene Citrate (Fareston, Acapodene)	S1776	Estrogen/progestogen Receptor	331.39
Torin 2	S2817	ATM/ATR	148.79
Trichostatin A (TSA)	S1045	HDAC	101.37
TW-37	S1121	Bcl-2	278.17
Valproic acid sodium salt (Sodium valproate)	S1168	HDAC	204.64
Vandetanib (Zactima)	S1046	VEGFR	252.34
VE-822	S7102	ATR	207.58
Vemurafenib (PLX4032)	S1267	Raf	261.7
Vismodegib (GDC-0449)	S1082	Hedgehog	341.84
Vorinostat (SAHA)	S1047	HDAC	297.75
VX-680 (MK-0457, Tozasertib)	S1048	Aurora Kinase	346.3
WP1130	S2243	DUB	234.95
XAV-939	S1180	Wnt/beta-catenin	210.32
YM155	S1130	IAP	78.09
Z-VAD-FMK	S7023	Caspase	265.63
