# Supplementary material for: PAX8 regulon in human ovarian cancer links lineage dependency with epigenetic vulnerability to HDAC inhibitors
Source: eLife journal article supplement (doi:10.7554/elife.44306), 2019-05-03
Supplement: supp [file elife-44306-supp-v1.zip › elife_poa_e44306_Supplementary_File_4.xlsx]

## Sheet: Table S4
Supplementary File 4. PAX8 gene signature expression
ID	Gene symbol	control-1	control-2	control-3	panobinostat-1	panobinostat-2	panobinostat-3	romidepsin-1	romidepsin-2	romidepsin-3	sgPAX8-1-1	sgPAX8-1-2	sgPAX8-1-3	sgPAX8-2-1	sgPAX8-2-2	sgPAX8-2-3
ENSG00000262655	SPON1	13850.1	13369.2	13309.4	921.743	924.774	1015.45	816.883	998.716	924.487	2327.37	2390.03	2363.83	3812.69	3835.93	3899.51
ENSG00000143631	FLG	2523.4	3016.75	2789.41	70.5158	100.235	83.1662	96.4585	95.2722	100.09	389.319	351.136	434.386	600.583	605.465	581.778
ENSG00000188488	SERPINA5	1802.43	1867.73	1851.99	320.679	319.008	380.922	293.395	351.522	322.871	445.343	423.666	449.214	491.489	520.66	467.558
ENSG00000108018	SORCS1	1303.48	1413.93	1374.24	110.811	112.437	131.423	108.516	124.839	121.615	267.775	272.85	299.185	430.755	356.968	372.552
ENSG00000198691	ABCA4	879.729	1003.72	962.162	25.1842	29.6346	19.5081	15.0716	22.9967	27.9821	130.09	155.421	143.923	212.566	196.234	162.257
ENSG00000113946	CLDN16	2287.06	1890.08	1870.08	26.0237	19.1753	28.7488	17.0812	26.282	22.601	373.176	413.305	371.583	749.042	708.019	684.257
ENSG00000156427	FGF18	827.208	785.763	902.205	363.492	334.697	305.969	395.882	353.164	399.284	128.19	138.152	153.518	211.441	311.607	243.386
ENSG00000188883	KLRG2	2606.96	2158.33	2588.61	563.287	510.761	513.372	572.722	509.214	591.93	572.584	451.296	461.426	603.957	845.087	772.858
ENSG00000157064	NMNAT2	5344.03	6120.68	6019.46	618.693	672.88	606.805	625.975	574.097	559.643	1892.47	1913.4	1864.89	2175.15	2058.97	2116.82
ENSG00000150551	LYPD1	944.187	822.648	935.514	117.526	122.025	118.075	121.578	94.4509	111.929	199.407	168.085	178.813	263.177	301.746	255.128
ENSG00000135205	CCDC146	2221.41	2093.51	2021.4	46.1711	54.9112	55.4441	58.277	67.3476	57.0405	564.038	535.339	653.323	872.758	701.116	784.6
ENSG00000082684	SEMA5B	1958.8	2215.34	2207.93	40.2948	47.0667	50.3104	52.2484	41.0656	38.7445	645.7	577.936	669.896	558.97	700.13	686.391
ENSG00000140511	HAPLN3	626.673	546.569	628.117	188.042	206.571	206.375	193.922	195.472	192.646	119.644	116.278	121.244	150.708	216.942	199.619
ENSG00000125872	LRRN4	270.961	283.903	294.073	12.5921	13.9457	9.24069	17.0812	5.74919	11.8386	21.8398	17.269	18.3175	33.7406	45.3606	30.957
ENSG00000139292	LGR5	1882.41	1668.77	1496.06	123.403	141.2	138.61	142.678	156.049	136.682	491.871	467.414	449.214	529.728	476.286	538.011
ENSG00000101144	BMP7	8860.56	9501.81	10811.2	1656.28	1663.03	1794.75	1672.95	1520.25	1639.11	3564.64	3411.2	3280.57	3466.29	4727.36	4607.26
ENSG00000136842	TMOD1	1008.65	910.949	953.597	109.971	103.721	98.5673	79.3773	82.9526	104.395	231.692	233.707	278.251	343.03	274.136	324.515
ENSG00000235750	KIAA0040	1452.69	1654.24	1640.72	376.084	393.966	402.483	407.939	422.155	410.046	488.073	529.582	489.338	635.449	551.229	614.87
ENSG00000197705	KLHL14	753.201	732.112	676.654	20.1474	10.4593	16.4279	29.1385	11.4984	20.4485	166.173	173.841	186.664	226.062	203.136	244.454
ENSG00000155850	SLC26A2	2217.83	1692.24	1679.74	720.269	682.468	675.597	599.851	689.902	718.926	481.426	506.557	497.188	647.82	532.493	516.662
ENSG00000147606	SLC26A7	422.557	349.849	308.349	19.3079	22.6618	18.4814	14.0669	9.85575	17.2198	44.6292	33.3867	27.9123	44.9875	41.4162	50.1717
ENSG00000163347	CLDN1	909.571	822.648	841.297	267.792	304.191	317.264	267.27	266.105	280.898	252.583	265.942	261.678	399.264	375.704	351.202
ENSG00000135069	PSAT1	3943.86	3672.86	3585.98	972.111	920.416	1023.66	942.48	977.362	986.909	1602.85	1551.91	1627.64	1799.5	1629.04	1611.9
ENSG00000109255	NMU	263.799	288.374	289.315	161.179	179.551	157.092	171.817	149.479	171.122	36.0832	37.9918	34.8904	57.3591	56.2076	71.5214
ENSG00000178445	GLDC	537.148	564.453	567.209	828.561	816.695	824.475	810.854	823.776	842.693	145.282	150.816	135.2	116.968	118.332	144.11
ENSG00000153132	CLGN	506.113	552.158	517.721	533.906	597.922	571.896	510.426	548.637	556.414	138.636	130.093	118.627	191.197	147.915	175.067
ENSG00000095587	TLL2	704.261	718.7	697.591	438.206	427.087	396.323	418.992	449.258	454.172	227.894	204.925	211.087	305.915	296.816	338.392
ENSG00000146038	DCDC2	3189.47	2827.85	2673.31	202.313	192.625	187.894	177.845	174.118	170.045	1187.9	1104.06	1167.08	1401.36	1158.67	1287.38
ENSG00000077063	CTTNBP2	380.778	320.788	327.382	67.1579	87.1606	55.4441	65.3104	66.5263	64.5742	61.7213	71.3785	60.186	74.2294	56.2076	77.9263
ENSG00000197635	DPP4	2086.52	2415.41	2105.15	332.432	279.786	324.451	290.38	283.353	309.956	913.475	895.685	842.604	1103.32	911.156	887.078
ENSG00000165072	MAMDC2	1205.6	1103.2	1113.48	142.711	146.43	199.188	136.65	151.121	134.53	466.233	423.666	423.919	500.486	498.966	491.042
ENSG00000197943	PLCG2	514.469	513.038	589.098	646.395	692.927	659.169	654.109	686.617	654.352	152.879	161.177	150.029	223.813	208.067	206.024
ENSG00000076864	RAP1GAP	1161.43	1563.7	1649.28	1056.9	1099.97	1109.91	1147.45	1088.24	1099.91	459.586	406.397	446.597	442.002	572.924	571.103
ENSG00000153822	KCNJ16	392.715	456.033	422.552	20.9869	25.2766	23.6151	19.0907	24.6394	26.9059	121.543	99.0089	103.799	131.588	128.193	129.165
ENSG00000115457	IGFBP2	33581.3	27158.6	31401.1	16129.7	16335.6	18003.9	16846.1	16210.2	17706.2	13801.8	14070.8	13686.6	13193.7	16239.1	15583.1
ENSG00000101680	LAMA1	275.736	277.197	250.295	531.387	489.843	550.334	546.598	536.317	552.109	56.0239	42.5969	46.2298	57.3591	70.013	76.8588
ENSG00000120278	PLEKHG1	946.575	941.128	980.244	115.847	116.795	133.477	107.511	110.056	113.005	348.488	379.918	396.879	477.992	464.453	439.803
ENSG00000070882	OSBPL3	444.043	415.795	375.919	343.345	333.825	313.157	316.504	337.559	325.023	108.25	115.127	94.2041	128.214	128.193	119.558
ENSG00000048540	LMO3	372.423	348.731	317.866	14.2711	14.8173	10.2674	10.0478	16.4262	18.296	86.4098	80.5886	86.3538	60.7331	91.7072	93.9385
ENSG00000117472	TSPAN1	540.729	558.864	548.175	67.9974	59.2692	86.2464	59.2818	82.1312	86.0989	173.769	176.144	198.003	226.062	264.275	227.374
ENSG00000049283	EPN3	586.088	722.053	904.109	11.7526	10.4593	18.4814	26.1242	19.7115	21.5247	176.618	212.984	192.77	211.441	303.719	265.803
ENSG00000147394	ZNF185	978.803	1092.02	1048.77	472.624	468.924	484.623	433.058	484.574	476.773	416.856	417.91	449.214	451	531.507	535.876
ENSG00000165023	DIRAS2	306.771	295.08	285.508	85.6264	109.822	87.2732	59.2818	81.3099	66.7266	72.1664	73.681	75.0144	107.97	114.387	115.288
ENSG00000106070	GRB10	1132.79	1118.85	1204.84	338.308	372.176	333.692	383.824	365.484	379.911	505.165	531.885	468.404	465.621	492.063	469.692
ENSG00000263961	C1orf186	561.021	595.75	566.257	9.23422	14.8173	9.24069	14.0669	11.4984	17.2198	199.407	226.799	222.426	249.681	239.622	277.546
ENSG00000131037	EPS8L1	609.962	604.691	715.673	128.44	128.998	121.156	151.721	144.551	146.368	237.39	217.589	250.339	217.065	323.44	282.883
ENSG00000074410	CA12	429.719	483.977	509.156	88.9843	94.1335	87.2732	98.468	87.0591	101.166	164.274	170.387	131.711	195.696	165.665	167.595
ENSG00000113924	HGD	139.659	177.719	153.223	6.71579	1.74321	2.05349	3.01433	2.46394	6.45742	19.9407	26.4791	21.8065	41.6135	34.5135	53.3741
ENSG00000146904	EPHA1	183.824	192.249	171.305	139.353	136.842	163.252	163.778	177.403	188.341	27.5372	26.4791	40.9962	46.1122	40.4301	52.3067
ENSG00000186007	LEMD1	645.772	770.115	886.026	13.4316	13.0741	12.3209	6.02866	9.85575	7.53365	289.615	280.909	297.441	302.541	283.01	273.276
ENSG00000182132	KCNIP1	454.786	385.616	450.151	17.629	25.2766	30.8023	13.0621	18.8902	22.601	164.274	153.118	140.434	182.199	221.872	195.349
ENSG00000156510	HKDC1	251.863	231.37	248.392	20.1474	17.4321	16.4279	14.0669	20.5328	18.296	73.116	67.9247	60.186	83.2269	93.6794	83.2637
ENSG00000151693	ASAP2	465.528	418.031	413.035	196.437	162.99	155.038	208.993	177.403	162.512	176.618	140.454	143.923	194.571	215.956	199.619
ENSG00000196353	CPNE4	233.958	235.841	238.875	135.155	162.119	160.172	144.688	110.056	133.453	56.9735	70.2272	68.0363	56.2344	58.1798	65.1165
ENSG00000168505	GBX2	115.785	162.071	135.14	216.584	240.563	272.087	246.17	266.927	257.22	11.3947	23.0253	21.8065	38.2394	50.2911	51.2392
ENSG00000165025	SYK	103.849	140.834	119.913	15.1105	17.4321	18.4814	11.0525	18.8902	15.0673	18.0416	16.1177	13.0839	38.2394	36.4857	33.092
ENSG00000151692	RNF144A	261.412	225.781	245.537	122.563	108.079	108.835	104.497	86.2378	113.005	73.116	75.9836	59.3137	86.601	83.8184	82.1962
ENSG00000135373	EHF	212.472	243.665	203.662	6.71579	7.84446	2.05349	6.02866	10.6771	7.53365	56.0239	63.3196	59.3137	56.2344	63.1103	86.4661
ENSG00000198771	RCSD1	96.6867	76.0056	71.377	8.39474	5.22964	8.21395	5.02388	9.85575	8.60989	2.84868	2.30253	7.85034	8.9975	14.7915	7.47238
ENSG00000149294	NCAM1	439.268	520.862	544.368	2916.33	2918.14	2863.59	2796.29	2829.42	2721.8	202.256	206.077	198.003	178.825	167.637	180.405
ENSG00000101938	CHRDL1	520.437	568.924	490.122	251.842	254.509	235.124	208.993	232.431	243.229	237.39	217.589	195.386	217.065	233.705	199.619
ENSG00000073849	ST6GAL1	383.166	387.852	361.643	103.255	105.464	88.2999	109.521	98.5575	109.776	138.636	131.244	158.751	138.337	128.193	123.828
ENSG00000023171	GRAMD1B	458.366	546.569	542.465	67.9974	64.4989	79.0592	68.3248	80.4886	52.7356	200.357	180.749	230.277	206.943	193.275	222.036
ENSG00000167600	CYP2S1	292.447	391.205	407.325	233.374	273.684	291.595	266.266	298.958	283.05	119.644	120.883	123.861	101.222	165.665	145.178
ENSG00000114638	UPK1B	239.926	222.428	215.083	294.655	255.381	270.033	215.022	270.212	309.956	75.0151	64.4709	55.8247	66.3566	81.8462	86.4661
ENSG00000151320	AKAP6	381.972	270.49	284.556	167.895	169.092	149.905	177.845	176.582	162.512	94.9558	108.219	91.5873	100.097	97.6238	113.153
ENSG00000172379	ARNT2	213.666	226.899	202.711	107.453	94.1335	104.728	107.511	98.5575	110.852	63.6204	64.4709	70.6531	62.9825	80.8601	66.1839
ENSG00000162551	ALPL	772.3	1100.96	1297.16	2292.6	2159.84	2318.39	2714.9	2356.35	2303.15	435.847	360.346	386.411	412.76	508.827	552.956
ENSG00000015133	CCDC88C	366.454	380.028	392.098	176.29	203.956	181.734	160.764	186.438	195.875	165.223	164.631	150.901	149.583	196.234	186.81
ENSG00000121966	CXCR4	148.014	119.597	135.14	190.561	183.037	197.135	185.884	185.617	192.646	29.4363	27.6304	29.6569	34.8653	29.583	33.092
ENSG00000157514	TSC22D3	285.285	276.079	269.329	72.1948	80.1878	73.9255	82.3916	71.4542	92.5563	107.3	86.345	105.544	106.845	100.582	114.221
ENSG00000272636	DOC2B	318.708	375.557	405.421	87.3053	86.289	89.3267	109.521	70.6329	90.4038	114.897	134.698	157.879	84.3516	76.9157	71.5214
ENSG00000072571	HMMR	1091.01	822.648	832.732	212.387	240.563	224.857	211.003	246.394	232.467	425.402	414.456	440.492	451	377.676	380.024
ENSG00000198121	LPAR1	232.764	226.899	221.745	19.3079	24.405	9.24069	18.086	23.8181	16.1435	73.116	84.0424	79.3757	111.344	93.6794	108.883
ENSG00000256234	RP11-283G6.4	112.204	78.241	87.5558	3.3579	6.10124	6.16046	1.00478	4.92787	8.60989	13.2938	14.9665	10.4671	16.8703	17.7498	19.2147
ENSG00000165409	TSHR	186.211	238.076	223.648	4.19737	6.97285	3.08023	8.03821	5.74919	3.22871	56.0239	66.7734	77.6312	59.6085	80.8601	68.3189
ENSG00000162878	PKDCC	525.212	403.5	480.605	129.279	127.255	138.61	159.759	103.485	117.31	208.903	208.379	198.003	143.96	209.053	240.184
ENSG00000035499	DEPDC1B	329.451	305.14	291.218	273.669	236.205	227.937	222.056	220.112	220.628	121.543	138.152	110.777	115.843	136.082	139.84
ENSG00000174718	KIAA1551	820.046	776.822	618.601	271.15	255.381	224.857	299.423	237.359	292.736	339.942	363.8	343.671	291.294	261.316	289.288
ENSG00000140873	ADAMTS18	232.764	228.017	201.759	6.71579	6.10124	14.3744	10.0478	12.3197	6.45742	75.9647	78.2861	77.6312	112.469	98.6099	93.9385
ENSG00000155629	PIK3AP1	143.24	136.363	150.368	88.9843	94.1335	111.915	92.4394	98.5575	76.4128	32.285	43.7481	36.6349	59.6085	58.1798	49.1042
ENSG00000259439	RP11-89K21.1	319.902	298.434	247.44	5.03685	3.48643	7.1872	4.0191	8.21312	8.60989	107.3	119.732	92.4596	110.219	119.318	113.153
ENSG00000167191	GPRC5B	185.018	204.544	212.228	361.813	337.312	381.948	365.738	347.415	368.073	59.8222	74.8323	67.1641	59.6085	66.0686	95.006
ENSG00000157087	ATP2B2	163.532	169.895	189.387	41.1342	36.6075	56.4709	48.2292	50.1001	30.1346	50.3266	62.1684	47.1021	58.4838	78.8879	66.1839
ENSG00000168078	PBK	503.726	363.262	368.305	228.337	211.8	200.215	221.051	223.397	228.162	173.769	165.782	157.879	197.945	167.637	186.81
ENSG00000198729	PPP1R14C	107.43	102.831	92.3142	198.116	186.524	201.242	199.95	216.826	220.628	19.9407	24.1766	13.9562	25.8678	13.8054	18.1472
ENSG00000118407	FILIP1	361.68	318.553	371.16	55.4053	51.4248	52.3639	54.2579	51.7427	41.9732	155.728	162.329	143.923	161.955	127.207	118.491
ENSG00000215475	SIAH3	116.979	155.364	152.271	94.8606	87.1606	78.0325	113.54	101.021	78.5652	30.3859	42.5969	41.8685	46.1122	45.3606	59.779
ENSG00000147689	FAM83A	200.535	268.255	265.522	21.8263	10.4593	13.3477	12.0573	13.9623	15.0673	94.9558	86.345	93.3319	107.97	107.485	106.748
ENSG00000130224	LRCH2	349.743	267.137	285.508	162.019	149.045	173.52	167.798	164.262	164.664	115.846	118.58	133.456	159.706	141.012	122.761
ENSG00000174607	UGT8	90.7184	108.42	124.672	169.574	150.788	172.493	156.745	167.548	174.35	12.3443	26.4791	26.1678	22.4938	28.5969	27.7546
ENSG00000166803	KIAA0101	323.483	273.844	237.923	70.5158	67.9853	66.7383	80.3821	100.2	86.0989	117.745	109.37	105.544	145.085	121.29	125.963
ENSG00000174348	PODN	163.532	235.841	200.807	15.95	13.9457	13.3477	8.03821	14.7836	16.1435	71.2169	71.3785	64.5473	82.1022	103.54	95.006
ENSG00000137393	RNF144B	348.55	276.079	257.909	104.934	88.0322	96.5139	82.3916	103.485	81.794	124.392	110.522	123.861	122.591	125.235	121.693
ENSG00000168081	PNOC	188.599	372.204	339.754	98.2185	114.18	113.968	71.3391	91.1657	95.785	87.3594	110.522	81.9925	93.3491	72.9713	69.3864
ENSG00000088305	DNMT3B	170.694	240.312	210.324	382.8	405.297	368.601	434.063	398.337	393.902	71.2169	82.8912	68.0363	102.347	108.471	78.9937
ENSG00000140451	PIF1	138.465	122.95	118.01	61.2816	57.526	69.8185	74.3534	62.4197	59.193	42.7301	33.3867	26.1678	38.2394	38.4579	54.4416
ENSG00000172197	MBOAT1	157.563	136.363	150.368	26.8632	13.0741	23.6151	21.1003	14.7836	19.3723	44.6292	55.2608	43.613	52.8603	47.3328	54.4416
ENSG00000172005	MAL	174.275	159.835	187.484	26.8632	29.6346	26.6953	36.1719	40.2443	37.6683	49.377	66.7734	65.4195	41.6135	50.2911	48.0367
ENSG00000281406	BLACAT1	261.412	247.018	213.179	3.3579	4.35803	3.08023	1.00478	0	3.22871	94.9558	87.4962	108.16	109.095	113.401	100.343
ENSG00000163449	TMEM169	251.863	287.256	289.315	146.908	154.274	166.332	133.635	139.623	150.673	124.392	101.311	129.967	133.838	109.457	117.423
ENSG00000163638	ADAMTS9	293.641	311.846	281.701	20.9869	19.1753	19.5081	24.1146	19.7115	23.6772	140.535	127.791	140.434	127.09	114.387	138.773
ENSG00000116544	DLGAP3	193.373	222.428	328.334	319	313.778	363.467	340.619	299.779	334.709	64.57	96.7064	85.4815	79.8528	102.554	73.6563
ENSG00000281162	LINC01127	87.1374	91.6538	83.749	0	1.74321	2.05349	1.00478	4.10656	1.07624	22.7894	9.21013	20.062	39.3641	29.583	34.1595
ENSG00000136352	NKX2-1	108.623	126.303	135.14	15.95	27.0198	14.3744	30.1433	21.3541	17.2198	40.831	32.2355	35.7627	28.1172	36.4857	30.957
ENSG00000102221	JADE3	226.796	191.132	192.242	135.995	123.768	141.691	140.669	143.73	123.767	86.4098	82.8912	69.7808	95.5985	88.7489	91.8035
ENSG00000107742	SPOCK2	224.409	194.485	247.44	11.7526	11.3309	11.2942	16.0764	8.21312	18.296	79.7629	87.4962	102.054	87.7257	93.6794	106.748
ENSG00000164197	RNF180	119.366	111.773	101.831	22.6658	20.9186	18.4814	12.0573	20.5328	18.296	34.1841	35.6893	24.4233	43.8628	40.4301	32.0245
ENSG00000175463	TBC1D10C	81.1691	117.362	120.865	5.87632	10.4593	1.02674	11.0525	6.5705	2.15247	25.6381	29.9329	30.5291	37.1147	33.5274	41.6318
ENSG00000197587	DMBX1	120.56	127.421	138.947	232.534	241.435	269.007	257.223	240.645	283.05	50.3266	29.9329	41.8685	34.8653	46.3467	43.7668
ENSG00000183454	GRIN2A	143.24	137.481	145.609	30.2211	42.7087	46.2034	47.2245	40.2443	51.6593	40.831	57.5633	52.3356	60.7331	65.0825	41.6318
ENSG00000143536	CRNN	33.4226	90.536	72.3287	0	0	0	0	1.64262	1.07624	10.4451	4.60506	8.7226	8.9975	11.8332	8.53986
ENSG00000123360	PDE1B	60.8768	53.651	75.1838	42.8132	48.81	45.1767	49.234	51.7427	37.6683	8.54603	13.8152	11.3394	19.1197	10.8471	8.53986
ENSG00000139211	AMIGO2	183.824	133.01	173.208	56.2448	81.931	68.7918	65.3104	59.1345	52.7356	34.1841	57.5633	66.2918	61.8578	60.152	45.9018
ENSG00000181778	TMEM252	60.8768	65.946	69.4736	0.839474	0	1.02674	0	0.821312	0	9.49558	17.269	11.3394	12.3716	15.7776	17.0797
ENSG00000150625	GPM6A	105.042	124.068	105.638	52.8869	61.0124	54.4174	52.2484	50.9214	45.2019	41.7806	32.2355	26.1678	21.3691	19.722	23.4846
ENSG00000134755	DSC2	126.528	139.716	124.672	19.3079	20.9186	17.4546	13.0621	12.3197	8.60989	51.2762	43.7481	42.7408	65.2319	58.1798	48.0367
ENSG00000141738	GRB7	251.863	270.49	273.136	69.6764	64.4989	83.1662	93.4442	69.8116	60.2692	141.484	109.37	129.967	109.095	130.165	131.3
ENSG00000157470	FAM81A	85.9437	53.651	86.6041	75.5527	80.1878	56.4709	68.3248	67.3476	77.489	15.1929	11.5127	20.9343	15.7456	16.7637	14.9448
ENSG00000100867	DHRS2	74.0071	83.8297	98.0244	18388.7	18024.8	18639.5	18575.3	18490.2	18918.1	22.7894	26.4791	23.551	43.8628	29.583	32.0245
ENSG00000110987	BCL7A	173.081	207.898	178.918	151.105	149.045	171.466	158.755	161.799	143.139	89.2585	70.2272	83.737	80.9775	84.8045	99.2759
ENSG00000170498	KISS1	70.4261	53.651	76.1355	34.4184	22.6618	33.8825	20.0955	33.6738	35.5158	9.49558	21.8741	9.59487	14.6209	14.7915	12.8098
ENSG00000166582	CENPV	120.56	68.1815	65.6668	56.2448	60.1408	39.0162	39.1863	55.0279	39.8207	19.9407	23.0253	17.4452	21.3691	49.305	29.8895
ENSG00000165105	RASEF	111.011	139.716	89.4592	61.2816	82.8026	79.0592	70.3343	61.5984	92.5563	41.7806	36.8405	31.4014	41.6135	50.2911	32.0245
ENSG00000147724	FAM135B	50.1338	59.2396	78.9905	45.3316	43.5803	49.2837	38.1815	39.423	35.5158	15.1929	12.6639	12.2116	10.1222	20.7081	11.7423
ENSG00000139132	FGD4	137.271	114.008	109.445	149.426	156.018	154.011	159.759	138.802	137.758	35.1337	49.5044	44.4853	48.3616	52.2632	51.2392
ENSG00000131242	RAB11FIP4	219.634	197.838	224.6	259.398	318.136	281.328	276.313	247.215	313.185	104.451	109.37	95.9487	94.4738	102.554	93.9385
ENSG00000070190	DAPP1	121.754	116.244	105.638	0.839474	0.871606	3.08023	3.01433	5.74919	3.22871	41.7806	48.3532	28.7846	39.3641	29.583	40.5643
ENSG00000003989	SLC7A2	350.937	254.842	261.716	148.587	158.632	177.627	157.75	174.118	171.122	106.351	170.387	116.883	136.087	115.374	138.773
ENSG00000086205	FOLH1	37.0035	55.8864	43.7779	10.9132	10.4593	8.21395	6.02866	6.5705	5.38118	4.74779	9.21013	8.7226	7.87282	5.91659	7.47238
ENSG00000259207	ITGB3	125.335	72.6524	71.377	20.9869	25.2766	39.0162	30.1433	26.282	33.3633	30.3859	24.1766	19.1897	21.3691	22.6803	26.6871
ENSG00000197872	FAM49A	153.982	122.95	114.203	284.582	237.949	250.525	232.103	248.858	223.857	54.1248	43.7481	55.8247	40.4888	49.305	49.1042
ENSG00000178150	ZNF114	81.1691	97.2424	88.5075	20.9869	22.6618	14.3744	23.1098	25.4607	19.3723	25.6381	37.9918	24.4233	35.99	36.4857	32.0245
ENSG00000049540	ELN	42.9719	44.7092	58.0533	5.87632	13.9457	11.2942	6.02866	11.4984	13.9911	12.3443	9.21013	8.7226	11.2469	13.8054	14.9448
ENSG00000183943	PRKX	63.2641	64.8283	65.6668	85.6264	95.0051	98.5673	68.3248	91.1657	82.8702	18.9912	18.4203	18.3175	28.1172	20.7081	34.1595
ENSG00000185361	TNFAIP8L1	156.37	144.187	157.029	282.903	333.825	295.702	291.385	292.387	300.27	70.2673	80.5886	53.2079	75.3541	64.0964	71.5214
ENSG00000198435	NRARP	134.884	100.596	149.416	667.382	674.623	668.41	915.351	690.724	933.097	51.2762	50.6557	54.0801	42.7381	41.4162	50.1717
ENSG00000103710	RASL12	85.9437	63.7105	71.377	13.4316	15.6889	14.3744	13.0621	6.5705	23.6772	26.5876	18.4203	21.8065	21.3691	24.6525	22.4171
ENSG00000120457	KCNJ5	120.56	138.598	127.527	10.9132	6.10124	7.1872	3.01433	13.9623	3.22871	61.7213	57.5633	45.3575	56.2344	51.2772	53.3741
ENSG00000196917	HCAR1	64.4578	68.1815	68.5219	9.23422	12.2025	12.3209	12.0573	10.6771	8.60989	18.0416	27.6304	13.9562	22.4938	25.6386	34.1595
ENSG00000170579	DLGAP1	34.6162	34.6496	43.7779	0	0.871606	1.02674	1.00478	2.46394	0	5.69735	9.21013	5.23356	15.7456	3.9444	2.13497
ENSG00000115590	IL1R2	34.6162	45.8269	47.5847	11.7526	6.10124	13.3477	7.03343	7.39181	16.1435	7.59647	8.05886	10.4671	6.74813	10.8471	13.8773
ENSG00000248596	RP11-844P9.2	33.4226	71.5347	47.5847	76.3922	97.6199	74.9523	133.635	71.4542	82.8702	8.54603	9.21013	14.8284	17.995	19.722	12.8098
ENSG00000273706	LHX1	47.7465	52.5333	65.6668	39.4553	43.5803	28.7488	46.2197	33.6738	45.2019	18.0416	11.5127	15.7007	14.6209	20.7081	22.4171
ENSG00000054277	OPN3	126.528	102.831	119.913	123.403	119.41	119.102	131.626	107.592	93.6325	42.7301	62.1684	45.3575	40.4888	46.3467	54.4416
ENSG00000132874	SLC14A2	37.0035	27.9432	24.744	3.3579	0.871606	1.02674	1.00478	0.821312	3.22871	4.74779	5.75633	2.61678	2.24938	5.91659	5.33741
ENSG00000249599	BMPR1B-AS1	28.6479	38.0028	32.3576	2.51842	0.871606	2.05349	3.01433	1.64262	1.07624	0.949558	4.60506	9.59487	8.9975	11.8332	5.33741
ENSG00000135299	ANKRD6	79.9754	99.4779	106.59	99.058	97.6199	75.979	95.4537	93.6296	95.785	39.8815	34.538	44.4853	37.1147	41.4162	41.6318
ENSG00000140968	IRF8	17.9049	19.0014	20.9372	325.716	350.386	294.675	366.743	386.017	441.257	0.949558	3.4538	0	8.9975	2.9583	5.33741
ENSG00000187889	C1orf168	25.0669	22.3546	13.3237	2.51842	0	1.02674	2.00955	0.821312	3.22871	0.949558	1.15127	2.61678	2.24938	0	1.06748
ENSG00000143851	PTPN7	28.6479	24.59	17.1305	8.39474	0	10.2674	4.0191	1.64262	5.38118	4.74779	1.15127	1.74452	5.62344	2.9583	4.26993
ENSG00000143839	REN	13.1303	15.6482	15.2271	10.0737	12.2025	5.13372	3.01433	7.39181	18.296	0	1.15127	0	0	0	0
ENSG00000113356	POLR3G	82.3627	62.5928	60.9084	65.479	67.1137	54.4174	54.2579	57.4919	58.1168	28.4868	26.4791	21.8065	25.8678	17.7498	24.5521
ENSG00000227706	RP11-301G19.1	10.743	14.5305	21.8889	0.839474	0	0	0	0	0	0	1.15127	0.87226	0	0.986099	4.26993
ENSG00000157005	SST	14.324	17.8837	28.5508	68.8369	63.6273	63.6581	97.4633	82.1312	63.4979	0.949558	4.60506	0	1.12469	3.9444	5.33741
ENSG00000214814	FER1L6	34.6162	38.0028	31.4059	13.4316	18.3037	12.3209	15.0716	15.6049	6.45742	6.64691	5.75633	11.3394	6.74813	6.90269	11.7423
ENSG00000215018	COL28A1	16.7113	12.295	8.56524	7.55527	1.74321	3.08023	6.02866	4.10656	9.68613	0	0	0	0	2.9583	1.06748
ENSG00000100276	RASL10A	32.2289	13.4127	31.4059	32.7395	29.6346	21.5616	33.1576	17.2476	36.592	6.64691	2.30253	1.74452	0	5.91659	3.20245
ENSG00000262619	LINC00621	34.6162	29.061	23.7923	0.839474	1.74321	3.08023	0	0	1.07624	3.79823	5.75633	7.85034	3.37406	2.9583	9.60735
ENSG00000236098	RP11-148B18.4	52.5212	57.0042	57.1016	0	0	2.05349	0	0	0	21.8398	24.1766	9.59487	31.4913	17.7498	19.2147
ENSG00000275896	PRSS2	14.324	21.2368	16.1788	4.19737	4.35803	5.13372	2.00955	5.74919	8.60989	1.89912	2.30253	0.87226	3.37406	0.986099	6.4049
ENSG00000135525	MAP7	58.4895	63.7105	59.005	98.2185	115.052	100.621	110.525	133.053	133.453	24.6885	24.1766	22.6788	13.4963	17.7498	28.822
ENSG00000069812	HES2	34.6162	32.4141	30.4542	205.671	198.726	213.563	220.046	205.328	253.992	5.69735	10.3614	8.7226	10.1222	7.88879	12.8098
ENSG00000154646	TMPRSS15	13.1303	22.3546	17.1305	12.5921	6.97285	8.21395	11.0525	9.03444	13.9911	2.84868	1.15127	1.74452	1.12469	4.9305	4.26993
ENSG00000119888	EPCAM	82.3627	50.2978	51.3914	103.255	92.3903	91.3801	94.4489	96.0936	100.09	29.4363	17.269	20.9343	23.6184	16.7637	22.4171
ENSG00000196511	TPK1	89.5247	87.1829	73.2804	39.4553	44.4519	37.9895	50.2388	46.8148	40.897	48.4275	20.7228	36.6349	38.2394	28.5969	42.6993
ENSG00000177335	C8orf31	53.7148	64.8283	53.2948	11.7526	16.5605	13.3477	19.0907	14.7836	17.2198	20.8903	21.8741	25.2956	20.2444	17.7498	22.4171
ENSG00000177098	SCN4B	54.9085	48.0623	44.7296	56.2448	44.4519	70.8453	49.234	45.1722	52.7356	14.2434	23.0253	16.5729	23.6184	21.6942	14.9448
ENSG00000228203	RNF144A-AS1	28.6479	15.6482	26.6474	1.67895	0.871606	5.13372	1.00478	0.821312	1.07624	1.89912	6.9076	4.3613	7.87282	7.88879	4.26993
ENSG00000180440	SERTM1	84.7501	58.1219	42.8262	107.453	123.768	118.075	127.607	123.197	134.53	18.9912	26.4791	24.4233	14.6209	27.6108	16.0122
ENSG00000157322	CLEC18A	25.0669	14.5305	8.56524	4.19737	3.48643	6.16046	3.01433	0	0	2.84868	0	0.87226	1.12469	1.9722	1.06748
ENSG00000213218	CSH2	17.9049	17.8837	11.4203	5.87632	1.74321	4.10697	3.01433	2.46394	1.07624	0.949558	1.15127	2.61678	1.12469	0.986099	0
ENSG00000240241	RP11-314M24.1	8.35564	12.295	9.51693	0	0	0	0	0	0	0	0	0	1.12469	1.9722	0
ENSG00000117148	ACTL8	17.9049	17.8837	18.0822	8.39474	8.71606	7.1872	13.0621	4.92787	13.9911	1.89912	2.30253	3.48904	7.87282	4.9305	1.06748
ENSG00000233725	LINC00284	39.3909	26.8255	35.2126	0	0	2.05349	0	0	0	10.4451	10.3614	8.7226	1.12469	10.8471	7.47238
ENSG00000241697	TMEFF1	27.4542	16.7659	25.6957	66.3185	45.3235	61.6046	62.2961	46.8148	76.4128	3.79823	3.4538	6.97808	2.24938	8.87489	5.33741
ENSG00000072657	TRHDE	13.1303	17.8837	13.3237	4.19737	8.71606	2.05349	1.00478	6.5705	8.60989	0.949558	1.15127	2.61678	1.12469	3.9444	0
ENSG00000171056	SOX7	40.5845	31.2964	31.4059	5.87632	20.0469	7.1872	11.0525	12.3197	11.8386	15.1929	8.05886	7.85034	8.9975	13.8054	6.4049
ENSG00000266928	CTB-70G10.1	29.8416	36.8851	49.488	20.1474	13.0741	12.3209	14.0669	11.4984	9.68613	12.3443	16.1177	11.3394	15.7456	16.7637	12.8098
ENSG00000144152	FBLN7	31.0352	21.2368	36.1643	11.7526	19.1753	12.3209	27.129	14.7836	25.8297	5.69735	10.3614	8.7226	4.49875	8.87489	9.60735
ENSG00000001626	CFTR	31.0352	19.0014	24.744	0.839474	1.74321	0	5.02388	0.821312	1.07624	3.79823	3.4538	9.59487	8.9975	5.91659	7.47238
ENSG00000203386	LINC01317	5.96831	12.295	11.4203	8.39474	5.22964	5.13372	8.03821	4.92787	8.60989	0	0	0.87226	1.12469	0.986099	0
ENSG00000176928	GCNT4	25.0669	13.4127	8.56524	4.19737	0.871606	1.02674	1.00478	4.10656	3.22871	2.84868	1.15127	2.61678	4.49875	1.9722	1.06748
ENSG00000242574	HLA-DMB	26.2606	22.3546	27.5991	60.4421	62.7557	58.5244	65.3104	55.8492	51.6593	3.79823	8.05886	9.59487	8.9975	4.9305	2.13497
ENSG00000196482	ESRRG	51.3275	44.7092	40.9228	120.045	108.079	110.888	117.559	125.661	102.242	21.8398	17.269	19.1897	10.1222	15.7776	14.9448
ENSG00000214336	FOXI3	10.743	6.70637	22.8406	85.6264	83.6742	83.1662	96.4585	67.3476	90.4038	1.89912	2.30253	0.87226	1.12469	2.9583	2.13497
ENSG00000237742	RP11-624M8.1	22.6796	29.061	26.6474	7.55527	13.9457	9.24069	11.0525	9.85575	16.1435	9.49558	4.60506	9.59487	3.37406	4.9305	3.20245
ENSG00000086991	NOX4	41.7782	43.5914	49.488	4.19737	6.10124	6.16046	2.00955	2.46394	5.38118	13.2938	18.4203	25.2956	12.3716	14.7915	11.7423
ENSG00000196569	LAMA2	41.7782	43.5914	41.8745	15.95	7.84446	8.21395	10.0478	8.21312	12.9148	11.3947	21.8741	20.062	14.6209	12.8193	18.1472
ENSG00000250400	LINC00977	13.1303	19.0014	11.4203	0.839474	1.74321	0	0	0	0	0	5.75633	0.87226	4.49875	0	1.06748
ENSG00000154269	ENPP3	22.6796	33.5319	23.7923	0.839474	0.871606	4.10697	4.0191	4.10656	4.30494	11.3947	5.75633	8.7226	6.74813	3.9444	3.20245
ENSG00000223786	RP11-554D15.1	20.2923	25.7078	19.9856	1.67895	0	0	0	0.821312	0	7.59647	0	8.7226	2.24938	8.87489	6.4049
ENSG00000182866	LCK	8.35564	13.4127	19.9856	4.19737	1.74321	9.24069	7.03343	11.4984	4.30494	1.89912	2.30253	3.48904	3.37406	3.9444	2.13497
ENSG00000136488	CSH1	5.96831	6.70637	17.1305	2.51842	6.10124	4.10697	7.03343	6.5705	7.53365	1.89912	0	0.87226	0	0.986099	2.13497
ENSG00000140839	CLEC18B	16.7113	10.0596	14.2754	9.23422	6.10124	6.16046	3.01433	4.10656	6.45742	2.84868	4.60506	0	1.12469	3.9444	0
ENSG00000030304	MUSK	21.4859	11.1773	19.9856	2.51842	0.871606	0	0	0.821312	1.07624	4.74779	5.75633	3.48904	0	3.9444	5.33741
ENSG00000243955	GSTA1	8.35564	4.47092	17.1305	3.3579	0	5.13372	6.02866	4.10656	0	0.949558	1.15127	1.74452	0	0.986099	2.13497
ENSG00000099954	CECR2	17.9049	21.2368	20.9372	78.0711	98.4915	66.7383	78.3725	94.4509	83.9464	8.54603	6.9076	4.3613	1.12469	6.90269	5.33741
ENSG00000164651	SP8	7.16198	12.295	16.1788	96.5395	113.309	111.915	134.64	107.592	119.462	1.89912	3.4538	1.74452	2.24938	0.986099	1.06748
ENSG00000150045	KLRF1	22.6796	12.295	12.372	0	1.74321	4.10697	7.03343	4.92787	3.22871	4.74779	5.75633	4.3613	2.24938	0.986099	3.20245
ENSG00000236668	RP11-85O21.2	11.9366	6.70637	17.1305	3.3579	4.35803	10.2674	4.0191	2.46394	5.38118	5.69735	0	1.74452	0	1.9722	3.20245
ENSG00000228613	AC144450.1	8.35564	8.94183	13.3237	0	0	1.02674	1.00478	0.821312	0	4.74779	0	0.87226	1.12469	1.9722	0
ENSG00000114805	PLCH1	9.5493	11.1773	11.4203	13.4316	12.2025	13.3477	12.0573	13.141	20.4485	2.84868	2.30253	2.61678	2.24938	1.9722	1.06748
ENSG00000115705	TPO	9.5493	10.0596	10.4686	40.2948	33.121	43.1232	24.1146	42.7082	46.2782	1.89912	2.30253	2.61678	1.12469	0.986099	1.06748
