# Supplementary material for: PAX8 regulon in human ovarian cancer links lineage dependency with epigenetic vulnerability to HDAC inhibitors
Source: eLife journal article supplement (doi:10.7554/elife.44306), 2019-05-03
Supplement: supp [file elife-44306-supp-v1.zip › elife_poa_e44306_Supplementary_File_5.xlsx]

## Sheet: Table S5
Supplementary File 5. PCR primers, sgRNA sequences and siRNA sequences
PCR primers	Sequence
GAPDH-F	CATGAGAAGTATGACAACAGCCT
GAPDH-R	AGTCCTTCCACGATACCAAAGT
PAX8-F	AAGGTGGTGGAGAAGATTGG
PAX8-R	AGGGAGGTTGAATGGTTGC
FGF18-F	CTTACGGCTCACATCGTCC
FGF18-R	ACTTCCTGCTGCTGTGCTTC
CLDN16-F	GAATGCGTCACAAATGCTTTTGA
CLDN16-R	ACTTTAATGTACGGCTCATCAGG
FOLR1-F	AAAGAGCGGGTACTGAACGTG
FOLR1-R	CGCACTTGTTAAACCCTGAAGTC
SOX17-F	CAAGGGCGAGTCCCGTATC
SOX17-R	CTCTGCCTCCTCCACGAAG
WNT7A-F	CTGTGGCTGCGACAAAGAGAA
WNT7A-R	GCCGTGGCACTTACATTCC
SPON1-F	GAACCAGCTACCGCGTAACA
SPON1-R	CGTGGAGTGCTTTCAGTGACT
SLC34A2-F	CTGAGGCACCTGTAACCAAGA
SLC34A2-R	TGATCCCCGAGTCCTGAAGAG
CDH6-F	ACAGTATTCTACAGGGACAGCC
CDH6-R	CACTTGGTACTGCTCCCTGT
SOX2-F	TGGACAGTTACGCGCACAT
SOX2-R	CGAGTAGGACATGCTGTAGGT
NKX2-1-F	AGCACACGACTCCGTTCTC
NKX2-1-R	GCCCACTTTCTTGTAGCTTTCC
PAX8-ChIP-pro1-F	AGAAGAGGTACTGTCAAG
PAX8-ChIP-pro1-R	ATCCAGCAAGTTATCAGA
PAX8-ChIP-pro2-F	AATCTCATCGCATCTCAT
PAX8-ChIP-pro2-R	GATCTGATGGAGTTGTGA
PAX8-ChIP-intron2-1F	GGATGGATGGAATCTCTG
PAX8-ChIP-intron2-1R	TAACTCTGGACCTAAGGAA
PAX8-ChIP-intron2-2F	ACACCTCCACAGATATTC
PAX8-ChIP-intron2-2R	CCTGACATATTATAGAACCTTAA
PAX8-ChIP-intron5-F	CTCCAGGGCTCAGTCCAT
PAX8-ChIP-intron5-R	GAGAGGGTCAGGGAGTGA
GAPDH-ChIP-F	TACTAGCGGTTTTACGGGCG
GAPDH-ChIP-R	TCGAACAGGAGGAGCAGAGAGCGA
FGF18-ChIP-F	TAGACAGTGAGGCAGGTA
FGF18-ChIP-R	TTCCAGAGGCATAACTCC
sgRNA	Sequence
sgEGFP-F	CACCGGAAGTTCGAGGGCGACACCC
sgEGFP-R	AAACGGGTGTCGCCCTCGAACTTCC
sgPAX8-1F	CACCGAGCATCCGGCCTGGAGTGAT
sgPAX8-1R	AAACATCACTCCAGGCCGGATGCTC
sgPAX8-2F	CACCGGCAACCATTCAACCTCCCTA
sgPAX8-2R	AAACTAGGGAGGTTGAATGGTTGCC
sgHDAC1-1F	CACCGAGTAGTAACAGACTTTCCTC
sgHDAC1-1R	AAACGAGGAAAGTCTGTTACTACTC
sgHDAC1-2F	CACCGTGAGTCATGCGGATTCGGTG
sgHDAC1-2R	AAACCACCGAATCCGCATGACTCAC
sgHDAC2-1F	CACCGTCCGTAATGTTGCTCGATGT
sgHDAC2-1R	AAACACATCGAGCAACATTACGGAC
sgHDAC2-2F	CACCGTACAACAGATCGTGTAATGA
sgHDAC2-2R	AAACTCATTACACGATCTGTTGTAC
sgHDAC3-1F	CACCGTATTTCTACGACCCCGACGT
sgHDAC3-1R	AAACACGTCGGGGTCGTAGAAATAC
sgHDAC3-2F	CACCGTCTTATAGAGACCGTAATGC
sgHDAC3-2R	AAACGCATTACGGTCTCTATAAGAC
sgCLDN16-F	CACCGCTGACACCCGCCACTTAAGT
sgCLDN16-R	AAACACTTAAGTGGCGGGTGTCAGC
sgSOX17-F	CACCGGTTCATCGGCCGCCGGATAC
sgSOX17-R	AAACGTATCCGGCGGCCGATGAACC
sgWNT7A-F	CACCGGCATGGTCTACCTCCGGAT
sgwNT7A-R	AAACATCCGGAGGTAGACCATGCC
sgCDH6-F	CACCGAGGATCCGATTATCAGTATG
sgCDH6-R	AAACCATACTGATAATCGGATCCTC
sgSLC34A2-F	CACCGCTCATCTATCAGTGTAGCCG
sgSLC34A2-R	AAACCGGCTACACTGATAGATGAGC
sgSPON1-F	CACCGCGACCCCGACTTCTACAAGC
sgSPON1-R	AAACGCTTGTAGAAGTCGGGGTCGC
sgFOLR1-F	CACCGAGTTGGGGGAGCACTCGTAG
sgFOLR1-R	AAACCTACGAGTGCTCCCCCAACTC
sgFGF18-F	CACCGAGCTCTACAGCCGGACCAGT
sgFGF18-R	AAACACTGGTCCGGCTGTAGAGCTC
siRNA	Sequence
scramble siRNA	UUCUUCGAACGUGUCACGUTT
siPAX8-1	GUCAGCUCCAUUAAUAGAATT
siPAX8-2	CGAGCAGGAAGUGAAUACUTT
