# Supplementary material for: PAX8 regulon in human ovarian cancer links lineage dependency with epigenetic vulnerability to HDAC inhibitors
Source: eLife journal article supplement (doi:10.7554/elife.44306), 2019-05-03
Supplement: supp [file elife_poa_e44306_Supplementary_File_1.xlsx]

## Sheet: Table S1
Supplementary File 1. Cancer outlier genes
Gene	RPKM	colFold	rowFold	Cell line	Tissue
ANPEP	277.053	395.043	1469.25	HCC1576	Other
AXL	404.396	576.619	73.7116	HCC1576	Other
BHMT2	46.784	66.7083	4678.4	HCC1576	Other
BIRC3	120.508	171.829	39.4504	HCC1576	Other
C10orf55	217.838	310.61	93.3049	HCC1576	Other
C15orf48	188.997	269.487	311.201	HCC1576	Other
CDA	66.4052	94.6857	58.2344	HCC1576	Other
CITED4	107.317	153.021	50.1631	HCC1576	Other
COL5A1	59.8102	85.282	67.8148	HCC1576	Other
COL5A2	83.547	119.128	177.709	HCC1576	Other
DDX3Y	59.2974	84.5508	5929.74	HCC1576	Other
DNER	64.9886	92.6657	139.539	HCC1576	Other
EFEMP1	223.206	318.264	151.203	HCC1576	Other
EIF1AY	69.7389	99.4391	6973.89	HCC1576	Other
FBLN2	47.3314	67.4888	709.466	HCC1576	Other
FSTL1	503.048	717.285	39.9842	HCC1576	Other
IGFBP7	425.648	606.922	80.5736	HCC1576	Other
IL6	52.5478	74.9267	434.342	HCC1576	Other
KISS1	70.0293	99.8532	475.722	HCC1576	Other
KRT7	439.997	627.382	62.5183	HCC1576	Other
L1CAM	139.709	199.208	38.438	HCC1576	Other
LOC100288181	57.9571	82.6397	153.849	HCC1576	Other
LOC100505813	461.205	657.621	279.459	HCC1576	Other
LOC100506941	190.408	271.499	212.344	HCC1576	Other
LOC255130	126.927	180.983	126.708	HCC1576	Other
LY6K	271.03	386.456	536.146	HCC1576	Other
MIR147B	964.335	1375.02	309.885	HCC1576	Other
MIR198	2100.67	2995.3	45.2164	HCC1576	Other
MIR3606	70.1928	100.086	7019.28	HCC1576	Other
MYL9	176.254	251.316	39.7031	HCC1576	Other
NNMT	125.09	178.362	206.788	HCC1576	Other
PLAC8	49.9362	71.2029	50.769	HCC1576	Other
PLAU	598.767	853.768	93.419	HCC1576	Other
RBP7	46.1455	65.7979	286.945	HCC1576	Other
RPS4Y1	190.852	272.131	3882.62	HCC1576	Other
SERPINE1	263.528	375.758	108.061	HCC1576	Other
SPARC	309.236	440.933	262.275	HCC1576	Other
SRGN	547.517	780.692	735.321	HCC1576	Other
TGFB2	62.8836	89.6642	34.9109	HCC1576	Other
TGM2	263.977	376.399	36.6876	HCC1576	Other
ACAP1	38.0285	87.9282	89.7447	A3/KAW	Other
ACTL8	44.7601	103.493	276.908	A3/KAW	Other
AIM2	94.7431	219.062	1904.77	A3/KAW	Other
AQP3	195.622	452.311	84.4154	A3/KAW	Other
ARHGAP30	47.0059	108.686	142.732	A3/KAW	Other
BRDT	50.9188	117.733	5091.88	A3/KAW	Other
C5orf58	34.1638	78.9923	3416.38	A3/KAW	Other
CA9	30.6476	70.8624	104.416	A3/KAW	Other
CCDC169-SOHLH2	57.1512	132.143	195.565	A3/KAW	Other
CCL3	41.9326	96.9553	4193.26	A3/KAW	Other
CCR2	49.9835	115.57	4998.35	A3/KAW	Other
CD247	47.0153	108.707	975.818	A3/KAW	Other
CD28	44.5532	103.015	4455.32	A3/KAW	Other
CD4	86.98	201.112	1531.38	A3/KAW	Other
CD48	64.9652	150.21	6496.52	A3/KAW	Other
COCH	71.6625	165.696	35.9641	A3/KAW	Other
COL6A3	185.008	427.769	3267.23	A3/KAW	Other
CSAG1	39.3805	91.0543	404.974	A3/KAW	Other
CTAG2	66.5281	153.824	4224.88	A3/KAW	Other
CYTIP	68.3927	158.135	2214.78	A3/KAW	Other
DOK2	27.6994	64.0457	2769.94	A3/KAW	Other
FAM46C	223.701	517.234	532.345	A3/KAW	Other
FBP1	60.6771	140.296	398.963	A3/KAW	Other
FMR1NB	42.3876	98.0073	4238.76	A3/KAW	Other
GATM	62.762	145.116	112.4	A3/KAW	Other
GLDC	50.9643	117.838	121.46	A3/KAW	Other
GMFG	95.6819	221.233	372.918	A3/KAW	Other
GPAT2	34.5999	80.0007	98.2332	A3/KAW	Other
GTSF1	159.893	369.7	5146.32	A3/KAW	Other
HBE1	47.4732	109.766	1400.05	A3/KAW	Other
HRASLS2	49.5274	114.516	258.722	A3/KAW	Other
ICAM2	31.7375	73.3824	65.057	A3/KAW	Other
IGJ	1581.33	3656.3	111261	A3/KAW	Other
IGLC1	1392.15	3218.89	139215	A3/KAW	Other
IGLL5	749.843	1733.76	74984.3	A3/KAW	Other
IKZF3	28.8576	66.7236	1211.57	A3/KAW	Other
IL10	43.0487	99.5359	4304.87	A3/KAW	Other
IL2RB	100.995	233.516	3220.46	A3/KAW	Other
IQGAP2	31.0413	71.7728	75.7472	A3/KAW	Other
IRF4	386.807	894.363	21798.8	A3/KAW	Other
ITGAL	46.6209	107.795	1208.51	A3/KAW	Other
ITGB7	72.7233	168.148	164.693	A3/KAW	Other
JSRP1	79.9744	184.914	629.854	A3/KAW	Other
LCP1	154.355	356.895	74.1958	A3/KAW	Other
LEF1	28.9382	66.9101	37.1564	A3/KAW	Other
LOC100128098	28.1762	65.1481	118.889	A3/KAW	Other
LOC100291796	48.2786	111.628	4827.86	A3/KAW	Other
LOC100505727	58.2086	134.588	2582.23	A3/KAW	Other
LOC100506071	69.3577	160.367	39.7342	A3/KAW	Other
LOC100506305	28.1482	65.0834	1018.89	A3/KAW	Other
LOC100506928	45.5696	105.365	1551.72	A3/KAW	Other
LSP1	141.565	327.321	4342.95	A3/KAW	Other
MAGEA1	36.6317	84.6987	1515.49	A3/KAW	Other
MAGEA12	30.9962	71.6685	405.933	A3/KAW	Other
MAGEA4	439.488	1016.17	43948.8	A3/KAW	Other
MAP4K1	61.4836	142.16	258.606	A3/KAW	Other
MFNG	50.9463	117.796	114.161	A3/KAW	Other
MIR142	54.6643	126.393	5466.43	A3/KAW	Other
MIR550A2	45.0174	104.088	4501.74	A3/KAW	Other
MIR550B2	45.0174	104.088	4501.74	A3/KAW	Other
MZB1	408.349	944.172	7335.54	A3/KAW	Other
PAGE5	182.87	422.827	18287	A3/KAW	Other
PDIA2	30.0087	69.3851	354.841	A3/KAW	Other
PIK3CG	50.38	116.487	5038	A3/KAW	Other
PIM2	863.979	1997.66	145.737	A3/KAW	Other
POU2AF1	172.411	398.642	13278.5	A3/KAW	Other
PRDM1	50.9062	117.704	107.293	A3/KAW	Other
PRSS21	85.8753	198.558	5520.14	A3/KAW	Other
RAB33A	44.2881	102.401	336.86	A3/KAW	Other
RCN3	58.0192	134.15	40.6611	A3/KAW	Other
RGS16	102.558	237.13	89.7576	A3/KAW	Other
SELPLG	175.152	404.98	611.029	A3/KAW	Other
SLC38A5	401.153	927.533	1469.91	A3/KAW	Other
SLC47A1	27.9792	64.6925	66.7222	A3/KAW	Other
SNORD116-19	31.1475	72.0182	33.1817	A3/KAW	Other
SNORD116-23	29.4363	68.0616	82.3219	A3/KAW	Other
SNORD116-6	29.5583	68.3438	64.5167	A3/KAW	Other
SOHLH2	68.4892	158.358	823.803	A3/KAW	Other
SPESP1	39.186	90.6047	3918.6	A3/KAW	Other
SPINK2	51.0621	118.064	1454.93	A3/KAW	Other
SRGN	519.538	1201.26	697.746	A3/KAW	Other
SSTR3	75.1055	173.657	7510.55	A3/KAW	Other
SSX1	82.2595	190.198	5639.64	A3/KAW	Other
TEX11	33.197	76.757	3319.7	A3/KAW	Other
TEX19	256.236	592.461	994.464	A3/KAW	Other
TFRC	8528.38	19719.1	82.9124	A3/KAW	Other
TNFRSF17	153.409	354.707	15340.9	A3/KAW	Other
TRPV2	31.9948	73.9773	96.5033	A3/KAW	Other
TUBA3C	116.853	270.184	11685.3	A3/KAW	Other
UCHL1	410.574	949.317	80.3974	A3/KAW	Other
UTS2R	37.433	86.5513	2885.52	A3/KAW	Other
ABCA6	24.6265	79.6401	2462.65	TMD8	Lymphoid
ABCB4	26.3253	100.821	493.641	Daudi	Lymphoid
ABCG1	21.0105	80.4659	48.0083	Daudi	Lymphoid
ABI3	13.9248	73.2947	721.263	RAMOS	Lymphoid
ABI3	18.082	69.2505	936.599	Daudi	Lymphoid
ABI3	19.292	98.2161	999.269	HS-Sultan	Lymphoid
ABI3	27.9634	94.4476	1448.43	WSU-NHL	Lymphoid
ABI3	30.8175	168.26	1596.26	KARPAS-422	Lymphoid
ABI3	43.3872	190.973	2247.34	RAJI	Lymphoid
ABI3	45.0297	106.808	2332.41	Jiyoye	Lymphoid
ABI3	52.1493	298.706	2701.19	Farage	Lymphoid
ABI3	64.7539	77.9708	3354.07	CCRF-SB	Lymphoid
ABP1	59.3659	72.5593	1634.54	THP-1	Lymphoid
ACAP1	14.0371	76.6409	33.1268	KARPAS-422	Lymphoid
ACAP1	20.3886	83.9662	48.1158	NU-DUL-1	Lymphoid
ACAP1	20.5994	108.428	48.6133	RAMOS	Lymphoid
ACAP1	24.3689	101.382	57.5089	EB-3	Lymphoid
ACAP1	27.18	76.172	64.143	HL-60	Lymphoid
ACAP1	28.3982	80.859	67.0179	PL-21	Lymphoid
ACAP1	29.2925	85.9808	69.1285	GA-10	Lymphoid
ACAP1	31.1674	119.365	73.5532	Daudi	Lymphoid
ACAP1	38.6425	66.6929	91.1938	OCI-AML2	Lymphoid
ACAP1	44.0593	224.308	103.977	HS-Sultan	Lymphoid
ACAP1	44.4029	96.2449	104.788	AMO-1	Lymphoid
ACAP1	47.1618	270.139	111.299	Farage	Lymphoid
ACAP1	49.5789	75.5451	117.003	HEL	Lymphoid
ACAP1	50.5671	152.547	119.335	CA46	Lymphoid
ACAP1	53.7196	96.2168	126.775	U-937	Lymphoid
ACAP1	55.3788	88.6101	130.69	KMS-21BM	Lymphoid
ACAP1	58.0059	255.319	136.89	RAJI	Lymphoid
ACAP1	60.8399	148.365	143.578	HNT-34	Lymphoid
ACAP1	61.6018	106.803	145.376	EB2	Lymphoid
ACAP1	77.3154	183.388	182.459	Jiyoye	Lymphoid
ACAP1	82.3981	99.2165	194.454	CCRF-SB	Lymphoid
ACAP1	85.7017	125.674	202.251	UKE-1	Lymphoid
ACAP1	89.6409	276.669	211.547	SR-786	Lymphoid
ACAP1	90.4499	132.106	213.456	Jurkat, Clone E6-1	Lymphoid
ACE	80.6979	196.791	407.59	HNT-34	Lymphoid
ACP5	13.5341	71.2387	48.6495	RAMOS	Lymphoid
ACP5	16.7564	85.3074	60.2321	HS-Sultan	Lymphoid
ACPP	25.8692	79.843	193.594	SR-786	Lymphoid
ACSBG1	71.5406	100.631	633.697	KU812	Lymphoid
ACSM3	186.346	325.837	74.6081	K-562	Lymphoid
ACTL8	53.5357	73.3154	331.198	KARPAS-620	Lymphoid
ACTL8	89.3925	95.0188	553.026	OCI-M2	Lymphoid
ACTL8	126.843	260.796	784.714	KMS-12-BM	Lymphoid
ACTL8	184.367	357.436	1140.58	A4/Fuk	Lymphoid
ACTL8	225.686	680.831	1396.2	CA46	Lymphoid
ACY3	17.79	68.1322	93.134	Daudi	Lymphoid
ACY3	24.9441	126.991	130.587	HS-Sultan	Lymphoid
ACY3	28.1737	84.9922	147.495	CA46	Lymphoid
ACY3	31.8039	167.404	166.499	RAMOS	Lymphoid
ACY3	73.1894	100.231	383.16	KARPAS-620	Lymphoid
ADA	590.723	862.775	64.4136	Jurkat, Clone E6-1	Lymphoid
ADAM19	170.811	527.194	45.2789	SR-786	Lymphoid
ADAM23	12.5611	66.117	34.4068	RAMOS	Lymphoid
ADAM23	20.7365	79.4168	56.8006	Daudi	Lymphoid
ADAM23	43.1893	79.4037	118.302	KMS-26	Lymphoid
ADAM23	113.1	209.452	309.798	KMS-27	Lymphoid
ADAM23	114.582	182.628	313.858	RPMI 8226	Lymphoid
ADAM23	118.236	230.815	323.867	L-363	Lymphoid
ADAM23	126.233	196.571	345.772	EJM	Lymphoid
ADAM32	25.6744	105.735	204.832	NU-DUL-1	Lymphoid
ADAM8	69.7399	170.069	66.815	HNT-34	Lymphoid
ADAM8	69.7797	129.226	66.8531	KMS-27	Lymphoid
ADAM8	83.9294	144.426	80.4094	MM.1	Lymphoid
ADAMTS14	72.5632	126.881	624.469	K-562	Lymphoid
ADAMTSL4	100.085	175.005	95.7699	K-562	Lymphoid
ADCY1	67.1558	124.367	275.954	KMS-27	Lymphoid
ADCYAP1	50.0853	70.3283	5008.53	MOLM-16	Lymphoid
ADCYAP1	57.2332	98.2501	5723.32	KG-1	Lymphoid
ADD2	50.5342	155.969	307.07	SR-786	Lymphoid
ADD2	55.1623	77.5928	335.193	KU812	Lymphoid
ADORA2A	23.2012	126.675	32.5702	KARPAS-422	Lymphoid
ADORA2A	31.8082	102.865	44.6528	TMD8	Lymphoid
ADORA2A	43.3385	220.638	60.8392	HS-Sultan	Lymphoid
ADORA2A	53.0491	106.129	74.471	U-2932	Lymphoid
ADORA2A	58.775	139.411	82.5091	Jiyoye	Lymphoid
ADORA2A	58.9922	259.66	82.814	RAJI	Lymphoid
ADPRH	20.7839	119.048	34.1553	Farage	Lymphoid
ADTRP	20.9428	67.7274	107.13	TMD8	Lymphoid
ADTRP	45.6874	83.9965	233.708	KMS-26	Lymphoid
ADTRP	53.8356	83.1981	275.388	MOLP-2	Lymphoid
AEBP1	21.6625	99.0591	191.692	TK	Lymphoid
AEBP1	34.7613	112.415	307.604	TMD8	Lymphoid
AEBP1	46.1148	174.306	408.072	NAMALWA	Lymphoid
AEBP1	66.084	272.153	584.78	NU-DUL-1	Lymphoid
AEBP1	90.9454	132.829	804.78	Jurkat, Clone E6-1	Lymphoid
AEBP1	93.3698	226.398	826.233	SUP-B15	Lymphoid
AEBP1	139.812	255.463	1237.2	SCC-3	Lymphoid
AEBP1	348.501	790.535	3083.9	NALM-6	Lymphoid
AFAP1-AS1	97.1929	155.516	53.1964	KMS-21BM	Lymphoid
AFF2	12.4837	68.1594	1248.37	KARPAS-422	Lymphoid
AFF2	17.2618	71.815	1726.18	EB-3	Lymphoid
AFF3	23.0104	86.9751	360.955	NAMALWA	Lymphoid
AFF3	26.2289	108.018	411.442	NU-DUL-1	Lymphoid
AGT	38.1154	65.3816	895.359	KMS-34	Lymphoid
AGT	52.225	90.135	1226.8	OCI-AML2	Lymphoid
AGT	85.9487	244.724	2019	PL-21	Lymphoid
AGT	94.4431	115.432	2218.54	THP-1	Lymphoid
AGT	122.645	141.328	2881.03	U266B1	Lymphoid
AICDA	18.3244	80.6569	1832.44	RAJI	Lymphoid
AICDA	31.5711	92.6692	3157.11	GA-10	Lymphoid
AICDA	31.784	95.8833	3178.4	CA46	Lymphoid
AICDA	36.6459	192.89	3664.59	RAMOS	Lymphoid
AICDA	36.9009	151.969	3690.09	NU-DUL-1	Lymphoid
AICDA	38.5389	196.203	3853.89	HS-Sultan	Lymphoid
AICDA	69.1161	223.516	6911.61	TMD8	Lymphoid
AICDA	95.5023	360.981	9550.23	NAMALWA	Lymphoid
AICDA	120.232	500.204	12023.2	EB-3	Lymphoid
AICDA	124.236	475.8	12423.6	Daudi	Lymphoid
AIF1	32.033	108.193	1232.86	WSU-NHL	Lymphoid
AIF1	41.7087	70.782	1605.25	Kasumi-1	Lymphoid
AIF1	50.7449	90.8889	1953.03	U-937	Lymphoid
AIF1	53.0756	77.5191	2042.73	Jurkat, Clone E6-1	Lymphoid
AIF1	53.1002	98.921	2043.68	SIG-M5	Lymphoid
AIF1	54.0364	96.1646	2079.71	OCI-AML3	Lymphoid
AIF1	61.3831	102.454	2362.46	MV-4-11	Lymphoid
AIF1	67.5	105.907	2597.88	OCI-AML5	Lymphoid
AIF1	75.0144	91.6855	2887.09	THP-1	Lymphoid
AIF1	96.2054	166.041	3702.67	OCI-AML2	Lymphoid
AIF1	120.316	183.33	4630.62	HEL	Lymphoid
AIF1	134.963	378.233	5194.32	HL-60	Lymphoid
AIF1	139.295	396.62	5361.09	PL-21	Lymphoid
AIF1	141.289	114.625	5437.83	SKM-1	Lymphoid
AIF1	149.322	364.139	5746.99	HNT-34	Lymphoid
AIF1	161.935	277.989	6232.43	KG-1	Lymphoid
AIF1	228.789	335.498	8805.44	UKE-1	Lymphoid
AIM2	23.1316	96.2353	465.053	EB-3	Lymphoid
AIM2	25.627	86.5564	515.222	WSU-NHL	Lymphoid
AIM2	32.9826	167.916	663.102	HS-Sultan	Lymphoid
AIM2	38.4488	145.329	772.999	NAMALWA	Lymphoid
AIM2	49.8554	190.936	1002.32	Daudi	Lymphoid
AIM2	49.9177	146.521	1003.58	GA-10	Lymphoid
AIM2	56.8293	325.513	1142.53	Farage	Lymphoid
AIM2	59.5002	183.642	1196.23	SR-786	Lymphoid
AIM2	89.6693	289.983	1802.77	TMD8	Lymphoid
AIM2	104.988	191.832	2110.74	SCC-3	Lymphoid
AKAP5	20.935	119.914	43.5054	Farage	Lymphoid
AKR1C1	64.4122	76.1597	83.4545	SET-2	Lymphoid
ALAS2	36.6634	64.1082	1558.65	K-562	Lymphoid
ALAS2	77.3879	82.2587	3289.94	OCI-M2	Lymphoid
ALB	45.8099	141.388	4580.99	SR-786	Lymphoid
ALDH1A1	43.0615	75.2957	111.812	K-562	Lymphoid
ALDH1A1	53.9527	75.8914	140.092	KU812	Lymphoid
ALDH1A1	56.2987	286.619	146.184	HS-Sultan	Lymphoid
ALDH1A1	61.3151	93.4281	159.209	HEL	Lymphoid
ALDH1A1	68.7988	167.774	178.641	HNT-34	Lymphoid
ALDH1A1	71.1107	99.8515	184.644	MOLM-16	Lymphoid
ALDH1A1	100.588	147.503	261.183	UKE-1	Lymphoid
ALDH1A1	303.745	359.142	788.695	SET-2	Lymphoid
ALDH1A2	17.2006	79.7571	1063.17	RC-K8	Lymphoid
ALDH1A2	82.8049	120.94	5118.18	Jurkat, Clone E6-1	Lymphoid
ALDH1A2	90.8103	158.787	5612.99	K-562	Lymphoid
ALDH1L2	38.1257	82.6389	64.6545	AMO-1	Lymphoid
ALDH1L2	38.5094	64.2761	65.3051	MV-4-11	Lymphoid
ALDH1L2	41.679	95.595	70.6801	OPM-2	Lymphoid
ALDH1L2	45.0055	77.6748	76.3212	OCI-AML2	Lymphoid
ALDH1L2	63.3411	117.302	107.415	KMS-27	Lymphoid
ALDH1L2	64.0078	94.886	108.546	KMS-28PE	Lymphoid
ALDH1L2	76.0848	107.486	129.026	SK-MM-2	Lymphoid
ALDH1L2	82.2226	148.361	139.435	KMS-28BM	Lymphoid
ALDH1L2	101.578	174.242	172.258	KMS-34	Lymphoid
ALDH1L2	144.311	281.719	244.726	L-363	Lymphoid
ALDH5A1	140.321	423.309	33.7381	CA46	Lymphoid
ALDOC	319.782	559.158	33.8694	K-562	Lymphoid
ALK	57.4996	177.467	3930.1	SR-786	Lymphoid
ALOX5	25.9912	136.808	391.612	RAMOS	Lymphoid
ALOX5	27.9492	82.0379	421.114	GA-10	Lymphoid
ALOX5	30.0787	172.288	453.199	Farage	Lymphoid
ALOX5	30.6804	69.5951	462.265	NALM-6	Lymphoid
ALOX5	31.5879	160.815	475.938	HS-Sultan	Lymphoid
ALOX5	32.5854	143.428	490.967	RAJI	Lymphoid
ALOX5	33.2512	100.309	500.999	CA46	Lymphoid
ALOX5	34.044	141.634	512.944	EB-3	Lymphoid
ALOX5	39.1961	150.113	590.571	Daudi	Lymphoid
ALOX5	43.9321	76.1681	661.93	EB2	Lymphoid
ALOX5	50.1291	206.446	755.3	NU-DUL-1	Lymphoid
ALOX5	51.8096	236.917	780.621	TK	Lymphoid
ALOX5	195.421	1066.97	2944.42	KARPAS-422	Lymphoid
ALOX5AP	19.3881	88.6589	129.12	TK	Lymphoid
ALOX5AP	38.7229	70.7539	257.885	SCC-3	Lymphoid
ALOX5AP	40.9569	72.888	272.764	OCI-AML3	Lymphoid
ALOX5AP	43.1314	102.305	287.245	Jiyoye	Lymphoid
ALOX5AP	43.1559	247.193	287.408	Farage	Lymphoid
ALOX5AP	43.4023	66.1337	289.049	HEL	Lymphoid
ALOX5AP	43.7845	75.1633	291.595	KG-1	Lymphoid
ALOX5AP	45.1229	77.8774	300.508	OCI-AML2	Lymphoid
ALOX5AP	48.9289	143.618	325.855	GA-10	Lymphoid
ALOX5AP	50.4805	265.71	336.188	RAMOS	Lymphoid
ALOX5AP	59.1772	301.273	394.106	HS-Sultan	Lymphoid
ALOX5AP	60.5631	266.575	403.336	RAJI	Lymphoid
ALOX5AP	65.0682	121.216	433.339	SIG-M5	Lymphoid
ALOX5AP	65.4596	269.582	435.946	NU-DUL-1	Lymphoid
ALOX5AP	66.0537	110.25	439.902	MV-4-11	Lymphoid
ALOX5AP	66.6695	255.331	444.003	Daudi	Lymphoid
ALOX5AP	68.1217	283.409	453.674	EB-3	Lymphoid
ALOX5AP	70.0441	196.299	466.477	HL-60	Lymphoid
ALOX5AP	72.0945	233.148	480.133	TMD8	Lymphoid
ALOX5AP	75.7736	164.242	504.635	AMO-1	Lymphoid
ALOX5AP	80.0158	302.445	532.887	NAMALWA	Lymphoid
ALOX5AP	82.5649	143.148	549.863	EB2	Lymphoid
ALOX5AP	93.2079	281.182	620.743	CA46	Lymphoid
ALOX5AP	114.218	623.618	760.668	KARPAS-422	Lymphoid
ALOX5AP	290.805	828.018	1936.69	PL-21	Lymphoid
ALPK2	38.1097	68.6031	1295.3	KMM-1	Lymphoid
ALPK2	42.8735	79.3982	1457.22	KMS-27	Lymphoid
ALPK2	62.7748	93.0582	2133.64	KMS-28PE	Lymphoid
ALPL	256.571	468.803	2979.11	SCC-3	Lymphoid
ALX1	50.05	86.381	3759.14	OCI-AML2	Lymphoid
AMHR2	44.2516	77.3766	191.689	K-562	Lymphoid
AMICA1	13.1328	69.1261	1313.28	RAMOS	Lymphoid
AMICA1	15.4063	64.0952	1540.63	EB-3	Lymphoid
AMICA1	29.7386	96.1722	2973.86	TMD8	Lymphoid
AMICA1	47.4883	86.77	4748.83	SCC-3	Lymphoid
AMICA1	56.3598	137.44	5635.98	HNT-34	Lymphoid
AMN	22.0743	66.592	68.4942	CA46	Lymphoid
AMPD1	29.9579	71.2258	510.16	JJN-3	Lymphoid
AMPD1	44.9374	83.2203	765.251	KMS-27	Lymphoid
AMPD1	50.4867	75.8693	859.751	MOLP-8	Lymphoid
AMPD1	61.0804	118.418	1040.15	A4/Fuk	Lymphoid
AMPD1	61.4074	80.9333	1045.72	LP-1	Lymphoid
AMPD1	69.386	111.023	1181.59	KMS-21BM	Lymphoid
ANGPT1	42.1924	64.29	560.352	HEL	Lymphoid
ANGPT1	61.3279	149.555	814.488	HNT-34	Lymphoid
ANGPT1	68.9406	118.348	915.592	KG-1	Lymphoid
ANGPT1	71.6425	76.1517	951.475	OCI-M2	Lymphoid
ANGPT1	73.2225	107.374	972.458	UKE-1	Lymphoid
ANGPTL6	213.106	226.519	85.4645	OCI-M2	Lymphoid
ANK1	63.9764	110.77	278.946	OCI-M1	Lymphoid
ANK1	74.056	103.987	322.895	MOLM-16	Lymphoid
ANK1	81.5793	96.4578	355.698	SET-2	Lymphoid
ANK1	202.06	284.223	881.01	KU812	Lymphoid
ANKLE1	14.0391	76.6519	36.7615	KARPAS-422	Lymphoid
ANKLE1	17.5464	67.1992	45.9452	Daudi	Lymphoid
ANKLE1	18.6852	86.6408	48.9271	RC-K8	Lymphoid
ANKLE1	26.7839	117.892	70.1335	RAJI	Lymphoid
ANKLE1	28.9255	119.124	75.7415	NU-DUL-1	Lymphoid
ANKLE1	31.2479	64.2472	81.8226	KMS-12-BM	Lymphoid
ANKLE1	34.3075	174.661	89.8341	HS-Sultan	Lymphoid
ANKLE1	35.788	117.31	93.7109	KHM-1B	Lymphoid
ANKLE1	36.7477	65.8185	96.2237	U-937	Lymphoid
ANKLE1	44.758	235.589	117.199	RAMOS	Lymphoid
ANKLE1	50.2658	70.7052	131.621	KU812	Lymphoid
ANKRD22	28.1364	86.8405	515.538	SR-786	Lymphoid
ANKRD30A	67.7263	132.213	6772.64	L-363	Lymphoid
ANKRD36BP2	16.3126	71.8016	1318.7	RAJI	Lymphoid
ANKRD36BP2	26.3658	99.658	2131.4	NAMALWA	Lymphoid
ANKRD36BP2	30.0544	158.195	2429.59	RAMOS	Lymphoid
ANKRD36BP2	33.1428	66.3051	2679.25	U-2932	Lymphoid
ANKRD36BP2	42.8452	76.0394	3463.59	KMS-11	Lymphoid
ANKRD36BP2	47.4755	143.22	3837.9	CA46	Lymphoid
ANKRD36BP2	47.9894	74.1633	3879.44	MOLP-2	Lymphoid
ANKRD36BP2	59.005	173.194	4769.94	GA-10	Lymphoid
ANKRD36BP2	59.7155	276.893	4827.38	RC-K8	Lymphoid
ANKRD36BP2	70.9244	271.626	5733.5	Daudi	Lymphoid
ANKRD36BP2	75.1664	139.202	6076.43	KMS-27	Lymphoid
ANKRD36BP2	102.801	145.229	8310.39	SK-MM-2	Lymphoid
ANKRD36BP2	118.096	195.291	9546.84	Pfeiffer	Lymphoid
ANKRD36BP2	145.748	226.96	11782.3	EJM	Lymphoid
ANO7	25.3571	71.0635	53.0313	HL-60	Lymphoid
ANPEP	34.6788	98.742	183.907	PL-21	Lymphoid
ANPEP	43.2897	74.3139	229.572	KG-1	Lymphoid
ANPEP	58.3226	68.9595	309.294	SET-2	Lymphoid
ANPEP	88.6339	135.055	470.04	HEL	Lymphoid
ANPEP	100.537	180.07	533.161	U-937	Lymphoid
ANPEP	127.735	357.977	677.397	HL-60	Lymphoid
ANPEP	140.731	172.006	746.317	THP-1	Lymphoid
ANPEP	142.197	346.764	754.094	HNT-34	Lymphoid
AOAH	113.286	206.995	5088.29	SCC-3	Lymphoid
APBA2	37.9122	67.4695	37.9192	OCI-AML3	Lymphoid
APBA2	43.9168	66.9176	43.9249	HEL	Lymphoid
APBB1IP	16.8089	96.2799	817.677	Farage	Lymphoid
APBB1IP	27.5433	65.3311	1339.86	Jiyoye	Lymphoid
APBB1IP	28.9618	94.9346	1408.86	KHM-1B	Lymphoid
APBB1IP	40.0105	86.7242	1946.33	AMO-1	Lymphoid
APBB1IP	40.6288	69.693	1976.41	KMS-34	Lymphoid
APBB1IP	45.3845	69.154	2207.75	HEL	Lymphoid
APBB1IP	46.8341	68.4031	2278.27	Jurkat, Clone E6-1	Lymphoid
APBB1IP	48.0959	244.858	2339.65	HS-Sultan	Lymphoid
APBB1IP	50.576	163.559	2460.3	TMD8	Lymphoid
APBB1IP	50.943	115.558	2478.15	NALM-6	Lymphoid
APBB1IP	51.8679	89.0397	2523.14	KG-1	Lymphoid
APBB1IP	52.5439	231.278	2556.02	RAJI	Lymphoid
APBB1IP	52.9712	289.216	2576.81	KARPAS-422	Lymphoid
APBB1IP	55.1225	252.067	2681.46	TK	Lymphoid
APBB1IP	56.6195	129.863	2754.28	OPM-2	Lymphoid
APBB1IP	61.8449	81.5098	3008.47	LP-1	Lymphoid
APBB1IP	63.0731	213.032	3068.22	WSU-NHL	Lymphoid
APBB1IP	69.8217	139.685	3396.51	U-2932	Lymphoid
APBB1IP	70.4314	128.691	3426.17	SCC-3	Lymphoid
APBB1IP	71.5255	209.945	3479.39	GA-10	Lymphoid
APBB1IP	76.5177	185.536	3722.24	SUP-B15	Lymphoid
APBB1IP	80.296	422.648	3906.04	RAMOS	Lymphoid
APBB1IP	85.8627	328.837	4176.83	Daudi	Lymphoid
APBB1IP	86.1386	259.856	4190.25	CA46	Lymphoid
APBB1IP	106.416	180.594	5176.65	Kasumi-1	Lymphoid
APBB1IP	119.326	451.031	5804.68	NAMALWA	Lymphoid
APBB1IP	126.104	519.331	6134.37	NU-DUL-1	Lymphoid
APBB1IP	135.292	562.858	6581.33	EB-3	Lymphoid
APOBEC3D	16.0824	92.1185	36.1758	Farage	Lymphoid
APOBEC3G	30.1174	132.565	38.5577	RAJI	Lymphoid
APOBEC3G	45.3461	107.812	58.0541	JJN-3	Lymphoid
APOBEC3G	46.8952	179.599	60.0373	Daudi	Lymphoid
APOBEC3G	53.3936	121.117	68.3569	NALM-6	Lymphoid
APOBEC3G	58.6042	77.2388	75.0277	LP-1	Lymphoid
APOBEC3G	68.6365	82.646	87.8715	CCRF-SB	Lymphoid
APOBEC3G	70.8693	168.098	90.7301	Jiyoye	Lymphoid
APOBEC3G	83.8992	480.567	107.411	Farage	Lymphoid
APOBR	24.2421	67.9387	284.704	HL-60	Lymphoid
APOBR	47.0966	73.8941	553.111	OCI-AML5	Lymphoid
APOBR	52.2196	76.5753	613.276	UKE-1	Lymphoid
APOBR	55.2322	98.2926	648.656	OCI-AML3	Lymphoid
APOBR	61.6007	150.22	723.449	HNT-34	Lymphoid
APOBR	100.524	286.224	1180.57	PL-21	Lymphoid
APOC1	238.269	335.156	99.2943	KU812	Lymphoid
APOC1	438.54	615.785	182.753	MOLM-16	Lymphoid
APOC1	558.14	975.941	232.594	K-562	Lymphoid
APOC1	665.673	707.57	277.407	OCI-M2	Lymphoid
APOC1	906.57	1071.91	377.796	SET-2	Lymphoid
APOC1	983.478	1702.81	409.846	OCI-M1	Lymphoid
APOC2	40.6387	72.7877	1552.48	U-937	Lymphoid
APOC2	47.5032	133.128	1814.71	HL-60	Lymphoid
APOC2	68.992	105.126	2635.63	HEL	Lymphoid
APOC2	182.447	314.884	6969.83	OCI-AML2	Lymphoid
APOC2	196.682	359.374	7513.63	SCC-3	Lymphoid
APOC2	315.618	385.761	12057.2	THP-1	Lymphoid
APOC2	629.848	1051.28	24061.4	MV-4-11	Lymphoid
APOC4-APOC2	72.7447	125.55	3198.08	OCI-AML2	Lymphoid
APOC4-APOC2	78.3931	143.239	3446.4	SCC-3	Lymphoid
APOC4-APOC2	125.842	153.81	5532.43	THP-1	Lymphoid
APOC4-APOC2	251.469	419.727	11055.4	MV-4-11	Lymphoid
APOE	348.831	609.952	289.112	K-562	Lymphoid
APOE	402.824	565.634	333.862	MOLM-16	Lymphoid
APOE	672.709	1164.74	557.543	OCI-M1	Lymphoid
APOE	687.345	730.606	569.674	OCI-M2	Lymphoid
APOE	1102.24	1303.27	913.541	SET-2	Lymphoid
APOL3	14.9552	65.827	39.4919	RAJI	Lymphoid
APOL3	20.5318	117.605	54.2179	Farage	Lymphoid
APOL4	38.694	66.9955	871.166	OCI-M1	Lymphoid
AQP3	75.4922	99.4966	32.5766	LP-1	Lymphoid
AQP3	85.5197	185.367	36.9037	AMO-1	Lymphoid
AQP3	89.5429	134.561	38.6398	MOLP-8	Lymphoid
AQP3	90.8514	208.377	39.2045	OPM-2	Lymphoid
AQP3	115.607	198.937	49.8872	MM.1	Lymphoid
AQP3	119.335	231.358	51.4958	A4/Fuk	Lymphoid
AQP3	123.825	169.575	53.4334	KARPAS-620	Lymphoid
AQP3	145.133	248.955	62.6282	KMS-34	Lymphoid
AQP3	170.293	350.131	73.4854	KMS-12-BM	Lymphoid
AQP3	241.348	372.981	104.147	MOLP-2	Lymphoid
AQP9	36.6946	67.0479	3669.46	SCC-3	Lymphoid
ARHGAP15	19.2832	79.4137	1042.53	NU-DUL-1	Lymphoid
ARHGAP15	20.8066	96.4776	1124.89	RC-K8	Lymphoid
ARHGAP15	21.2258	93.4277	1147.56	RAJI	Lymphoid
ARHGAP15	24.5557	112.29	1327.59	TK	Lymphoid
ARHGAP15	27.6743	140.891	1496.19	HS-Sultan	Lymphoid
ARHGAP15	29.2661	82.0185	1582.25	HL-60	Lymphoid
ARHGAP15	30.6687	74.3638	1658.08	SUP-B15	Lymphoid
ARHGAP15	30.8271	162.262	1666.64	RAMOS	Lymphoid
ARHGAP15	31.4466	180.124	1700.14	Farage	Lymphoid
ARHGAP15	31.5705	74.8835	1706.84	Jiyoye	Lymphoid
ARHGAP15	36.1491	122.095	1954.37	WSU-NHL	Lymphoid
ARHGAP15	44.6647	137.854	2414.76	SR-786	Lymphoid
ARHGAP15	45.1109	80.7978	2438.88	U-937	Lymphoid
ARHGAP15	47.1562	178.242	2549.46	NAMALWA	Lymphoid
ARHGAP15	47.4271	88.3525	2564.11	SIG-M5	Lymphoid
ARHGAP15	48.0594	141.066	2598.29	GA-10	Lymphoid
ARHGAP15	48.7747	86.8008	2636.97	OCI-AML3	Lymphoid
ARHGAP15	48.9002	158.139	2643.75	TMD8	Lymphoid
ARHGAP15	49.982	86.6572	2702.24	EB2	Lymphoid
ARHGAP15	50.5103	85.7189	2730.8	Kasumi-1	Lymphoid
ARHGAP15	51.5171	75.5451	2785.23	UKE-1	Lymphoid
ARHGAP15	53.33	81.2609	2883.24	HEL	Lymphoid
ARHGAP15	54.282	296.372	2934.71	KARPAS-422	Lymphoid
ARHGAP15	58.9183	177.74	3185.37	CA46	Lymphoid
ARHGAP15	65.4666	113.35	3539.4	OCI-M1	Lymphoid
ARHGAP15	65.9508	92.6062	3565.58	MOLM-16	Lymphoid
ARHGAP15	67.3177	257.813	3639.48	Daudi	Lymphoid
ARHGAP15	68.4807	107.445	3702.35	OCI-AML5	Lymphoid
ARHGAP15	76.3688	317.72	4128.82	EB-3	Lymphoid
ARHGAP15	79.3268	136.91	4288.74	OCI-AML2	Lymphoid
ARHGAP15	94.8701	270.126	5129.07	PL-21	Lymphoid
ARHGAP15	120.04	206.068	6489.85	KG-1	Lymphoid
ARHGAP22	51.7208	126.127	100.53	HNT-34	Lymphoid
ARHGAP24	22.8832	74.0024	37.6573	TMD8	Lymphoid
ARHGAP25	12.2721	64.596	113.093	RAMOS	Lymphoid
ARHGAP25	20.4405	84.18	188.369	NU-DUL-1	Lymphoid
ARHGAP25	32.8711	65.7616	302.922	U-2932	Lymphoid
ARHGAP25	40.4297	66.8573	372.578	Pfeiffer	Lymphoid
ARHGAP25	41.2771	225.367	380.387	KARPAS-422	Lymphoid
ARHGAP25	43.805	106.823	403.683	HNT-34	Lymphoid
ARHGAP25	45.2827	77.7352	417.301	KG-1	Lymphoid
ARHGAP25	46.5582	266.681	429.055	Farage	Lymphoid
ARHGAP25	73.4997	248.248	677.333	WSU-NHL	Lymphoid
ARHGAP25	90.5252	419.754	834.231	RC-K8	Lymphoid
ARHGAP25	126.17	408.024	1162.72	TMD8	Lymphoid
ARHGAP30	32.3443	64.7076	98.2124	U-2932	Lymphoid
ARHGAP30	33.4571	152.994	101.592	TK	Lymphoid
ARHGAP30	33.6899	82.1567	102.298	HNT-34	Lymphoid
ARHGAP30	36.7482	152.885	111.585	EB-3	Lymphoid
ARHGAP30	37.0134	103.73	112.39	HL-60	Lymphoid
ARHGAP30	38.783	130.991	117.764	WSU-NHL	Lymphoid
ARHGAP30	39.8814	113.556	121.099	PL-21	Lymphoid
ARHGAP30	41.0734	93.1703	124.718	NALM-6	Lymphoid
ARHGAP30	41.1713	99.83	125.016	SUP-B15	Lymphoid
ARHGAP30	43.5961	202.15	132.378	RC-K8	Lymphoid
ARHGAP30	44.7436	68.1774	135.863	HEL	Lymphoid
ARHGAP30	45.7549	71.2497	138.933	EJM	Lymphoid
ARHGAP30	47.3705	79.0662	143.839	MV-4-11	Lymphoid
ARHGAP30	47.9126	210.892	145.485	RAJI	Lymphoid
ARHGAP30	48.0503	89.5135	145.903	SIG-M5	Lymphoid
ARHGAP30	48.9354	147.624	148.591	CA46	Lymphoid
ARHGAP30	49.8451	89.2772	151.353	U-937	Lymphoid
ARHGAP30	50.3741	192.922	152.959	Daudi	Lymphoid
ARHGAP30	50.4681	265.645	153.245	RAMOS	Lymphoid
ARHGAP30	51.0051	120.981	154.876	Jiyoye	Lymphoid
ARHGAP30	51.8812	167.78	157.536	TMD8	Lymphoid
ARHGAP30	53.5746	70.6098	162.678	LP-1	Lymphoid
ARHGAP30	54.2319	105.141	164.674	A4/Fuk	Lymphoid
ARHGAP30	54.321	80.5261	164.944	KMS-28PE	Lymphoid
ARHGAP30	55.0266	94.9702	167.087	OCI-AML2	Lymphoid
ARHGAP30	57.3739	102.104	174.214	OCI-AML3	Lymphoid
ARHGAP30	58.254	333.674	176.887	Farage	Lymphoid
ARHGAP30	58.7069	139.578	178.262	JJN-3	Lymphoid
ARHGAP30	59.6763	102.444	181.206	KG-1	Lymphoid
ARHGAP30	60.2126	328.753	182.834	KARPAS-422	Lymphoid
ARHGAP30	62.4352	97.96	189.583	OCI-AML5	Lymphoid
ARHGAP30	64.2168	94.1681	194.993	UKE-1	Lymphoid
ARHGAP30	64.5915	118.752	196.13	KMS-26	Lymphoid
ARHGAP30	65.5192	247.65	198.947	NAMALWA	Lymphoid
ARHGAP30	65.8929	271.366	200.082	NU-DUL-1	Lymphoid
ARHGAP30	66.3312	121.2	201.413	SCC-3	Lymphoid
ARHGAP30	66.9365	130.671	203.251	L-363	Lymphoid
ARHGAP30	68.3937	348.195	207.676	HS-Sultan	Lymphoid
ARHGAP30	72.6554	106.116	220.616	Jurkat, Clone E6-1	Lymphoid
ARHGAP30	73.8316	151.801	224.187	KMS-12-BM	Lymphoid
ARHGAP30	75.295	139.44	228.631	KMS-27	Lymphoid
ARHGAP30	76.862	105.26	233.389	KARPAS-620	Lymphoid
ARHGAP30	79.2594	244.627	240.669	SR-786	Lymphoid
ARHGAP30	83.219	142.75	252.692	KMS-34	Lymphoid
ARHGAP30	89.867	109.839	272.878	THP-1	Lymphoid
ARHGAP30	89.905	103.601	272.994	U266B1	Lymphoid
ARHGAP30	97.1881	117.025	295.109	CCRF-SB	Lymphoid
ARHGAP30	104.314	179.504	316.746	MM.1	Lymphoid
ARHGAP30	109.492	169.21	332.469	MOLP-2	Lymphoid
ARHGAP30	121.306	215.288	368.343	KMS-11	Lymphoid
ARHGAP30	121.456	210.577	368.798	EB2	Lymphoid
ARHGAP30	122.045	279.922	370.585	OPM-2	Lymphoid
ARHGAP30	128.176	231.279	389.204	KMS-28BM	Lymphoid
ARHGAP30	133.246	391.11	404.597	GA-10	Lymphoid
ARHGAP30	134.379	440.485	408.039	KHM-1B	Lymphoid
ARHGAP30	166.147	265.848	504.502	KMS-21BM	Lymphoid
ARHGAP30	232.484	503.917	705.93	AMO-1	Lymphoid
ARHGAP4	44.552	77.2428	34.1118	EB2	Lymphoid
ARHGAP4	46.618	68.0875	35.6936	Jurkat, Clone E6-1	Lymphoid
ARHGAP4	47.3385	155.172	36.2453	KHM-1B	Lymphoid
ARHGAP4	47.9418	197.438	36.7072	NU-DUL-1	Lymphoid
ARHGAP4	48.0592	88.3571	36.7971	KMS-26	Lymphoid
ARHGAP4	49.1621	69.4522	37.6416	SK-MM-2	Lymphoid
ARHGAP4	49.4453	85.3375	37.8584	OCI-AML2	Lymphoid
ARHGAP4	50.0379	85.833	38.3121	KMS-34	Lymphoid
ARHGAP4	50.4128	90.9637	38.5991	KMS-28BM	Lymphoid
ARHGAP4	50.803	66.957	38.8979	LP-1	Lymphoid
ARHGAP4	52.2671	83.6312	40.0189	KMS-21BM	Lymphoid
ARHGAP4	53.9739	93.4514	41.3257	OCI-M1	Lymphoid
ARHGAP4	57.2986	98.5994	43.8713	MM.1	Lymphoid
ARHGAP4	59.4266	68.4794	45.5007	U266B1	Lymphoid
ARHGAP4	59.8354	123.024	45.8136	KMS-12-BM	Lymphoid
ARHGAP4	60.1844	136.522	46.0809	NALM-6	Lymphoid
ARHGAP4	61.4491	140.94	47.0492	OPM-2	Lymphoid
ARHGAP4	61.9167	109.886	47.4073	KMS-11	Lymphoid
ARHGAP4	64.7626	157.931	49.5862	HNT-34	Lymphoid
ARHGAP4	67.4559	114.477	51.6484	Kasumi-1	Lymphoid
ARHGAP4	67.9286	104.978	52.0103	MOLP-2	Lymphoid
ARHGAP4	68.8478	84.1485	52.7141	THP-1	Lymphoid
ARHGAP4	70.6096	117.854	54.0631	MV-4-11	Lymphoid
ARHGAP4	74.4104	116.749	56.9732	OCI-AML5	Lymphoid
ARHGAP4	75.2151	133.855	57.5893	OCI-AML3	Lymphoid
ARHGAP4	90.159	143.701	69.0313	RPMI 8226	Lymphoid
ARHGAP4	90.4529	253.495	69.2563	HL-60	Lymphoid
ARHGAP4	92.0196	157.967	70.4559	KG-1	Lymphoid
ARHGAP4	93.9943	168.353	71.9678	U-937	Lymphoid
ARHGAP4	96.5946	132.283	73.9588	KARPAS-620	Lymphoid
ARHGAP4	101.318	288.486	77.5754	PL-21	Lymphoid
ARHGAP4	105.027	155.694	80.4155	KMS-28PE	Lymphoid
ARHGAP4	106.271	155.836	81.3674	UKE-1	Lymphoid
ARHGAP4	111.338	217.35	85.2473	L-363	Lymphoid
ARHGAP4	120.438	224.365	92.2147	SIG-M5	Lymphoid
ARHGAP4	142.389	216.964	109.022	HEL	Lymphoid
ARHGAP44	21.6034	117.952	34.9985	KARPAS-422	Lymphoid
ARHGAP9	11.6692	66.84	167.882	Farage	Lymphoid
ARHGAP9	12.1755	64.0872	175.167	RAMOS	Lymphoid
ARHGAP9	15.8241	80.5613	227.659	HS-Sultan	Lymphoid
ARHGAP9	35.4637	100.977	510.211	PL-21	Lymphoid
ARHGAP9	40.6273	70.1185	584.498	OCI-AML2	Lymphoid
ARHGAP9	41.1918	100.451	592.619	HNT-34	Lymphoid
ARHGAP9	49.113	72.0198	706.58	UKE-1	Lymphoid
ARHGDIB	396.798	687.955	32.6331	EB2	Lymphoid
ARHGDIB	400.927	1764.73	32.9728	RAJI	Lymphoid
ARHGDIB	404.396	616.193	33.258	HEL	Lymphoid
ARHGDIB	425.859	345.49	35.0232	SKM-1	Lymphoid
ARHGDIB	442.142	1051.21	36.3623	JJN-3	Lymphoid
ARHGDIB	481.996	1093.35	39.64	NALM-6	Lymphoid
ARHGDIB	490.925	580.46	40.3743	SET-2	Lymphoid
ARHGDIB	493.081	2286.36	40.5516	RC-K8	Lymphoid
ARHGDIB	509.171	1494.54	41.8749	GA-10	Lymphoid
ARHGDIB	516.885	1745.8	42.5093	WSU-NHL	Lymphoid
ARHGDIB	530.214	1292.99	43.6055	HNT-34	Lymphoid
ARHGDIB	532.746	2013.68	43.8137	NAMALWA	Lymphoid
ARHGDIB	537.494	962.701	44.2042	U-937	Lymphoid
ARHGDIB	538.018	657.587	44.2473	THP-1	Lymphoid
ARHGDIB	559.771	1810.25	46.0363	TMD8	Lymphoid
ARHGDIB	573.12	972.618	47.1341	Kasumi-1	Lymphoid
ARHGDIB	602.16	2306.15	49.5224	Daudi	Lymphoid
ARHGDIB	605.692	1245.33	49.8129	KMS-12-BM	Lymphoid
ARHGDIB	613.095	1023.32	50.4218	MV-4-11	Lymphoid
ARHGDIB	619.711	1066.4	50.9658	MM.1	Lymphoid
ARHGDIB	630.959	885.974	51.8909	MOLM-16	Lymphoid
ARHGDIB	701.009	2114.75	57.6519	CA46	Lymphoid
ARHGDIB	709.149	853.894	58.3213	CCRF-SB	Lymphoid
ARHGDIB	727.349	2995.43	59.8181	NU-DUL-1	Lymphoid
ARHGDIB	748.83	3812.32	61.5848	HS-Sultan	Lymphoid
ARHGDIB	792.264	4538.02	65.1568	Farage	Lymphoid
ARHGDIB	808.18	1959.63	66.4658	SUP-B15	Lymphoid
ARHGDIB	821.584	3418.06	67.5681	EB-3	Lymphoid
ARHGDIB	828.989	1210.77	68.1772	Jurkat, Clone E6-1	Lymphoid
ARHGDIB	838.513	1492.24	68.9604	OCI-AML3	Lymphoid
ARHGDIB	913.426	4807.94	75.1214	RAMOS	Lymphoid
ARHGDIB	919.98	1587.79	75.6603	OCI-AML2	Lymphoid
ARHGDIB	1058.99	2967.82	87.0926	HL-60	Lymphoid
ARHGDIB	1140.93	1673.07	93.8317	UKE-1	Lymphoid
ARHGDIB	1199.33	2234.24	98.6343	SIG-M5	Lymphoid
ARHGDIB	1387.73	2177.33	114.129	OCI-AML5	Lymphoid
ARHGDIB	2416.1	6879.45	198.704	PL-21	Lymphoid
ARHGEF6	21.5859	109.895	52.9658	HS-Sultan	Lymphoid
ARHGEF6	26.86	76.4792	65.9069	PL-21	Lymphoid
ARHGEF6	32.4875	148.56	79.7153	TK	Lymphoid
ARHGEF6	33.4248	98.1101	82.0152	GA-10	Lymphoid
ARHGEF6	37.7908	116.638	92.7282	SR-786	Lymphoid
ARHGEF6	38.4455	202.363	94.3347	RAMOS	Lymphoid
ARHGEF6	42.44	160.415	104.136	NAMALWA	Lymphoid
ARHGEF6	44.5591	74.3735	109.336	MV-4-11	Lymphoid
ARHGEF6	45.9979	81.8591	112.866	OCI-AML3	Lymphoid
ARHGEF6	46.2542	139.536	113.495	CA46	Lymphoid
ARHGEF6	46.2598	86.1778	113.509	SIG-M5	Lymphoid
ARHGEF6	46.3132	129.793	113.64	HL-60	Lymphoid
ARHGEF6	46.8461	65.7799	114.947	MOLM-16	Lymphoid
ARHGEF6	47.1467	73.9725	115.685	OCI-AML5	Lymphoid
ARHGEF6	48.9327	119.328	120.067	HNT-34	Lymphoid
ARHGEF6	56.6904	233.468	139.103	NU-DUL-1	Lymphoid
ARHGEF6	62.2463	111.489	152.735	U-937	Lymphoid
ARHGEF6	66.0014	113.912	161.949	OCI-AML2	Lymphoid
ARHGEF6	66.9248	278.429	164.215	EB-3	Lymphoid
ARHGEF6	74.4512	180.525	182.683	SUP-B15	Lymphoid
ARHGEF6	76.3918	111.573	187.444	Jurkat, Clone E6-1	Lymphoid
ARHGEF6	88.2419	151.482	216.521	KG-1	Lymphoid
ARHGEF6	107.3	163.497	263.285	HEL	Lymphoid
ARHGEF6	111.141	192.431	272.708	OCI-M1	Lymphoid
ARHGEF6	165.853	243.209	406.958	UKE-1	Lymphoid
ARID5A	155.901	268.274	46.6859	MM.1	Lymphoid
ASB2	25.0827	116.306	383.366	RC-K8	Lymphoid
ASB2	40.5599	206.492	619.919	HS-Sultan	Lymphoid
ASB2	41.6966	238.834	637.293	Farage	Lymphoid
ASB2	41.7837	77.3799	638.624	KMS-27	Lymphoid
ASB2	83.6951	282.684	1279.2	WSU-NHL	Lymphoid
ASGR2	44.2194	80.7972	4421.94	SCC-3	Lymphoid
ASGR2	52.803	93.9696	5280.3	OCI-AML3	Lymphoid
ATF5	928.33	3002.14	36.9384	TMD8	Lymphoid
ATF5	1009.85	2020.3	40.1822	U-2932	Lymphoid
ATHL1	221.06	312.295	49.183	SK-MM-2	Lymphoid
ATP10A	32.6452	79.6091	2383.48	HNT-34	Lymphoid
ATP1A3	59.4293	134.809	41.0221	NALM-6	Lymphoid
ATP1A3	65.5919	288.71	45.276	RAJI	Lymphoid
ATP2A3	57.231	80.3621	34.4082	MOLM-16	Lymphoid
ATP2A3	59.8278	103.728	35.9695	EB2	Lymphoid
ATP2A3	60.9223	199.699	36.6275	KHM-1B	Lymphoid
ATP2A3	61.3579	234.988	36.8894	Daudi	Lymphoid
ATP2A3	67.409	104.175	40.5274	MOLP-2	Lymphoid
ATP2A3	72.7697	203.937	43.7503	HL-60	Lymphoid
ATP2A3	74.3902	176.449	44.7246	Jiyoye	Lymphoid
ATP2A3	74.5632	88.162	44.8286	SET-2	Lymphoid
ATP2A3	75.6762	215.475	45.4977	PL-21	Lymphoid
ATP2A3	79.2775	179.832	47.6629	NALM-6	Lymphoid
ATP2A3	81.7666	86.913	49.1594	OCI-M2	Lymphoid
ATP2A3	85.281	146.399	51.2723	KG-1	Lymphoid
ATP2A3	97.5798	167.915	58.6666	MM.1	Lymphoid
ATP2A3	101.996	519.265	61.3216	HS-Sultan	Lymphoid
ATP2A3	103.038	164.868	61.9481	KMS-21BM	Lymphoid
ATP2A3	105.44	160.662	63.3921	HEL	Lymphoid
ATP2A3	106.027	578.894	63.7452	KARPAS-422	Lymphoid
ATP2A3	114.467	156.759	68.8194	KARPAS-620	Lymphoid
ATP2A3	114.769	279.878	69.0012	HNT-34	Lymphoid
ATP2A3	123.227	507.483	74.0859	NU-DUL-1	Lymphoid
ATP2A3	140.134	453.182	84.2509	TMD8	Lymphoid
ATP2A3	149.408	219.093	89.8264	UKE-1	Lymphoid
ATP2A3	167.353	244.426	100.615	Jurkat, Clone E6-1	Lymphoid
ATP8A1	23.889	125.743	40.9646	RAMOS	Lymphoid
ATP8A1	30.6458	92.4499	52.5512	CA46	Lymphoid
ATP8A1	34.0341	141.593	58.3614	EB-3	Lymphoid
ATP8A1	39.3724	150.788	67.5154	Daudi	Lymphoid
ATP8B4	23.5485	65.9947	829.454	HL-60	Lymphoid
ATP8B4	26.8419	65.4571	945.461	HNT-34	Lymphoid
ATP8B4	43.5933	77.5797	1535.5	OCI-AML3	Lymphoid
ATP8B4	49.1093	84.7576	1729.79	OCI-AML2	Lymphoid
AZGP1	34.1899	103.141	141.78	CA46	Lymphoid
AZGP1	42.3104	65.8859	175.454	EJM	Lymphoid
AZGP1	42.9168	73.6177	177.969	KMS-34	Lymphoid
AZGP1	116.818	226.477	484.423	A4/Fuk	Lymphoid
AZGP1	153.599	216.991	636.948	SK-MM-2	Lymphoid
AZU1	76.5035	120.033	1899.24	OCI-AML5	Lymphoid
AZU1	208.469	584.235	5175.36	HL-60	Lymphoid
AZU1	261.69	436.786	6496.6	MV-4-11	Lymphoid
AZU1	335.355	596.807	8325.39	OCI-AML3	Lymphoid
AZU1	361.442	647.377	8973.01	U-937	Lymphoid
AZU1	392.508	318.433	9744.25	SKM-1	Lymphoid
AZU1	484.112	821.566	12018.4	Kasumi-1	Lymphoid
AZU1	544.205	1013.81	13510.2	SIG-M5	Lymphoid
AZU1	568.416	981.027	14111.2	OCI-AML2	Lymphoid
AZU1	1329.79	3786.36	33012.9	PL-21	Lymphoid
AZU1	3312.22	4048.32	82227.7	THP-1	Lymphoid
B3GNT7	23.6554	66.2944	57.5567	HL-60	Lymphoid
B3GNT7	45.9322	76.6655	111.759	MV-4-11	Lymphoid
BACH2	35.5232	146.295	149.29	NU-DUL-1	Lymphoid
BACH2	35.6305	162.933	149.741	TK	Lymphoid
BACH2	44.8962	101.842	188.681	NALM-6	Lymphoid
BACH2	50.2701	147.555	211.266	GA-10	Lymphoid
BACH2	53.3994	271.858	224.417	HS-Sultan	Lymphoid
BACH2	56.3404	296.555	236.777	RAMOS	Lymphoid
BACH2	77.4424	322.186	325.46	EB-3	Lymphoid
BACH2	92.8349	350.899	390.149	NAMALWA	Lymphoid
BACH2	106.026	406.057	445.584	Daudi	Lymphoid
BACH2	115.004	346.935	483.317	CA46	Lymphoid
BAGE	29.7134	97.3982	2971.34	KHM-1B	Lymphoid
BAGE2	21.6205	70.8703	2162.05	KHM-1B	Lymphoid
BAGE3	21.6205	70.8703	2162.05	KHM-1B	Lymphoid
BAGE4	22.1509	72.609	2215.09	KHM-1B	Lymphoid
BAGE5	22.1509	72.609	2215.09	KHM-1B	Lymphoid
BANK1	18.1152	92.2254	111.789	HS-Sultan	Lymphoid
BANK1	28.1985	153.96	174.013	KARPAS-422	Lymphoid
BANK1	38.106	158.533	235.152	EB-3	Lymphoid
BANK1	45.5198	174.332	280.903	Daudi	Lymphoid
BANK1	69.1507	124.774	426.729	KMS-28BM	Lymphoid
BANK1	93.5157	138.629	577.085	KMS-28PE	Lymphoid
BARX1	87.368	106.785	2568.71	THP-1	Lymphoid
BARX2	38.8361	69.9106	246.52	KMM-1	Lymphoid
BARX2	77.7562	133.803	493.573	MM.1	Lymphoid
BATF	28.2371	124.288	314.881	RAJI	Lymphoid
BATF	33.983	69.8707	378.956	KMS-12-BM	Lymphoid
BATF	36.684	65.7045	409.076	U-937	Lymphoid
BATF	40.6785	70.5271	453.62	EB2	Lymphoid
BATF	43.8179	250.985	488.628	Farage	Lymphoid
BATF	56.387	160.552	628.791	PL-21	Lymphoid
BATF	56.7617	89.0584	632.969	OCI-AML5	Lymphoid
BATF	59.3868	71.5082	662.242	CCRF-SB	Lymphoid
BATF	63.9806	216.097	713.47	WSU-NHL	Lymphoid
BATF	69.2471	321.09	772.198	RC-K8	Lymphoid
BATF	113.491	367.021	1265.58	TMD8	Lymphoid
BATF	145.812	266.427	1626	SCC-3	Lymphoid
BATF	154.484	476.801	1722.71	SR-786	Lymphoid
BATF	234.713	556.726	2617.37	Jiyoye	Lymphoid
BATF	277.627	459.102	3095.91	Pfeiffer	Lymphoid
BATF2	118.907	232.126	238.221	L-363	Lymphoid
BATF2	376.49	565.773	754.268	MOLP-8	Lymphoid
BATF3	49.5034	91.6761	56.7341	KMS-27	Lymphoid
BATF3	103.664	189.413	118.805	SCC-3	Lymphoid
BATF3	285.434	880.966	327.126	SR-786	Lymphoid
BCHE	58.1312	112.701	701.975	A4/Fuk	Lymphoid
BCHE	88.0708	136.106	1063.52	MOLP-2	Lymphoid
BCHE	120.752	170.588	1458.16	SK-MM-2	Lymphoid
BCL11A	12.5006	68.2517	76.2193	KARPAS-422	Lymphoid
BCL2	33.2604	107.561	32.3332	TMD8	Lymphoid
BCL2	33.5813	147.812	32.6452	RAJI	Lymphoid
BCL2	40.7422	70.3169	39.6065	OCI-AML2	Lymphoid
BCL2	40.9454	84.1857	39.804	KMS-12-BM	Lymphoid
BCL2	49.8987	77.114	48.5077	MOLP-2	Lymphoid
BCL2	55.0161	119.249	53.4825	AMO-1	Lymphoid
BCL2	56.4238	110.148	54.8509	L-363	Lymphoid
BCL2	62.3559	285.144	60.6177	TK	Lymphoid
BCL2	63.5071	83.7007	61.7368	LP-1	Lymphoid
BCL2	254.487	359.519	247.393	SK-MM-2	Lymphoid
BCL2	273.635	547.431	266.007	U-2932	Lymphoid
BCL2A1	21.6984	66.9702	315.595	SR-786	Lymphoid
BCL2A1	22.6278	99.5987	329.113	RAJI	Lymphoid
BCL2A1	44.0405	125.398	640.553	PL-21	Lymphoid
BCL2A1	55.6836	96.5425	809.897	EB2	Lymphoid
BCL2A1	56.4472	67.9687	821.004	CCRF-SB	Lymphoid
BCL2A1	59.9453	277.959	871.882	RC-K8	Lymphoid
BCL2A1	97.1604	328.163	1413.16	WSU-NHL	Lymphoid
BCL2A1	98.4474	196.953	1431.88	U-2932	Lymphoid
BCL2A1	131.385	240.065	1910.95	SCC-3	Lymphoid
BCL2A1	196.279	324.579	2854.8	Pfeiffer	Lymphoid
BCL2A1	209.021	675.955	3040.13	TMD8	Lymphoid
BCL2A1	395.266	2264.05	5749	Farage	Lymphoid
BCL6	188.044	1026.7	47.9551	KARPAS-422	Lymphoid
BEND4	12.8144	73.3996	1281.44	Farage	Lymphoid
BEND4	17.2197	65.0872	1721.97	NAMALWA	Lymphoid
BEST3	18.0837	68.3531	372.77	NAMALWA	Lymphoid
BEST3	19.9064	81.9803	410.342	NU-DUL-1	Lymphoid
BEST3	26.1296	137.537	538.625	RAMOS	Lymphoid
BEST3	31.8518	96.088	656.58	CA46	Lymphoid
BEST3	61.9806	257.86	1277.64	EB-3	Lymphoid
BEX1	57.7124	84.2913	2416.29	Jurkat, Clone E6-1	Lymphoid
BEX1	59.596	167.018	2495.15	HL-60	Lymphoid
BEX1	96.1316	117.496	4024.81	THP-1	Lymphoid
BEX1	102.565	171.192	4294.18	MV-4-11	Lymphoid
BEX1	179.148	333.738	7500.54	SIG-M5	Lymphoid
BEX1	226.082	404.934	9465.54	U-937	Lymphoid
BEX1	364.884	649.357	15276.9	OCI-AML3	Lymphoid
BEX4	50.4369	93.9595	53.4506	SIG-M5	Lymphoid
BEX4	51.1023	74.9368	54.1557	UKE-1	Lymphoid
BEX4	53.731	84.3033	56.9415	OCI-AML5	Lymphoid
BEX4	71.1716	123.228	75.4242	OCI-M1	Lymphoid
BEX4	83.4644	88.7176	88.4516	OCI-M2	Lymphoid
BEX4	89.6459	136.597	95.0024	HEL	Lymphoid
BEX4	103.35	180.714	109.525	K-562	Lymphoid
BFSP2	13.0099	66.2338	141.243	HS-Sultan	Lymphoid
BFSP2	13.512	73.7736	146.694	KARPAS-422	Lymphoid
BHLHA15	40.7928	69.9743	68.6531	KMS-34	Lymphoid
BHLHA15	47.1279	64.5401	79.3148	KARPAS-620	Lymphoid
BHLHA15	50.314	80.5061	84.6769	KMS-21BM	Lymphoid
BHLHA15	50.4334	80.3836	84.8779	RPMI 8226	Lymphoid
BHLHA15	54.8024	82.3548	92.2308	MOLP-8	Lymphoid
BHLHA15	54.8618	72.3063	92.3307	LP-1	Lymphoid
BHLHA15	57.495	106.476	96.7624	KMS-27	Lymphoid
BHLHA15	59.2643	115.693	99.7401	L-363	Lymphoid
BHLHA15	93.5422	306.624	157.429	KHM-1B	Lymphoid
BHLHA15	98.802	139.579	166.281	SK-MM-2	Lymphoid
BHLHA15	121.886	188.364	205.131	MOLP-2	Lymphoid
BHLHE22	43.9763	78.0469	4397.63	KMS-11	Lymphoid
BHLHE22	57.4952	136.697	5749.52	JJN-3	Lymphoid
BHLHE22	79.0978	96.6764	7909.78	THP-1	Lymphoid
BHLHE41	50.5048	86.6339	33.2672	KMS-34	Lymphoid
BHLHE41	50.8495	164.443	33.4942	TMD8	Lymphoid
BHLHE41	54.8713	112.818	36.1433	KMS-12-BM	Lymphoid
BHLHE41	67.8	104.779	44.6594	MOLP-2	Lymphoid
BIK	118.525	623.871	37.6871	RAMOS	Lymphoid
BIK	136.241	780.374	43.3201	Farage	Lymphoid
BIK	146.716	430.649	46.6511	GA-10	Lymphoid
BIN2	21.667	71.0227	1153.29	KHM-1B	Lymphoid
BIN2	32.1664	78.4415	1712.15	HNT-34	Lymphoid
BIN2	32.3317	70.08	1720.95	AMO-1	Lymphoid
BIN2	36.0926	64.2314	1921.14	OCI-AML3	Lymphoid
BIN2	37.6235	64.5868	2002.62	KG-1	Lymphoid
BIN2	42.5707	97.6402	2265.95	OPM-2	Lymphoid
BIN2	42.8569	74.2032	2281.19	OCI-M1	Lymphoid
BIN2	49.4718	76.4542	2633.28	MOLP-2	Lymphoid
BIN2	50.0144	90.2449	2662.17	KMS-28BM	Lymphoid
BIN2	51.1685	75.034	2723.6	UKE-1	Lymphoid
BIN2	54.8254	76.9842	2918.25	MOLM-16	Lymphoid
BIN2	64.053	125.042	3409.42	L-363	Lymphoid
BIN2	70.0835	199.551	3730.41	PL-21	Lymphoid
BIN2	72.4281	124.634	3855.2	MM.1	Lymphoid
BIN2	88.2159	151.322	4695.55	KMS-34	Lymphoid
BIN2	127.76	213.245	6800.42	MV-4-11	Lymphoid
BIN2	140.656	242.758	7486.85	OCI-AML2	Lymphoid
BIN2	163.405	248.986	8697.73	HEL	Lymphoid
BIN2	176.148	276.374	9376	OCI-AML5	Lymphoid
BIRC3	102.933	453.069	33.6969	RAJI	Lymphoid
BIRC3	115.721	214.306	37.8835	KMS-27	Lymphoid
BIRC3	117.803	279.421	38.5649	Jiyoye	Lymphoid
BIRC3	124.556	205.973	40.7756	Pfeiffer	Lymphoid
BIRC3	153.424	238.912	50.2262	EJM	Lymphoid
BIRC3	159.839	915.545	52.3264	Farage	Lymphoid
BIRC3	199.195	473.593	65.2102	JJN-3	Lymphoid
BIRC7	42.1216	66.0883	1010.13	OCI-AML5	Lymphoid
BLK	24.3788	113.041	893.971	RC-K8	Lymphoid
BLK	29.4047	168.427	1078.27	Farage	Lymphoid
BLK	46.7868	194.649	1715.68	EB-3	Lymphoid
BLK	46.998	193.551	1723.42	NU-DUL-1	Lymphoid
BLK	47.8661	140.499	1755.25	GA-10	Lymphoid
BLK	51.2191	88.802	1878.21	EB2	Lymphoid
BLK	53.7469	293.451	1970.9	KARPAS-422	Lymphoid
BLK	62.8132	212.154	2303.36	WSU-NHL	Lymphoid
BLK	67.0592	134.158	2459.06	U-2932	Lymphoid
BLK	73.2699	385.666	2686.81	RAMOS	Lymphoid
BLK	75.766	228.565	2778.34	CA46	Lymphoid
BLK	79.0811	298.912	2899.91	NAMALWA	Lymphoid
BLK	79.599	405.242	2918.9	HS-Sultan	Lymphoid
BLK	88.2622	338.026	3236.58	Daudi	Lymphoid
BLK	126.004	554.62	4620.57	RAJI	Lymphoid
BLNK	18.2314	99.5409	188.899	KARPAS-422	Lymphoid
BLNK	18.6784	95.0923	193.53	HS-Sultan	Lymphoid
BLNK	21.9303	91.2373	227.224	EB-3	Lymphoid
BLNK	25.7528	113.354	266.829	RAJI	Lymphoid
BLNK	32.3447	147.907	335.129	TK	Lymphoid
BLNK	38.8641	117.242	402.678	CA46	Lymphoid
BLNK	40.7011	153.843	421.712	NAMALWA	Lymphoid
BLNK	44.8589	77.775	464.792	EB2	Lymphoid
BLNK	45.653	188.012	473.019	NU-DUL-1	Lymphoid
BLNK	47.5286	160.53	492.452	WSU-NHL	Lymphoid
BLNK	48.8335	75.4678	505.973	MOLP-2	Lymphoid
BLNK	49.7502	118.005	515.471	Jiyoye	Lymphoid
BLNK	52.6956	277.37	545.989	RAMOS	Lymphoid
BLNK	57.0689	326.886	591.302	Farage	Lymphoid
BLNK	58.1817	222.824	602.832	Daudi	Lymphoid
BLNK	61.9861	181.945	642.249	GA-10	Lymphoid
BLNK	64.8577	133.35	672.002	KMS-12-BM	Lymphoid
BLNK	69.4357	157.507	719.436	NALM-6	Lymphoid
BLNK	69.8564	139.754	723.795	U-2932	Lymphoid
BLNK	107.498	347.641	1113.81	TMD8	Lymphoid
BLNK	107.937	178.492	1118.36	Pfeiffer	Lymphoid
BLNK	114.773	138.199	1189.18	CCRF-SB	Lymphoid
BLNK	144.864	351.259	1500.96	SUP-B15	Lymphoid
BMF	71.803	143.648	35.7879	U-2932	Lymphoid
BMP2	37.6537	67.0095	59.3078	OCI-AML3	Lymphoid
BMP3	15.7235	82.7625	1572.35	RAMOS	Lymphoid
BMP3	26.674	90.0926	2667.4	WSU-NHL	Lymphoid
BMP3	38.1062	144.034	3810.62	NAMALWA	Lymphoid
BMP3	43.5733	179.447	4357.33	NU-DUL-1	Lymphoid
BMP6	319.952	480.812	37.5675	MOLP-8	Lymphoid
BMP7	20.7239	86.2181	87.1417	EB-3	Lymphoid
BMP7	26.5024	77.7912	111.44	GA-10	Lymphoid
BMP7	27.5201	83.0204	115.719	CA46	Lymphoid
BMP7	43.5511	229.237	183.128	RAMOS	Lymphoid
BMP7	45.2351	74.8038	190.209	Pfeiffer	Lymphoid
BMP7	52.0923	229.29	219.043	RAJI	Lymphoid
BMP7	69.6148	266.611	292.723	Daudi	Lymphoid
BMP7	78.132	295.325	328.537	NAMALWA	Lymphoid
BMP8B	46.7608	91.2844	41.1802	L-363	Lymphoid
BMP8B	49.005	78.4117	43.1566	KMS-21BM	Lymphoid
BMP8B	71.3708	154.699	62.8532	AMO-1	Lymphoid
BMP8B	112.539	137.549	99.1081	THP-1	Lymphoid
BPI	62.0055	173.771	6200.55	HL-60	Lymphoid
BPI	89.1337	139.85	8913.37	OCI-AML5	Lymphoid
BPIFA1	36.9062	67.4346	3690.62	SCC-3	Lymphoid
BST1	27.9853	79.6835	112.577	PL-21	Lymphoid
BST1	82.7931	101.193	333.054	THP-1	Lymphoid
BTBD11	21.5805	66.6063	93.1981	SR-786	Lymphoid
BTG2	191.816	383.746	32.6967	U-2932	Lymphoid
BTG2	276.557	442.512	47.1415	KMS-21BM	Lymphoid
BTG2	276.864	364.899	47.1939	LP-1	Lymphoid
BTG2	281.215	517.015	47.9354	KMS-26	Lymphoid
BTG2	299.548	462.925	51.0605	MOLP-2	Lymphoid
BTK	26.2811	74.831	778.461	PL-21	Lymphoid
BTK	34.6661	69.3526	1026.83	U-2932	Lymphoid
BTK	49.7723	85.4423	1474.28	KG-1	Lymphoid
BTK	50.4393	141.356	1494.04	HL-60	Lymphoid
BTK	51.2073	88.7817	1516.79	EB2	Lymphoid
BTK	51.2511	225.587	1518.08	RAJI	Lymphoid
BTK	51.6114	295.625	1528.76	Farage	Lymphoid
BTK	53.723	100.081	1591.3	SIG-M5	Lymphoid
BTK	54.6093	97.1841	1617.56	OCI-AML3	Lymphoid
BTK	56.6014	191.174	1676.56	WSU-NHL	Lymphoid
BTK	60.1204	316.451	1780.8	RAMOS	Lymphoid
BTK	62.0952	258.337	1839.29	EB-3	Lymphoid
BTK	62.1344	234.857	1840.45	NAMALWA	Lymphoid
BTK	62.177	151.626	1841.71	HNT-34	Lymphoid
BTK	63.3463	86.7508	1876.35	KARPAS-620	Lymphoid
BTK	64.581	109.598	1912.92	Kasumi-1	Lymphoid
BTK	64.7355	133.099	1917.5	KMS-12-BM	Lymphoid
BTK	66.5444	80.1269	1971.08	CCRF-SB	Lymphoid
BTK	68.6966	114.661	2034.83	MV-4-11	Lymphoid
BTK	68.7236	349.875	2035.63	HS-Sultan	Lymphoid
BTK	70.9408	172.013	2101.31	SUP-B15	Lymphoid
BTK	73.9577	338.197	2190.67	TK	Lymphoid
BTK	75.5035	135.234	2236.46	U-937	Lymphoid
BTK	75.9975	172.392	2251.09	NALM-6	Lymphoid
BTK	77.5528	134.276	2297.15	OCI-M1	Lymphoid
BTK	79.2686	326.451	2347.98	NU-DUL-1	Lymphoid
BTK	80.7471	85.8293	2391.77	OCI-M2	Lymphoid
BTK	83.9952	458.603	2487.98	KARPAS-422	Lymphoid
BTK	84.5263	128.796	2503.72	HEL	Lymphoid
BTK	85.1953	124.931	2523.53	UKE-1	Lymphoid
BTK	86.0913	252.699	2550.07	GA-10	Lymphoid
BTK	88.466	152.683	2620.41	OCI-AML2	Lymphoid
BTK	94.1435	304.452	2788.58	TMD8	Lymphoid
BTK	102.551	121.255	3037.62	SET-2	Lymphoid
BTK	104.958	147.379	3108.91	MOLM-16	Lymphoid
BTK	105.767	319.07	3132.88	CA46	Lymphoid
BTK	108.404	415.165	3210.98	Daudi	Lymphoid
BTLA	42.5402	65.742	3337.46	MOLP-2	Lymphoid
BZRAP1	24.0763	81.3186	264.765	WSU-NHL	Lymphoid
BZRAP1	100.511	170.573	1105.31	Kasumi-1	Lymphoid
C10orf128	27.0983	64.4271	2709.83	JJN-3	Lymphoid
C10orf128	47.4277	82.9302	4742.77	K-562	Lymphoid
C10orf128	49.1513	74.8936	4915.13	HEL	Lymphoid
C10orf128	60.0863	88.111	6008.63	UKE-1	Lymphoid
C10orf128	61.1051	70.4136	6110.51	U266B1	Lymphoid
C10orf128	81.8192	141.663	8181.92	OCI-M1	Lymphoid
C10orf128	98.5914	169.248	9859.14	KG-1	Lymphoid
C10orf136	51.972	94.9627	5197.2	SCC-3	Lymphoid
C10orf91	84.9949	146.692	173.882	OCI-AML2	Lymphoid
C10orf91	94.6227	176.274	193.578	SIG-M5	Lymphoid
C11orf21	35.8195	100.384	3581.95	HL-60	Lymphoid
C11orf21	40.1864	68.9865	4018.64	KG-1	Lymphoid
C11orf21	78.4924	92.8079	7849.24	SET-2	Lymphoid
C11orf93	174.606	415.131	1191.93	JJN-3	Lymphoid
C12orf39	200.863	1096.68	1236.02	KARPAS-422	Lymphoid
C12orf77	122.443	225.113	12244.3	KMS-26	Lymphoid
C14orf101	131.268	405.146	32.8081	SR-786	Lymphoid
C14orf49	39.4423	89.4703	34.0837	NALM-6	Lymphoid
C16orf54	38.1987	65.5742	3819.87	KG-1	Lymphoid
C17orf72	12.8762	65.553	40.8912	HS-Sultan	Lymphoid
C17orf72	15.8798	83.5853	50.4299	RAMOS	Lymphoid
C18orf1	17.5776	95.9716	281.942	KARPAS-422	Lymphoid
C19orf38	26.0323	74.1224	142.651	PL-21	Lymphoid
C19orf38	52.2339	81.9543	286.229	OCI-AML5	Lymphoid
C19orf59	39.8447	70.9087	1242.82	OCI-AML3	Lymphoid
C19orf59	63.109	117.566	1968.47	SIG-M5	Lymphoid
C19orf59	95.0388	270.607	2964.41	PL-21	Lymphoid
C19orf77	24.2127	73.0428	176.472	CA46	Lymphoid
C19orf77	92.5486	135.714	674.533	UKE-1	Lymphoid
C19orf77	231.42	397.27	1686.68	KG-1	Lymphoid
C1orf127	84.9253	127.622	2383.45	MOLP-8	Lymphoid
C1orf150	74.7443	104.954	7474.43	MOLM-16	Lymphoid
C1orf150	83.9808	144.167	8398.08	KG-1	Lymphoid
C1orf150	100.705	153.448	10070.5	HEL	Lymphoid
C1orf150	111.287	271.386	11128.7	HNT-34	Lymphoid
C1orf162	38.0919	65.7427	90.8671	OCI-AML2	Lymphoid
C1orf162	42.4259	72.8309	101.206	KG-1	Lymphoid
C1orf162	52.0967	146.001	124.275	HL-60	Lymphoid
C1orf162	55.644	92.8754	132.737	MV-4-11	Lymphoid
C1orf162	78.3823	139.491	186.979	OCI-AML3	Lymphoid
C1orf162	139.927	398.417	333.791	PL-21	Lymphoid
C1orf173	109.975	126.728	10997.5	U266B1	Lymphoid
C1orf186	92.8013	141.405	9280.13	HEL	Lymphoid
C1orf186	221.877	348.122	22187.7	OCI-AML5	Lymphoid
C1orf228	40.0031	69.0412	253.735	OCI-AML2	Lymphoid
C1orf228	46.9907	131.692	298.056	HL-60	Lymphoid
C1orf228	54.1473	90.3772	343.449	MV-4-11	Lymphoid
C1orf228	62.9438	108.053	399.244	KG-1	Lymphoid
C1orf228	64.2251	182.87	407.371	PL-21	Lymphoid
C1orf228	133.169	238.518	844.673	U-937	Lymphoid
C1orf228	201.088	341.258	1275.48	Kasumi-1	Lymphoid
C1orf38	63.2366	98.4723	60.8602	EJM	Lymphoid
C1orf38	68.801	82.844	66.2155	CCRF-SB	Lymphoid
C1orf38	73.2696	173.791	70.5162	Jiyoye	Lymphoid
C1orf54	35.754	69.3171	47.2752	A4/Fuk	Lymphoid
C1orf94	20.9003	64.5069	2090.03	SR-786	Lymphoid
C1QTNF4	196.568	333.587	5830.05	Kasumi-1	Lymphoid
C2	88.0849	137.166	86.8676	EJM	Lymphoid
C2	91.6176	141.587	90.3515	MOLP-2	Lymphoid
C21orf7	51.5891	262.642	62.3675	HS-Sultan	Lymphoid
C22orf34	11.8811	64.869	666.314	KARPAS-422	Lymphoid
C2orf54	45.992	68.1792	1117.29	KMS-28PE	Lymphoid
C4A	90.1496	140.381	1043.39	EJM	Lymphoid
C4B	78.5347	122.295	1179.62	EJM	Lymphoid
C4orf34	259.644	1080.21	34.3765	EB-3	Lymphoid
C4orf34	362.015	1386.44	47.9302	Daudi	Lymphoid
C5AR1	63.7361	118.034	517.674	KMS-27	Lymphoid
C5orf20	78.4949	131.016	7849.49	MV-4-11	Lymphoid
C6orf141	43.6912	75.0031	43.0317	KG-1	Lymphoid
C6orf223	20.0989	115.125	91.8059	Farage	Lymphoid
C6orf223	20.1926	65.3013	92.234	TMD8	Lymphoid
C6orf25	79.8848	94.4542	756.292	SET-2	Lymphoid
C6orf25	84.1781	128.265	796.938	HEL	Lymphoid
C6orf25	88.0666	93.6094	833.751	OCI-M2	Lymphoid
C6orf58	97.8876	453.893	2694.62	RC-K8	Lymphoid
C6orf99	131.673	217.743	143.567	Pfeiffer	Lymphoid
C7orf58	107.777	188.455	760.9	K-562	Lymphoid
C7orf69	12.4985	68.24	1249.85	KARPAS-422	Lymphoid
C8orf12	59.7852	314.687	5978.52	RAMOS	Lymphoid
C8orf12	60.986	122.008	6098.6	U-2932	Lymphoid
C8orf80	17.008	70.759	1298.82	EB-3	Lymphoid
C8orf80	31.3562	92.0382	2394.52	GA-10	Lymphoid
C8orf80	33.4044	170.063	2550.92	HS-Sultan	Lymphoid
C8orf80	34.1093	102.898	2604.75	CA46	Lymphoid
C8orf80	50.3762	275.047	3846.98	KARPAS-422	Lymphoid
C8orf80	56.154	295.574	4288.2	RAMOS	Lymphoid
C8orf80	61.2526	234.585	4677.56	Daudi	Lymphoid
CA1	52.9373	91.6566	5287.68	OCI-M1	Lymphoid
CA1	89.3222	125.424	8922	MOLM-16	Lymphoid
CA1	189.693	289.042	18947.6	HEL	Lymphoid
CA1	394.493	466.441	39404.2	SET-2	Lymphoid
CA1	442.236	470.07	44173	OCI-M2	Lymphoid
CA1	1638.81	2305.19	163693	KU812	Lymphoid
CA12	33.6494	103.856	33.2437	SR-786	Lymphoid
CA12	42.2322	77.1661	41.7231	SCC-3	Lymphoid
CA2	37.7993	65.4465	33.3918	OCI-M1	Lymphoid
CA2	39.5944	71.4433	34.9776	KMS-28BM	Lymphoid
CA2	64.1248	110.081	56.6476	KG-1	Lymphoid
CA2	80.5956	248.751	71.1979	SR-786	Lymphoid
CA2	101.24	158.844	89.4347	OCI-AML5	Lymphoid
CA2	129.049	137.171	114.001	OCI-M2	Lymphoid
CA2	181.802	255.728	160.603	KU812	Lymphoid
CA2	296.331	527.359	261.778	OCI-AML3	Lymphoid
CA2	321.005	554.022	283.575	OCI-AML2	Lymphoid
CA2	1203.96	1471.52	1063.57	THP-1	Lymphoid
CA8	30.8606	75.257	153.288	HNT-34	Lymphoid
CA8	147.256	254.962	731.44	OCI-M1	Lymphoid
CA9	49.0276	116.291	167.037	Jiyoye	Lymphoid
CACNA2D3	33.1459	102.302	755.148	SR-786	Lymphoid
CACNA2D4	24.7641	70.5116	457.576	PL-21	Lymphoid
CACNA2D4	48.2922	80.6045	892.314	MV-4-11	Lymphoid
CACNA2D4	48.8584	84.3246	902.776	OCI-AML2	Lymphoid
CACNA2D4	56.2627	100.127	1039.59	OCI-AML3	Lymphoid
CACNA2D4	58.8159	109.569	1086.76	SIG-M5	Lymphoid
CACNG6	37.9211	74.028	730.504	L-363	Lymphoid
CADM1	111.079	172.972	36.7807	EJM	Lymphoid
CADM1	116.582	210.358	38.603	KMS-28BM	Lymphoid
CADM1	137.952	255.476	45.6791	KMS-27	Lymphoid
CADM1	172.885	199.222	57.2463	U266B1	Lymphoid
CADM1	202.41	304.173	67.0226	MOLP-8	Lymphoid
CADPS	13.4601	70.849	1346.01	RAMOS	Lymphoid
CALML4	100.414	132.343	33.8713	LP-1	Lymphoid
CALN1	27.7133	65.8892	2771.33	JJN-3	Lymphoid
CAMK4	15.0946	86.4608	36.9466	Farage	Lymphoid
CAMK4	34.8809	161.738	85.3767	RC-K8	Lymphoid
CAMK4	41.1364	171.141	100.688	EB-3	Lymphoid
CAMK4	46.0347	109.192	112.677	Jiyoye	Lymphoid
CAMK4	58.3933	96.5631	142.927	Pfeiffer	Lymphoid
CAMP	20.1106	105.855	2011.06	RAMOS	Lymphoid
CAMP	24.2252	132.267	2422.52	KARPAS-422	Lymphoid
CAMP	60.1539	142.682	6015.39	Jiyoye	Lymphoid
CARD11	17.0629	89.8128	126.965	RAMOS	Lymphoid
CARD11	19.9217	82.881	148.238	EB-3	Lymphoid
CARD11	20.5235	117.557	152.716	Farage	Lymphoid
CARD11	29.1528	120.06	216.926	NU-DUL-1	Lymphoid
CARD11	34.9399	105.404	259.988	CA46	Lymphoid
CARD11	35.3176	192.829	262.798	KARPAS-422	Lymphoid
CARD11	37.6122	142.167	279.873	NAMALWA	Lymphoid
CARD11	40.3745	118.509	300.427	GA-10	Lymphoid
CARD11	44.271	194.864	329.421	RAJI	Lymphoid
CARD11	46.9036	179.631	349.01	Daudi	Lymphoid
CARD11	48.1376	162.587	358.192	WSU-NHL	Lymphoid
CARD11	53.8181	273.99	400.461	HS-Sultan	Lymphoid
CARD11	56.3866	182.35	419.573	TMD8	Lymphoid
CARD11	65.6083	113.75	488.192	EB2	Lymphoid
CARD16	36.5746	88.684	39.6447	SUP-B15	Lymphoid
CARD9	29.3167	83.4743	56.7653	PL-21	Lymphoid
CARD9	56.8576	94.901	110.092	MV-4-11	Lymphoid
CARD9	65.3134	99.5204	126.465	HEL	Lymphoid
CARD9	65.4915	183.54	126.81	HL-60	Lymphoid
CARD9	72.768	88.9399	140.899	THP-1	Lymphoid
CASP1	31.0774	73.8876	48.614	JJN-3	Lymphoid
CASP1	50.5762	156.099	79.1156	SR-786	Lymphoid
CASP1	50.6541	122.823	79.2376	SUP-B15	Lymphoid
CASP10	39.123	84.8006	39.3523	AMO-1	Lymphoid
CBFA2T3	12.5558	71.9186	179.088	Farage	Lymphoid
CBFA2T3	17.2009	65.0162	245.342	NAMALWA	Lymphoid
CBFA2T3	24.0908	72.6752	343.615	CA46	Lymphoid
CBFA2T3	26.8815	78.904	383.42	GA-10	Lymphoid
CBFA2T3	31.765	107.288	453.075	WSU-NHL	Lymphoid
CBFA2T3	33.4824	66.9846	477.571	U-2932	Lymphoid
CBFA2T3	41.1051	67.9742	586.296	Pfeiffer	Lymphoid
CBFA2T3	56.3548	79.1318	803.807	MOLM-16	Lymphoid
CBFA2T3	61.5537	150.106	877.961	HNT-34	Lymphoid
CBFA2T3	62.4697	73.8629	891.026	SET-2	Lymphoid
CBFA2T3	103.594	157.85	1477.6	HEL	Lymphoid
CBLN2	91.3726	169.214	9137.26	KMS-27	Lymphoid
CCDC110	14.2917	75.2261	85.0391	RAMOS	Lymphoid
CCDC136	45.0374	80.6662	48.1594	U-937	Lymphoid
CCDC169-SOHLH2	39.0025	75.6151	133.462	A4/Fuk	Lymphoid
CCDC3	27.267	84.1573	394.594	SR-786	Lymphoid
CCDC3	92.8119	169.585	1343.12	SCC-3	Lymphoid
CCDC69	46.3936	191.062	32.2858	NU-DUL-1	Lymphoid
CCDC69	47.5801	107.93	33.1115	NALM-6	Lymphoid
CCDC69	49.466	159.969	34.4239	TMD8	Lymphoid
CCDC69	58.8287	97.2831	40.9395	Pfeiffer	Lymphoid
CCDC69	59.7084	175.259	41.5517	GA-10	Lymphoid
CCDC69	63.4071	239.667	44.1257	NAMALWA	Lymphoid
CCDC69	64.2685	110.593	44.7251	MM.1	Lymphoid
CCDC69	65.8956	198.789	45.8575	CA46	Lymphoid
CCDC69	70.7431	238.938	49.2309	WSU-NHL	Lymphoid
CCDC69	72.6061	157.376	50.5274	AMO-1	Lymphoid
CCDC69	74.0697	326.026	51.5459	RAJI	Lymphoid
CCDC69	74.167	377.587	51.6136	HS-Sultan	Lymphoid
CCDC69	75.4932	103.386	52.5365	KARPAS-620	Lymphoid
CCDC69	77.4781	93.2922	53.9178	CCRF-SB	Lymphoid
CCDC69	84.7506	146.938	58.9788	EB2	Lymphoid
CCDC69	109.044	624.592	75.8846	Farage	Lymphoid
CCDC69	124.728	656.521	86.7994	RAMOS	Lymphoid
CCDC69	135.644	271.368	94.3963	U-2932	Lymphoid
CCDC69	155.35	848.189	108.109	KARPAS-422	Lymphoid
CCDC69	162.994	253.814	113.429	EJM	Lymphoid
CCDC69	179.243	686.464	124.737	Daudi	Lymphoid
CCDC85A	22.6129	94.0772	397.997	EB-3	Lymphoid
CCDC85A	24.2136	123.272	426.169	HS-Sultan	Lymphoid
CCDC85A	64.0649	245.356	1127.57	Daudi	Lymphoid
CCDC88B	46.6992	71.1572	53.5701	HEL	Lymphoid
CCDC88B	48.4266	89.6821	55.5517	KMS-27	Lymphoid
CCL17	67.7512	160.702	1402.14	Jiyoye	Lymphoid
CCL17	140.151	649.865	2900.49	RC-K8	Lymphoid
CCL17	1425.97	2358.08	29511.1	Pfeiffer	Lymphoid
CCL2	99.7707	156.539	675.969	OCI-AML5	Lymphoid
CCL2	241.182	686.725	1634.06	PL-21	Lymphoid
CCL22	75.5914	131.058	7028.98	EB2	Lymphoid
CCL22	165.124	198.827	15354.3	CCRF-SB	Lymphoid
CCL22	285.816	1325.29	26577.1	RC-K8	Lymphoid
CCL22	302.78	718.177	28154.5	Jiyoye	Lymphoid
CCL3	44.7503	92.0088	4475.03	KMS-12-BM	Lymphoid
CCL3	63.9868	115.186	6398.68	KMM-1	Lymphoid
CCL3	71.6813	138.97	7168.13	A4/Fuk	Lymphoid
CCL3	74.4866	111.935	7448.66	MOLP-8	Lymphoid
CCL3	75.2351	246.615	7523.51	KHM-1B	Lymphoid
CCL3	91.6247	158.856	9162.47	EB2	Lymphoid
CCL3	114.7	272.704	11470	JJN-3	Lymphoid
CCL3	190.977	229.958	19097.7	CCRF-SB	Lymphoid
CCL3	231.957	358.469	23195.7	MOLP-2	Lymphoid
CCL3	251.666	433.066	25166.6	MM.1	Lymphoid
CCL3	259.083	354.806	25908.3	KARPAS-620	Lymphoid
CCL3	424.126	1006	42412.6	Jiyoye	Lymphoid
CCL3	528.843	1146.29	52884.3	AMO-1	Lymphoid
CCL3	843.91	972.468	84391	U266B1	Lymphoid
CCL4	39.0021	92.7287	3900.21	JJN-3	Lymphoid
CCL4	49.7107	86.1868	4971.07	EB2	Lymphoid
CCL4	58.1201	69.9831	5812.01	CCRF-SB	Lymphoid
CCL5	19.9795	65.4911	128.505	KHM-1B	Lymphoid
CCL5	43.9347	125.097	282.582	PL-21	Lymphoid
CCL5	44.1272	73.6527	283.821	MV-4-11	Lymphoid
CCL5	56.3999	101.017	362.757	U-937	Lymphoid
CCL5	78.5882	123.304	505.469	OCI-AML5	Lymphoid
CCL5	82.6707	179.192	531.727	AMO-1	Lymphoid
CCL5	97.5039	173.52	627.133	OCI-AML3	Lymphoid
CCL5	165.533	285.693	1064.69	OCI-AML2	Lymphoid
CCNA1	46.5146	86.6525	708.593	SIG-M5	Lymphoid
CCNA1	47.5356	85.1407	724.148	U-937	Lymphoid
CCNA1	47.9024	147.847	729.736	SR-786	Lymphoid
CCND2	40.7403	133.543	875.124	KHM-1B	Lymphoid
CCND2	41.0784	79.6396	882.387	A4/Fuk	Lymphoid
CCND2	46.3394	79.5492	995.397	KG-1	Lymphoid
CCND2	46.7626	73.3699	1004.49	OCI-AML5	Lymphoid
CCND2	64.0975	77.1806	1376.85	CCRF-SB	Lymphoid
CCND2	65.711	113.773	1411.51	OCI-M1	Lymphoid
CCND2	65.9516	100.493	1416.68	HEL	Lymphoid
CCND2	66.0112	121.362	1417.96	KMS-26	Lymphoid
CCND2	75.4406	129.408	1620.51	KMS-34	Lymphoid
CCND2	75.678	136.231	1625.61	KMM-1	Lymphoid
CCND2	76.0065	134.892	1632.66	KMS-11	Lymphoid
CCND2	76.2813	186.021	1638.57	HNT-34	Lymphoid
CCND2	85.7254	277.229	1841.43	TMD8	Lymphoid
CCND2	86.0169	132.931	1847.69	MOLP-2	Lymphoid
CCND2	97.6092	211.571	2096.7	AMO-1	Lymphoid
CCND2	102.454	243.587	2200.77	JJN-3	Lymphoid
CCND2	106.319	207.551	2283.78	L-363	Lymphoid
CCND2	110.305	175.81	2369.41	RPMI 8226	Lymphoid
CCND2	120.566	207.469	2589.82	MM.1	Lymphoid
CCND2	129.763	297.624	2787.38	OPM-2	Lymphoid
CCND2	150.78	198.723	3238.83	LP-1	Lymphoid
CCND2	173.322	411.109	3723.05	Jiyoye	Lymphoid
CCNI2	55.133	91.1716	259.831	Pfeiffer	Lymphoid
CCR1	55.2756	92.2605	1797.09	MV-4-11	Lymphoid
CCR1	60.7059	111.608	1973.63	KMS-26	Lymphoid
CCR1	64.1363	102.224	2085.16	RPMI 8226	Lymphoid
CCR1	76.4411	136.036	2485.2	OCI-AML3	Lymphoid
CCR1	80.0038	190.212	2601.04	JJN-3	Lymphoid
CCR1	87.5366	200.774	2845.94	OPM-2	Lymphoid
CCR1	101.624	174.874	3303.93	MM.1	Lymphoid
CCR1	105.028	191.907	3414.62	SCC-3	Lymphoid
CCR10	21.593	70.7802	66.8556	KHM-1B	Lymphoid
CCR10	42.5702	83.1037	131.805	L-363	Lymphoid
CCR10	57.5082	106.5	178.055	KMS-27	Lymphoid
CCR10	67.3843	159.832	208.633	Jiyoye	Lymphoid
CCR10	77.6036	102.279	240.274	LP-1	Lymphoid
CCR10	85.1959	136.32	263.781	KMS-21BM	Lymphoid
CCR2	40.5957	67.7583	4059.57	MV-4-11	Lymphoid
CCR2	64.8475	79.2592	6484.75	THP-1	Lymphoid
CCR7	42.5212	137.51	728.895	TMD8	Lymphoid
CCR7	142.491	660.712	2442.57	RC-K8	Lymphoid
CCR7	146.974	646.922	2519.42	RAJI	Lymphoid
CCR7	151.789	263.166	2601.95	EB2	Lymphoid
CCR7	191.839	230.995	3288.49	CCRF-SB	Lymphoid
CCR7	615.39	1459.67	10549	Jiyoye	Lymphoid
CD163	193.582	353.711	19358.2	SCC-3	Lymphoid
CD180	21.4444	81.0559	2144.44	NAMALWA	Lymphoid
CD180	22.7671	100.212	2276.71	RAJI	Lymphoid
CD180	25.0127	131.657	2501.27	RAMOS	Lymphoid
CD180	29.2845	85.9574	2928.45	GA-10	Lymphoid
CD180	35.4447	203.024	3544.47	Farage	Lymphoid
CD180	39.9779	135.027	3997.79	WSU-NHL	Lymphoid
CD180	51.3954	261.656	5139.54	HS-Sultan	Lymphoid
CD180	52.4757	286.511	5247.57	KARPAS-422	Lymphoid
CD180	56.5432	94.3762	5654.32	MV-4-11	Lymphoid
CD180	58.0399	222.281	5803.99	Daudi	Lymphoid
CD180	62.5953	108.526	6259.53	EB2	Lymphoid
CD180	99.7547	322.599	9975.47	TMD8	Lymphoid
CD180	125.798	195.893	12579.8	EJM	Lymphoid
CD19	29.0816	134.847	649.156	RC-K8	Lymphoid
CD19	38.8424	146.817	867.037	NAMALWA	Lymphoid
CD19	40.9847	208.655	914.857	HS-Sultan	Lymphoid
CD19	42.5115	187.119	948.938	RAJI	Lymphoid
CD19	49.0811	148.064	1095.59	CA46	Lymphoid
CD19	49.8152	168.253	1111.97	WSU-NHL	Lymphoid
CD19	61.7005	102.032	1377.27	Pfeiffer	Lymphoid
CD19	69.1337	363.894	1543.2	RAMOS	Lymphoid
CD19	70.4744	269.903	1573.12	Daudi	Lymphoid
CD19	73.232	419.466	1634.68	Farage	Lymphoid
CD19	75.8492	222.636	1693.1	GA-10	Lymphoid
CD19	97.4742	236.35	2175.81	SUP-B15	Lymphoid
CD19	97.7309	533.598	2181.54	KARPAS-422	Lymphoid
CD19	101.354	229.911	2262.43	NALM-6	Lymphoid
CD19	128.389	528.742	2865.88	NU-DUL-1	Lymphoid
CD19	144.831	251.103	3232.9	EB2	Lymphoid
CD19	188.607	227.103	4210.06	CCRF-SB	Lymphoid
CD1A	61.2418	89.4461	6124.18	Jurkat, Clone E6-1	Lymphoid
CD1C	14.0878	76.9174	1408.78	KARPAS-422	Lymphoid
CD1E	257.893	376.663	25789.3	Jurkat, Clone E6-1	Lymphoid
CD2	73.6841	107.619	7368.41	Jurkat, Clone E6-1	Lymphoid
CD22	17.8995	67.6569	95.8919	NAMALWA	Lymphoid
CD22	44.9429	106.602	240.77	Jiyoye	Lymphoid
CD22	51.35	213.633	275.094	EB-3	Lymphoid
CD22	58.4945	141.834	313.368	SUP-B15	Lymphoid
CD22	60.3835	329.686	323.488	KARPAS-422	Lymphoid
CD22	64.7812	88.7157	347.048	KARPAS-620	Lymphoid
CD22	78.3977	345.076	419.995	RAJI	Lymphoid
CD22	79.6181	159.283	426.533	U-2932	Lymphoid
CD22	82.9006	143.73	444.118	EB2	Lymphoid
CD22	85.912	277.832	460.25	TMD8	Lymphoid
CD22	138.858	407.582	743.892	GA-10	Lymphoid
CD22	153.937	464.385	824.677	CA46	Lymphoid
CD22	172.65	583.132	924.925	WSU-NHL	Lymphoid
CD22	177.945	936.636	953.292	RAMOS	Lymphoid
CD22	184.195	937.746	986.777	HS-Sultan	Lymphoid
CD22	222.803	1276.2	1193.61	Farage	Lymphoid
CD22	223.82	269.504	1199.05	CCRF-SB	Lymphoid
CD22	292.817	1121.43	1568.69	Daudi	Lymphoid
CD226	21.2709	65.6508	403.901	SR-786	Lymphoid
CD226	33.8435	193.853	642.635	Farage	Lymphoid
CD244	43.5616	74.7806	4356.16	KG-1	Lymphoid
CD244	44.4149	108.311	4441.49	HNT-34	Lymphoid
CD244	57.3677	87.4132	5736.77	HEL	Lymphoid
CD247	43.9387	239.899	911.961	KARPAS-422	Lymphoid
CD247	60.4755	143.783	1255.19	JJN-3	Lymphoid
CD247	66.0295	109.191	1370.46	Pfeiffer	Lymphoid
CD247	70.9713	232.639	1473.03	KHM-1B	Lymphoid
CD247	72.7485	224.532	1509.92	SR-786	Lymphoid
CD247	91.2278	133.242	1893.46	Jurkat, Clone E6-1	Lymphoid
CD27	99.8384	205.273	32.0593	KMS-12-BM	Lymphoid
CD27	116.221	179.609	37.3199	MOLP-2	Lymphoid
CD27	118.576	142.778	38.0761	CCRF-SB	Lymphoid
CD27	121.099	463.785	38.8863	Daudi	Lymphoid
CD27	131.028	689.682	42.0746	RAMOS	Lymphoid
CD27	160.629	265.626	51.5798	Pfeiffer	Lymphoid
CD27	171.902	407.741	55.1997	Jiyoye	Lymphoid
CD27	262.186	1154.04	84.1911	RAJI	Lymphoid
CD274	47.54	146.728	88.6133	SR-786	Lymphoid
CD28	37.678	86.4185	3767.8	OPM-2	Lymphoid
CD28	56.2322	121.885	5623.22	AMO-1	Lymphoid
CD28	57.2054	98.439	5720.54	MM.1	Lymphoid
CD28	67.6434	107.814	6764.34	RPMI 8226	Lymphoid
CD28	68.1453	133.03	6814.53	L-363	Lymphoid
CD28	71.7785	129.212	7177.85	KMM-1	Lymphoid
CD28	82.5251	128.508	8252.51	EJM	Lymphoid
CD28	154.566	178.112	15456.6	U266B1	Lymphoid
CD300A	39.3153	67.4911	3931.53	KG-1	Lymphoid
CD300A	45.8143	130.449	4581.43	PL-21	Lymphoid
CD300A	46.7524	74.8074	4675.24	KMS-21BM	Lymphoid
CD300A	59.6898	145.56	5968.98	HNT-34	Lymphoid
CD300A	62.9891	115.093	6298.91	SCC-3	Lymphoid
CD300A	73.1062	88.0279	7310.62	CCRF-SB	Lymphoid
CD300A	76.1372	119.458	7613.72	OCI-AML5	Lymphoid
CD300A	93.3235	136.85	9332.35	UKE-1	Lymphoid
CD300C	28.7748	88.8109	1337.89	SR-786	Lymphoid
CD300C	56.9553	104.068	2648.14	SCC-3	Lymphoid
CD300LF	38.6415	108.293	3864.15	HL-60	Lymphoid
CD300LF	42.4599	66.6191	4245.99	OCI-AML5	Lymphoid
CD300LF	48.3976	137.804	4839.76	PL-21	Lymphoid
CD33	36.7878	65.4685	1485.87	OCI-AML3	Lymphoid
CD33	37.8094	65.2552	1527.14	OCI-AML2	Lymphoid
CD33	38.3625	109.231	1549.47	PL-21	Lymphoid
CD33	39.977	74.4736	1614.68	SIG-M5	Lymphoid
CD33	40.1369	71.8889	1621.14	U-937	Lymphoid
CD33	54.685	153.255	2208.75	HL-60	Lymphoid
CD33	62.7296	108.611	2533.67	OCI-M1	Lymphoid
CD33	64.3615	78.6651	2599.58	THP-1	Lymphoid
CD33	85.1142	142.064	3437.8	MV-4-11	Lymphoid
CD33	94.0508	143.309	3798.75	HEL	Lymphoid
CD33	95.4986	149.836	3857.22	OCI-AML5	Lymphoid
CD34	53.1323	90.1686	2547.61	Kasumi-1	Lymphoid
CD34	166.144	405.161	7966.34	HNT-34	Lymphoid
CD34	242.722	588.538	11638.1	SUP-B15	Lymphoid
CD34	445.708	765.13	21371	KG-1	Lymphoid
CD34	506.494	742.727	24285.6	UKE-1	Lymphoid
CD36	51.8831	167.786	1835.41	TMD8	Lymphoid
CD36	61.4959	65.3665	2175.47	OCI-M2	Lymphoid
CD36	80.3319	112.997	2841.81	KU812	Lymphoid
CD36	92.4952	109.364	3272.1	SET-2	Lymphoid
CD36	121.078	170.014	4283.23	MOLM-16	Lymphoid
CD37	42.6814	73.8994	46.45	OCI-M1	Lymphoid
CD37	52.029	82.9267	56.623	RPMI 8226	Lymphoid
CD37	63.2644	98.5156	68.8504	EJM	Lymphoid
CD37	73.5409	174.435	80.0343	Jiyoye	Lymphoid
CD37	74.3101	138.433	80.8714	SIG-M5	Lymphoid
CD37	78.2326	125.178	85.1402	KMS-21BM	Lymphoid
CD37	78.415	191.224	85.3388	HNT-34	Lymphoid
CD37	87.1083	155.02	94.7997	OCI-AML3	Lymphoid
CD37	100.779	153.561	109.677	HEL	Lymphoid
CD37	101.405	580.837	110.358	Farage	Lymphoid
CD37	106.167	401.292	115.541	NAMALWA	Lymphoid
CD37	106.595	494.268	116.007	RC-K8	Lymphoid
CD37	108.309	446.047	117.872	NU-DUL-1	Lymphoid
CD37	110.755	173.773	120.534	OCI-AML5	Lymphoid
CD37	112.091	173.227	121.989	MOLP-2	Lymphoid
CD37	121.306	217.271	132.017	U-937	Lymphoid
CD37	122.664	245.4	133.494	U-2932	Lymphoid
CD37	131.438	180	143.044	KARPAS-620	Lymphoid
CD37	138.287	284.325	150.498	KMS-12-BM	Lymphoid
CD37	140.38	234.308	152.775	MV-4-11	Lymphoid
CD37	147.849	615.099	160.903	EB-3	Lymphoid
CD37	150.638	766.904	163.939	HS-Sultan	Lymphoid
CD37	156.708	188.694	170.545	CCRF-SB	Lymphoid
CD37	161.872	852.033	176.165	RAMOS	Lymphoid
CD37	180.225	608.717	196.138	WSU-NHL	Lymphoid
CD37	202.45	343.57	220.326	Kasumi-1	Lymphoid
CD37	210.996	619.327	229.627	GA-10	Lymphoid
CD37	213.002	312.348	231.809	UKE-1	Lymphoid
CD37	218.203	266.696	237.47	THP-1	Lymphoid
CD37	219.539	662.287	238.923	CA46	Lymphoid
CD37	220.917	381.279	240.423	OCI-AML2	Lymphoid
CD37	221.621	366.488	241.19	Pfeiffer	Lymphoid
CD37	231.316	397.091	251.74	KG-1	Lymphoid
CD37	232.148	402.49	252.645	EB2	Lymphoid
CD37	297.144	1307.91	323.381	RAJI	Lymphoid
CD37	335.75	1285.85	365.396	Daudi	Lymphoid
CD37	668.725	3651.15	727.771	KARPAS-422	Lymphoid
CD37	791.712	2560.33	861.618	TMD8	Lymphoid
CD38	19.6158	112.358	513.39	Farage	Lymphoid
CD38	23.8234	104.861	623.511	RAJI	Lymphoid
CD38	33.1335	80.3404	867.178	SUP-B15	Lymphoid
CD38	33.4105	75.7879	874.427	NALM-6	Lymphoid
CD38	45.0464	147.659	1178.97	KHM-1B	Lymphoid
CD38	53.4062	106.844	1397.76	U-2932	Lymphoid
CD38	54.3077	205.273	1421.35	NAMALWA	Lymphoid
CD38	55.5345	163.007	1453.46	GA-10	Lymphoid
CD38	61.1163	80.5497	1599.55	LP-1	Lymphoid
CD38	64.3158	111.509	1683.29	EB2	Lymphoid
CD38	68.3324	359.676	1788.41	RAMOS	Lymphoid
CD38	69.7621	355.162	1825.83	HS-Sultan	Lymphoid
CD38	75.808	130.137	1984.06	KG-1	Lymphoid
CD38	87.9633	135.939	2302.19	MOLP-2	Lymphoid
CD38	98.1941	296.224	2569.96	CA46	Lymphoid
CD38	99.8081	147.957	2612.2	KMS-28PE	Lymphoid
CD38	108.295	445.99	2834.32	NU-DUL-1	Lymphoid
CD38	158.018	306.353	4135.68	A4/Fuk	Lymphoid
CD38	197.377	755.916	5165.8	Daudi	Lymphoid
CD38	206.144	309.785	5395.26	MOLP-8	Lymphoid
CD3D	88.7115	273.8	8871.15	SR-786	Lymphoid
CD3D	89.3471	131.019	8934.71	UKE-1	Lymphoid
CD3D	404.465	590.737	40446.5	Jurkat, Clone E6-1	Lymphoid
CD3E	59.4952	92.6461	5949.52	EJM	Lymphoid
CD3E	62.9142	86.1589	6291.42	KARPAS-620	Lymphoid
CD3E	345.372	504.429	34537.2	Jurkat, Clone E6-1	Lymphoid
CD3G	80.4943	439.489	7354.1	KARPAS-422	Lymphoid
CD3G	93.3504	136.342	8528.66	Jurkat, Clone E6-1	Lymphoid
CD4	26.6021	64.8721	468.359	HNT-34	Lymphoid
CD4	29.1253	82.9293	512.783	PL-21	Lymphoid
CD4	45.6333	81.7334	803.424	U-937	Lymphoid
CD4	54.0147	93.2238	950.989	OCI-AML2	Lymphoid
CD4	61.9521	173.621	1090.74	HL-60	Lymphoid
CD4	63.2877	112.628	1114.25	OCI-AML3	Lymphoid
CD4	85.2797	142.34	1501.44	MV-4-11	Lymphoid
CD4	85.7405	104.795	1509.56	THP-1	Lymphoid
CD4	149.012	223.929	2623.52	MOLP-8	Lymphoid
CD4	177.976	385.77	3133.47	AMO-1	Lymphoid
CD4	224.737	435.704	3956.75	A4/Fuk	Lymphoid
CD40	37.9723	128.253	39.1461	WSU-NHL	Lymphoid
CD40	45.0218	172.424	46.4135	Daudi	Lymphoid
CD40	45.9944	148.742	47.4162	TMD8	Lymphoid
CD40	60.5031	121.042	62.3733	U-2932	Lymphoid
CD40	78.8479	136.704	81.2853	EB2	Lymphoid
CD40	83.2831	366.579	85.8575	RAJI	Lymphoid
CD40	92.2959	111.134	95.1489	CCRF-SB	Lymphoid
CD40	93.6453	154.858	96.54	Pfeiffer	Lymphoid
CD40	97.4985	558.463	100.512	Farage	Lymphoid
CD40	119.568	283.608	123.264	Jiyoye	Lymphoid
CD40	289.931	1344.37	298.894	RC-K8	Lymphoid
CD48	20.1107	91.9633	2011.07	TK	Lymphoid
CD48	24.3485	82.2381	2434.85	WSU-NHL	Lymphoid
CD48	34.4715	83.5846	3447.15	SUP-B15	Lymphoid
CD48	36.7913	67.641	3679.13	KMS-26	Lymphoid
CD48	47.9392	136.499	4793.92	PL-21	Lymphoid
CD48	50.815	66.9728	5081.5	LP-1	Lymphoid
CD48	55.3882	209.357	5538.82	NAMALWA	Lymphoid
CD48	56.5841	288.072	5658.41	HS-Sultan	Lymphoid
CD48	57.1445	172.389	5714.45	CA46	Lymphoid
CD48	59.3931	141.209	5939.31	JJN-3	Lymphoid
CD48	61.4539	92.3505	6145.39	MOLP-8	Lymphoid
CD48	62.9759	203.659	6297.59	TMD8	Lymphoid
CD48	64.7983	100.904	6479.83	EJM	Lymphoid
CD48	68.8135	102.01	6881.35	KMS-28PE	Lymphoid
CD48	70.4238	206.712	7042.38	GA-10	Lymphoid
CD48	74.5769	127.926	7457.69	KMS-34	Lymphoid
CD48	77.3798	407.299	7737.98	RAMOS	Lymphoid
CD48	87.133	358.839	8713.3	NU-DUL-1	Lymphoid
CD48	92.217	383.653	9221.7	EB-3	Lymphoid
CD48	96.3588	551.935	9635.88	Farage	Lymphoid
CD48	96.5334	166.115	9653.34	MM.1	Lymphoid
CD48	101.626	157.054	10162.6	MOLP-2	Lymphoid
CD48	103.404	119.156	10340.4	U266B1	Lymphoid
CD48	111.688	223.442	11168.8	U-2932	Lymphoid
CD48	121.117	463.853	12111.7	Daudi	Lymphoid
CD48	124.51	224.136	12451	KMM-1	Lymphoid
CD48	134.415	184.077	13441.5	KARPAS-620	Lymphoid
CD48	134.522	319.078	13452.2	Jiyoye	Lymphoid
CD48	138.557	217.394	13855.7	OCI-AML5	Lymphoid
CD48	140.04	224.074	14004	KMS-21BM	Lymphoid
CD48	148.419	287.743	14841.9	A4/Fuk	Lymphoid
CD48	153.855	352.882	15385.5	OPM-2	Lymphoid
CD48	177.93	308.489	17793	EB2	Lymphoid
CD48	180.762	334.755	18076.2	KMS-27	Lymphoid
CD48	195.647	235.581	19564.7	CCRF-SB	Lymphoid
CD48	230.081	449.155	23008.1	L-363	Lymphoid
CD48	275.114	496.409	27511.4	KMS-28BM	Lymphoid
CD48	281.919	1240.9	28191.9	RAJI	Lymphoid
CD48	370.402	1214.15	37040.2	KHM-1B	Lymphoid
CD48	459.048	995.003	45904.8	AMO-1	Lymphoid
CD52	39.5562	68.0684	417.91	MM.1	Lymphoid
CD52	72.0315	125.951	761.011	K-562	Lymphoid
CD52	73.8702	210.333	780.436	PL-21	Lymphoid
CD52	76.1537	287.847	804.562	NAMALWA	Lymphoid
CD52	77.7157	89.5546	821.065	U266B1	Lymphoid
CD52	81.0925	273.893	856.74	WSU-NHL	Lymphoid
CD52	85.4713	170.993	903.002	U-2932	Lymphoid
CD52	85.8605	377.924	907.114	RAJI	Lymphoid
CD52	92.6931	385.634	979.3	EB-3	Lymphoid
CD52	99.5532	543.547	1051.78	KARPAS-422	Lymphoid
CD52	107.202	220.412	1132.59	KMS-12-BM	Lymphoid
CD52	113.967	270.324	1204.06	Jiyoye	Lymphoid
CD52	179.829	740.587	1899.89	NU-DUL-1	Lymphoid
CD52	182.836	700.227	1931.66	Daudi	Lymphoid
CD52	210.353	1070.91	2222.37	HS-Sultan	Lymphoid
CD52	239.249	410.709	2527.65	KG-1	Lymphoid
CD52	262.349	1502.71	2771.71	Farage	Lymphoid
CD52	323.763	535.395	3420.54	Pfeiffer	Lymphoid
CD52	326.335	565.789	3447.72	EB2	Lymphoid
CD52	372.805	448.898	3938.67	CCRF-SB	Lymphoid
CD52	373.794	1097.18	3949.12	GA-10	Lymphoid
CD52	386.871	1167.08	4087.28	CA46	Lymphoid
CD52	515.091	2711.24	5441.92	RAMOS	Lymphoid
CD52	545.513	1322.73	5763.33	SUP-B15	Lymphoid
CD52	562.413	1371.51	5941.88	HNT-34	Lymphoid
CD52	671.418	984.574	7093.51	UKE-1	Lymphoid
CD53	33.82	156.819	661.556	RC-K8	Lymphoid
CD53	47.9318	75.2044	937.6	OCI-AML5	Lymphoid
CD53	48.504	135.933	948.792	HL-60	Lymphoid
CD53	49.8223	227.83	974.581	TK	Lymphoid
CD53	59.2954	178.877	1159.88	CA46	Lymphoid
CD53	59.3573	100.733	1161.09	Kasumi-1	Lymphoid
CD53	67.1809	117.47	1314.13	K-562	Lymphoid
CD53	67.6118	116.691	1322.56	OCI-AML2	Lymphoid
CD53	68.6486	106.09	1342.84	MOLP-2	Lymphoid
CD53	69.3018	261.948	1355.62	NAMALWA	Lymphoid
CD53	76.262	317.275	1491.77	EB-3	Lymphoid
CD53	77.7439	113.548	1520.76	Jurkat, Clone E6-1	Lymphoid
CD53	79.5327	155.26	1555.75	L-363	Lymphoid
CD53	80.4624	439.314	1573.93	KARPAS-422	Lymphoid
CD53	80.7003	134.697	1578.59	MV-4-11	Lymphoid
CD53	84.8481	158.065	1659.72	SIG-M5	Lymphoid
CD53	88.0701	151.551	1722.75	MM.1	Lymphoid
CD53	89.1817	253.93	1744.49	PL-21	Lymphoid
CD53	89.5917	125.802	1752.51	MOLM-16	Lymphoid
CD53	92.8767	107.025	1816.77	U266B1	Lymphoid
CD53	93.1679	165.804	1822.47	OCI-AML3	Lymphoid
CD53	94.2084	318.193	1842.82	WSU-NHL	Lymphoid
CD53	94.5559	416.198	1849.62	RAJI	Lymphoid
CD53	98.1595	404.249	1920.11	NU-DUL-1	Lymphoid
CD53	98.524	169.133	1927.24	KG-1	Lymphoid
CD53	99.7108	172.641	1950.45	OCI-M1	Lymphoid
CD53	100.082	244.061	1957.71	HNT-34	Lymphoid
CD53	101.278	182.744	1981.11	KMS-28BM	Lymphoid
CD53	101.855	203.769	1992.39	U-2932	Lymphoid
CD53	103.959	235.819	2033.56	NALM-6	Lymphoid
CD53	120.191	192.314	2351.07	KMS-21BM	Lymphoid
CD53	120.914	188.288	2365.21	EJM	Lymphoid
CD53	121.381	294.318	2374.35	SUP-B15	Lymphoid
CD53	121.546	263.456	2377.58	AMO-1	Lymphoid
CD53	128.36	263.914	2510.86	KMS-12-BM	Lymphoid
CD53	160.107	494.157	3131.88	SR-786	Lymphoid
CD53	164.943	868.197	3226.46	RAMOS	Lymphoid
CD53	177.528	421.086	3472.64	Jiyoye	Lymphoid
CD53	201.784	592.285	3947.11	GA-10	Lymphoid
CD53	256.321	828.92	5013.92	TMD8	Lymphoid
CD53	258.923	354.587	5064.83	KARPAS-620	Lymphoid
CD53	303.121	1736.25	5929.39	Farage	Lymphoid
CD53	314.864	1602.99	6159.1	HS-Sultan	Lymphoid
CD53	321.66	1231.89	6292.02	Daudi	Lymphoid
CD53	490.412	590.511	9593	CCRF-SB	Lymphoid
CD53	573.242	993.869	11213.3	EB2	Lymphoid
CD69	37.8902	111.217	3789.02	GA-10	Lymphoid
CD69	48.3857	70.9533	4838.57	UKE-1	Lymphoid
CD69	69.3136	119.628	6931.36	OCI-AML2	Lymphoid
CD7	58.8393	85.9372	840.035	Jurkat, Clone E6-1	Lymphoid
CD7	87.5702	213.55	1250.22	HNT-34	Lymphoid
CD7	246.512	394.437	3519.39	KMS-21BM	Lymphoid
CD70	34.6947	182.62	33.462	RAMOS	Lymphoid
CD70	42.5156	160.701	41.0049	NAMALWA	Lymphoid
CD70	43.3248	65.1068	41.7855	MOLP-8	Lymphoid
CD70	45.7117	93.9855	44.0875	KMS-12-BM	Lymphoid
CD70	49.6959	96.3467	47.9302	A4/Fuk	Lymphoid
CD70	53.0044	69.8584	51.1211	LP-1	Lymphoid
CD70	56.8049	101.092	54.7866	OCI-AML3	Lymphoid
CD70	58.5149	224.1	56.4359	Daudi	Lymphoid
CD70	61.132	179.438	58.9599	GA-10	Lymphoid
CD70	61.2761	198.162	59.0989	TMD8	Lymphoid
CD70	61.3311	122.698	59.1519	U-2932	Lymphoid
CD70	66.1902	306.916	63.8384	RC-K8	Lymphoid
CD70	71.5098	155	68.969	AMO-1	Lymphoid
CD70	71.9884	120.156	69.4306	MV-4-11	Lymphoid
CD70	75.6101	384.934	72.9236	HS-Sultan	Lymphoid
CD70	81.1705	127.355	78.2864	OCI-AML5	Lymphoid
CD70	89.9184	109.902	86.7236	THP-1	Lymphoid
CD70	101.824	583.241	98.2064	Farage	Lymphoid
CD70	114.79	213.844	110.712	SIG-M5	Lymphoid
CD70	115.398	207.733	111.298	KMM-1	Lymphoid
CD70	118.122	398.96	113.925	WSU-NHL	Lymphoid
CD70	119.089	205.536	114.858	OCI-AML2	Lymphoid
CD70	127.052	203.293	122.538	KMS-21BM	Lymphoid
CD70	127.097	218.017	122.581	KMS-34	Lymphoid
CD70	179.649	216.317	173.265	CCRF-SB	Lymphoid
CD70	210.061	242.061	202.597	U266B1	Lymphoid
CD70	227.813	394.974	219.718	EB2	Lymphoid
CD70	275.191	652.738	265.414	Jiyoye	Lymphoid
CD70	500.998	2205.2	483.197	RAJI	Lymphoid
CD72	17.8689	68.4343	52.0483	Daudi	Lymphoid
CD72	19.7866	74.7897	57.6341	NAMALWA	Lymphoid
CD72	19.9106	87.6386	57.9953	RAJI	Lymphoid
CD72	23.376	123.042	68.0892	RAMOS	Lymphoid
CD72	25.2704	144.747	73.6073	Farage	Lymphoid
CD72	29.1177	87.84	84.8138	CA46	Lymphoid
CD72	30.2547	88.8052	88.1256	GA-10	Lymphoid
CD72	46.4939	105.466	135.427	NALM-6	Lymphoid
CD72	54.4895	224.404	158.716	NU-DUL-1	Lymphoid
CD72	57.0398	290.392	166.145	HS-Sultan	Lymphoid
CD72	71.0172	123.127	206.858	EB2	Lymphoid
CD72	113.745	367.842	331.314	TMD8	Lymphoid
CD74	103.589	192.977	35.581	SIG-M5	Lymphoid
CD74	107.607	194.163	36.9609	KMS-28BM	Lymphoid
CD74	114.509	139.957	39.3316	THP-1	Lymphoid
CD74	120.071	191.375	41.2421	RPMI 8226	Lymphoid
CD74	142.622	256.74	48.9879	KMM-1	Lymphoid
CD74	167.091	307.197	57.3926	KMS-26	Lymphoid
CD74	190.405	219.411	65.4007	U266B1	Lymphoid
CD74	258.084	530.632	88.6469	KMS-12-BM	Lymphoid
CD74	271.912	470.793	93.3966	OCI-M1	Lymphoid
CD74	282.611	487.757	97.0716	OCI-AML2	Lymphoid
CD74	293.768	238.328	100.904	SKM-1	Lymphoid
CD74	346.637	513.86	119.064	KMS-28PE	Lymphoid
CD74	410.51	2351.36	141.003	Farage	Lymphoid
CD74	421.499	780.581	144.777	KMS-27	Lymphoid
CD74	439.719	733.935	151.035	MV-4-11	Lymphoid
CD74	444.477	1083.91	152.67	HNT-34	Lymphoid
CD74	448.994	1867.97	154.221	EB-3	Lymphoid
CD74	489.489	768.002	168.13	OCI-AML5	Lymphoid
CD74	497.813	971.809	170.989	L-363	Lymphoid
CD74	538.665	789.903	185.021	UKE-1	Lymphoid
CD74	554.513	2095.96	190.465	NAMALWA	Lymphoid
CD74	599.829	1966.19	206.03	KHM-1B	Lymphoid
CD74	648.378	1115.73	222.706	MM.1	Lymphoid
CD74	665.826	1036.83	228.699	EJM	Lymphoid
CD74	684.809	3131.53	235.219	TK	Lymphoid
CD74	695.359	1074.62	238.843	MOLP-2	Lymphoid
CD74	738.152	1476.74	253.542	U-2932	Lymphoid
CD74	771.803	1750.75	265.1	NALM-6	Lymphoid
CD74	865.971	1486.58	297.445	KG-1	Lymphoid
CD74	885.448	2146.99	304.135	SUP-B15	Lymphoid
CD74	896.931	1591.83	308.079	KMS-11	Lymphoid
CD74	919.843	2839.01	315.949	SR-786	Lymphoid
CD74	1008.22	5306.91	346.306	RAMOS	Lymphoid
CD74	1027.37	3015.57	352.881	GA-10	Lymphoid
CD74	1065.06	3212.98	365.828	CA46	Lymphoid
CD74	1086.93	5039.97	373.341	RC-K8	Lymphoid
CD74	1094.48	1442.5	375.934	LP-1	Lymphoid
CD74	1123.71	2671.66	385.974	JJN-3	Lymphoid
CD74	1212.77	1940.52	416.563	KMS-21BM	Lymphoid
CD74	1492.72	3235.53	512.723	AMO-1	Lymphoid
CD74	1499.45	8186.79	515.033	KARPAS-422	Lymphoid
CD74	1582.11	8054.57	543.424	HS-Sultan	Lymphoid
CD74	1599.96	2191.1	549.557	KARPAS-620	Lymphoid
CD74	1661.8	6843.77	570.797	NU-DUL-1	Lymphoid
CD74	1686.64	7423.94	579.331	RAJI	Lymphoid
CD74	1864.53	7140.79	640.433	Daudi	Lymphoid
CD74	2030.4	6857.75	697.404	WSU-NHL	Lymphoid
CD74	2110.54	3659.19	724.932	EB2	Lymphoid
CD74	2328.59	7530.47	799.828	TMD8	Lymphoid
CD74	3064.78	3690.33	1052.69	CCRF-SB	Lymphoid
CD74	3546.98	8413.23	1218.32	Jiyoye	Lymphoid
CD74	4277.88	7074.18	1469.37	Pfeiffer	Lymphoid
CD79A	27.0151	65.8793	172.787	HNT-34	Lymphoid
CD79A	34.7143	160.966	222.03	RC-K8	Lymphoid
CD79A	54.1549	247.642	346.371	TK	Lymphoid
CD79A	56.4924	116.151	361.322	KMS-12-BM	Lymphoid
CD79A	65.9855	274.522	422.039	EB-3	Lymphoid
CD79A	78.257	185.621	500.527	Jiyoye	Lymphoid
CD79A	124.596	282.631	796.905	NALM-6	Lymphoid
CD79A	177.999	672.805	1138.47	NAMALWA	Lymphoid
CD79A	255.406	619.295	1633.56	SUP-B15	Lymphoid
CD79A	275.842	832.138	1764.27	CA46	Lymphoid
CD79A	281.277	1158.38	1799.03	NU-DUL-1	Lymphoid
CD79A	314.623	923.498	2012.31	GA-10	Lymphoid
CD79A	413.873	2259.69	2647.1	KARPAS-422	Lymphoid
CD79A	428.033	856.317	2737.67	U-2932	Lymphoid
CD79A	444.251	1955.42	2841.4	RAJI	Lymphoid
CD79A	444.875	1703.78	2845.39	Daudi	Lymphoid
CD79A	448.674	1515.41	2869.69	WSU-NHL	Lymphoid
CD79A	468.952	2686.11	2999.38	Farage	Lymphoid
CD79A	468.996	813.131	2999.67	EB2	Lymphoid
CD79A	485.731	1570.81	3106.7	TMD8	Lymphoid
CD79A	495.338	2607.27	3168.15	RAMOS	Lymphoid
CD79A	508.386	612.153	3251.6	CCRF-SB	Lymphoid
CD79A	614.096	3126.39	3927.72	HS-Sultan	Lymphoid
CD79A	1040.09	1424.38	6652.37	KARPAS-620	Lymphoid
CD79B	17.5109	81.1959	428.41	RC-K8	Lymphoid
CD79B	45.8202	68.8568	1121.01	MOLP-8	Lymphoid
CD79B	46.5756	110.475	1139.49	Jiyoye	Lymphoid
CD79B	50.5848	78.7709	1237.57	EJM	Lymphoid
CD79B	51.7159	112.096	1265.25	AMO-1	Lymphoid
CD79B	54.4189	87.0743	1331.38	KMS-21BM	Lymphoid
CD79B	76.8373	118.745	1879.85	MOLP-2	Lymphoid
CD79B	91.4487	523.81	2237.32	Farage	Lymphoid
CD79B	133.348	160.566	3262.4	CCRF-SB	Lymphoid
CD79B	136.876	331.89	3348.72	SUP-B15	Lymphoid
CD79B	170.989	234.164	4183.31	KARPAS-620	Lymphoid
CD79B	249.464	432.513	6103.22	EB2	Lymphoid
CD79B	256.752	513.656	6281.53	U-2932	Lymphoid
CD79B	262.765	1093.19	6428.63	EB-3	Lymphoid
CD79B	293.155	664.99	7172.14	NALM-6	Lymphoid
CD79B	346.025	1015.67	8465.61	GA-10	Lymphoid
CD79B	369.335	2016.52	9035.9	KARPAS-422	Lymphoid
CD79B	373.454	1901.27	9136.68	HS-Sultan	Lymphoid
CD79B	388.457	1776.36	9503.73	TK	Lymphoid
CD79B	393.324	1271.98	9622.8	TMD8	Lymphoid
CD79B	435.337	1470.37	10650.7	WSU-NHL	Lymphoid
CD79B	493.215	2596.1	12066.7	RAMOS	Lymphoid
CD79B	540.364	2069.49	13220.2	Daudi	Lymphoid
CD79B	577.402	2377.91	14126.3	NU-DUL-1	Lymphoid
CD79B	604.245	2283.94	14783.1	NAMALWA	Lymphoid
CD79B	776.128	2341.36	18988.2	CA46	Lymphoid
CD79B	841.516	3704.02	20588	RAJI	Lymphoid
CD79B	1000.42	1654.35	24475.5	Pfeiffer	Lymphoid
CD80	14.1445	81.0182	1414.45	Farage	Lymphoid
CD80	16.1144	70.9295	1611.44	RAJI	Lymphoid
CD80	19.4543	90.2069	1945.43	RC-K8	Lymphoid
CD80	31.6287	75.0214	3162.87	Jiyoye	Lymphoid
CD83	169.82	339.741	50.6932	U-2932	Lymphoid
CD83	218.915	1015.08	65.3487	RC-K8	Lymphoid
CD83	265.7	439.379	79.3144	Pfeiffer	Lymphoid
CD86	12.6883	64.5967	1268.83	HS-Sultan	Lymphoid
CD86	20.8198	86.6172	2081.98	EB-3	Lymphoid
CD86	23.668	90.6438	2366.8	Daudi	Lymphoid
CD86	26.2669	150.455	2626.69	Farage	Lymphoid
CD86	30.568	103.245	3056.8	WSU-NHL	Lymphoid
CD86	30.9341	73.3739	3093.41	Jiyoye	Lymphoid
CD86	36.1136	116.789	3611.36	TMD8	Lymphoid
CD86	48.7676	80.6453	4876.76	Pfeiffer	Lymphoid
CD8A	191.282	316.317	4298.65	Pfeiffer	Lymphoid
CD8B	165.678	264.067	16567.8	RPMI 8226	Lymphoid
CD93	24.1145	74.4273	2411.45	SR-786	Lymphoid
CD93	43.4432	105.941	4344.32	HNT-34	Lymphoid
CD93	65.4964	96.0446	6549.64	UKE-1	Lymphoid
CD93	68.7931	128.155	6879.31	SIG-M5	Lymphoid
CD93	155.514	278.54	15551.4	U-937	Lymphoid
CD96	45.2825	77.7348	1642.79	KG-1	Lymphoid
CDA	39.6948	71.0971	34.8106	U-937	Lymphoid
CDA	49.6907	90.7943	43.5765	SCC-3	Lymphoid
CDA	54.5448	112.147	47.8333	KMS-12-BM	Lymphoid
CDA	93.1386	265.197	81.6784	PL-21	Lymphoid
CDH17	35.2504	146.654	1479.76	EB-3	Lymphoid
CDH2	177.638	355.381	55.689	U-2932	Lymphoid
CDH5	29.8415	72.7719	2108.54	HNT-34	Lymphoid
CDH5	87.4437	128.228	6178.6	UKE-1	Lymphoid
CDK5R1	61.162	197.793	33.9666	TMD8	Lymphoid
CEBPA	45.869	71.9678	37.0531	OCI-AML5	Lymphoid
CEBPA	56.1415	96.376	45.3512	KG-1	Lymphoid
CEBPA	59.3838	110.627	47.9704	SIG-M5	Lymphoid
CEBPA	69.2486	119.516	55.9392	OCI-AML2	Lymphoid
CEBPA	69.5957	169.717	56.2196	HNT-34	Lymphoid
CEBPA	88.702	148.053	71.6537	MV-4-11	Lymphoid
CEBPA	118.668	212.546	95.8606	U-937	Lymphoid
CEBPA	119.897	97.2695	96.8528	SKM-1	Lymphoid
CEBPA	183.101	513.141	147.909	HL-60	Lymphoid
CEBPA	202.962	248.068	163.953	THP-1	Lymphoid
CEBPA	206.929	368.257	167.158	OCI-AML3	Lymphoid
CEBPA	244.966	697.499	197.884	PL-21	Lymphoid
CEBPE	30.5718	87.048	3057.18	PL-21	Lymphoid
CEBPE	41.7526	70.8566	4175.26	Kasumi-1	Lymphoid
CEBPE	46.6955	86.9895	4669.55	SIG-M5	Lymphoid
CEBPE	160.287	449.206	16028.7	HL-60	Lymphoid
CEBPE	171.805	313.921	17180.5	SCC-3	Lymphoid
CECR1	39.8407	67.612	1288.34	Kasumi-1	Lymphoid
CECR1	41.3603	64.8939	1337.48	OCI-AML5	Lymphoid
CECR1	41.9496	77.6872	1356.54	KMS-27	Lymphoid
CECR1	46.069	131.174	1489.75	PL-21	Lymphoid
CECR1	51.4071	79.4451	1662.37	MOLP-2	Lymphoid
CECR1	62.7127	97.6564	2027.96	EJM	Lymphoid
CECR6	53.8426	95.8196	617.804	OCI-AML3	Lymphoid
CELF2	14.0612	71.5863	73.8574	HS-Sultan	Lymphoid
CELF2	19.7099	81.171	103.527	NU-DUL-1	Lymphoid
CELF2	21.455	66.2191	112.694	SR-786	Lymphoid
CELF2	23.2591	75.218	122.17	TMD8	Lymphoid
CELF2	34.9194	64.1995	183.416	KMS-26	Lymphoid
CELF2	35.5768	86.758	186.869	HNT-34	Lymphoid
CELF2	37.9305	91.9719	199.232	SUP-B15	Lymphoid
CELF2	38.877	89.1684	204.204	OPM-2	Lymphoid
CELF2	39.0933	66.3435	205.34	Kasumi-1	Lymphoid
CELF2	43.3023	74.9744	227.448	OCI-M1	Lymphoid
CELF2	47.3285	66.4573	248.596	MOLM-16	Lymphoid
CELF2	57.1387	98.3243	300.124	MM.1	Lymphoid
CELF2	59.5986	90.8126	313.045	HEL	Lymphoid
CEND1	26.3241	138.56	161.773	RAMOS	Lymphoid
CEND1	30.3391	133.541	186.448	RAJI	Lymphoid
CEND1	32.3744	176.76	198.955	KARPAS-422	Lymphoid
CEND1	70.2699	137.178	431.841	L-363	Lymphoid
CERKL	24.1793	99.5773	60.5756	NU-DUL-1	Lymphoid
CERKL	25.3239	70.9704	63.4432	HL-60	Lymphoid
CERKL	25.7957	140.841	64.6253	KARPAS-422	Lymphoid
CERKL	36.3299	103.443	91.0162	PL-21	Lymphoid
CERKL	39.6944	77.4897	99.4451	L-363	Lymphoid
CERKL	44.3455	82.6118	111.098	SIG-M5	Lymphoid
CES1	53.4821	152.281	3331.83	PL-21	Lymphoid
CES1	57.7091	107.507	3595.16	SIG-M5	Lymphoid
CES1	89.9847	160.139	5605.87	OCI-AML3	Lymphoid
CES1	97.9215	175.386	6100.31	U-937	Lymphoid
CES1	117.002	201.933	7288.98	OCI-AML2	Lymphoid
CES1	175.131	214.052	10910.3	THP-1	Lymphoid
CFD	84.9203	68.894	36.3391	SKM-1	Lymphoid
CFD	88.9947	249.408	38.0826	HL-60	Lymphoid
CFD	113.57	189.56	48.5988	MV-4-11	Lymphoid
CFD	133.941	238.365	57.3159	OCI-AML3	Lymphoid
CFD	272.126	506.947	116.448	SIG-M5	Lymphoid
CFD	776.551	949.131	332.302	THP-1	Lymphoid
CFH	70.9754	122.888	365.943	OCI-M1	Lymphoid
CFH	183.801	335.84	947.663	SCC-3	Lymphoid
CFI	37.1262	67.8365	346.774	SCC-3	Lymphoid
CFI	74.1449	228.842	692.545	SR-786	Lymphoid
CFP	55.9244	136.378	392.396	HNT-34	Lymphoid
CHI3L1	43.4685	77.3576	1463.4	OCI-AML3	Lymphoid
CHI3L1	99.5199	278.905	3350.42	HL-60	Lymphoid
CHI3L1	100.957	81.9044	3398.81	SKM-1	Lymphoid
CHI3L1	103.97	119.808	3500.23	U266B1	Lymphoid
CHI3L1	136.305	227.507	4588.83	MV-4-11	Lymphoid
CHI3L1	792.653	2256.95	26685.3	PL-21	Lymphoid
CHI3L1	1516.26	1853.24	51046.3	THP-1	Lymphoid
CHI3L2	39.2924	93.1994	802.437	Jiyoye	Lymphoid
CHI3L2	41.1807	68.0992	841.001	Pfeiffer	Lymphoid
CHI3L2	49.709	206.806	1015.17	EB-3	Lymphoid
CHI3L2	53.6328	92.9869	1095.3	EB2	Lymphoid
CHI3L2	64.6486	329.128	1320.26	HS-Sultan	Lymphoid
CHI3L2	182.197	266.106	3720.85	Jurkat, Clone E6-1	Lymphoid
CHI3L2	227.27	1301.78	4641.35	Farage	Lymphoid
CHI3L2	305.753	1345.81	6244.15	RAJI	Lymphoid
CHI3L2	455.969	549.038	9311.89	CCRF-SB	Lymphoid
CHN2	34.8981	112.858	57.1002	TMD8	Lymphoid
CHST2	40.5639	232.346	46.6583	Farage	Lymphoid
CHST2	50.1483	76.4128	57.6828	HEL	Lymphoid
CHST2	55.1159	100.707	63.3967	SCC-3	Lymphoid
CHST2	59.8346	89.917	68.8244	MOLP-8	Lymphoid
CHST2	132.896	301.459	152.863	NALM-6	Lymphoid
CIITA	14.0365	80.3997	199.658	Farage	Lymphoid
CIITA	16.4465	67.7314	233.938	NU-DUL-1	Lymphoid
CIITA	18.0917	79.6325	257.34	RAJI	Lymphoid
CIITA	29.5835	67.1069	420.802	NALM-6	Lymphoid
CIITA	35.4519	164.386	504.275	RC-K8	Lymphoid
CIITA	45.5735	79.0138	648.246	EB2	Lymphoid
CIITA	70.2938	116.242	999.873	Pfeiffer	Lymphoid
CIITA	77.1403	182.972	1097.26	Jiyoye	Lymphoid
CISH	39.9543	113.763	41.344	PL-21	Lymphoid
CISH	61.5249	105.618	63.6648	KG-1	Lymphoid
CISH	69.9779	109.794	72.4118	OCI-AML5	Lymphoid
CITED4	109.752	312.5	51.3013	PL-21	Lymphoid
CITED4	469.053	573.294	219.249	THP-1	Lymphoid
CLC	138.637	112.473	2591.66	SKM-1	Lymphoid
CLC	363.686	1019.23	6798.7	HL-60	Lymphoid
CLDN23	43.2465	139.855	35.5549	TMD8	Lymphoid
CLEC11A	48.7265	71.167	52.6865	Jurkat, Clone E6-1	Lymphoid
CLEC11A	80.1123	181.726	86.6231	NALM-6	Lymphoid
CLEC11A	83.2509	67.5397	90.0168	SKM-1	Lymphoid
CLEC11A	88.3581	247.624	95.539	HL-60	Lymphoid
CLEC11A	108.885	153.16	117.734	KU812	Lymphoid
CLEC11A	115.005	205.985	124.352	U-937	Lymphoid
CLEC11A	122.491	297.009	132.446	SUP-B15	Lymphoid
CLEC11A	128.629	239.625	139.083	SIG-M5	Lymphoid
CLEC11A	162.976	255.707	176.221	OCI-AML5	Lymphoid
CLEC11A	181.517	516.838	196.269	PL-21	Lymphoid
CLEC11A	198.579	340.893	214.718	KG-1	Lymphoid
CLEC11A	231.361	352.533	250.164	HEL	Lymphoid
CLEC11A	285.896	508.787	309.13	OCI-AML3	Lymphoid
CLEC11A	297.419	513.314	321.59	OCI-AML2	Lymphoid
CLEC11A	331.965	554.082	358.944	MV-4-11	Lymphoid
CLEC11A	655.408	1112.26	708.673	Kasumi-1	Lymphoid
CLEC11A	937.785	1146.2	1014	THP-1	Lymphoid
CLEC12A	34.0726	95.4887	3407.26	HL-60	Lymphoid
CLEC12A	51.6979	92.5957	5169.79	U-937	Lymphoid
CLEC12A	52.3061	90.275	5230.61	OCI-AML2	Lymphoid
CLEC12A	58.7284	92.1441	5872.84	OCI-AML5	Lymphoid
CLEC12A	67.6405	126.008	6764.05	SIG-M5	Lymphoid
CLEC12A	90.0229	256.325	9002.29	PL-21	Lymphoid
CLEC14A	28.6431	69.4521	2864.31	SUP-B15	Lymphoid
CLEC14A	35.5448	80.6293	3554.48	NALM-6	Lymphoid
CLEC17A	30.9127	90.7366	1753.19	GA-10	Lymphoid
CLEC17A	51.1061	165.273	2898.44	TMD8	Lymphoid
CLEC17A	61.6855	208.345	3498.44	WSU-NHL	Lymphoid
CLEC1B	51.8077	89.4147	5180.77	OCI-AML2	Lymphoid
CLEC2A	44.2254	64.8526	4422.54	UKE-1	Lymphoid
CLEC2A	51.1313	88.2472	5113.13	OCI-AML2	Lymphoid
CLEC2A	70.2091	125.751	7020.91	U-937	Lymphoid
CLEC2B	14.7985	65.1374	75.0548	RAJI	Lymphoid
CLEC2B	18.835	71.193	95.5269	NAMALWA	Lymphoid
CLEC2B	32.5855	92.7816	165.266	PL-21	Lymphoid
CLEC2B	42.5563	76.7876	215.836	KMS-28BM	Lymphoid
CLEC2B	76.2725	113.067	386.837	KMS-28PE	Lymphoid
CLEC2B	92.8654	169.683	470.992	SCC-3	Lymphoid
CLEC2B	131.805	193.28	668.486	UKE-1	Lymphoid
CLEC2B	186.062	333.254	943.661	U-937	Lymphoid
CLEC2D	22.5657	114.883	41.8748	HS-Sultan	Lymphoid
CLEC2D	23.2855	107.972	43.2106	RC-K8	Lymphoid
CLEC2D	23.4787	88.745	43.569	NAMALWA	Lymphoid
CLEC2D	23.6458	104.079	43.8791	RAJI	Lymphoid
CLEC2D	25.637	105.581	47.5741	NU-DUL-1	Lymphoid
CLEC2D	29.6268	113.465	54.978	Daudi	Lymphoid
CLEC2D	32.716	187.394	60.7106	Farage	Lymphoid
CLEC2D	39.6062	119.481	73.4966	CA46	Lymphoid
CLEC2D	40.0026	86.707	74.2321	AMO-1	Lymphoid
CLEC2D	42.8404	74.2753	79.4983	EB2	Lymphoid
CLEC2D	43.1314	227.028	80.0383	RAMOS	Lymphoid
CLEC2D	44.7784	186.293	83.0946	EB-3	Lymphoid
CLEC2D	46.2698	135.813	85.8621	GA-10	Lymphoid
CLEC2D	48.2913	74.6299	89.6134	MOLP-2	Lymphoid
CLEC4D	103.312	188.77	10331.2	SCC-3	Lymphoid
CLEC5A	26.3767	73.921	2637.67	HL-60	Lymphoid
CLEC5A	83.8697	142.332	8386.97	Kasumi-1	Lymphoid
CLEC7A	50.5978	86.7934	5059.78	KMS-34	Lymphoid
CLEC7A	84.8509	201.736	8485.09	JJN-3	Lymphoid
CLEC9A	91.1704	133.693	9117.04	UKE-1	Lymphoid
CLECL1	17.4691	76.8923	1746.91	RAJI	Lymphoid
CLECL1	28.0037	116.505	2800.37	EB-3	Lymphoid
CLECL1	39.0954	147.773	3909.54	NAMALWA	Lymphoid
CLECL1	40.1379	117.815	4013.79	GA-10	Lymphoid
CLECL1	55.3611	99.1569	5536.11	U-937	Lymphoid
CLECL1	57.8107	186.955	5781.07	TMD8	Lymphoid
CLECL1	61.6006	253.689	6160.06	NU-DUL-1	Lymphoid
CLECL1	63.0519	92.4599	6305.19	UKE-1	Lymphoid
CLECL1	65.4157	113.416	6541.57	EB2	Lymphoid
CLIC2	29.5595	137.064	220.37	RC-K8	Lymphoid
CMAHP	39.8107	72.7416	397.009	SCC-3	Lymphoid
CMPK2	96.7687	166.119	236.082	KG-1	Lymphoid
CMTM5	94.3258	143.728	9432.58	HEL	Lymphoid
CNR1	25.7661	107.196	2178.39	EB-3	Lymphoid
CNR1	103.197	471.905	8724.79	TK	Lymphoid
CNR2	23.0001	64.4579	2300.01	HL-60	Lymphoid
CNR2	40.5535	136.971	4055.35	WSU-NHL	Lymphoid
CNRIP1	64.7775	91.1179	1525.84	KU812	Lymphoid
CNRIP1	69.8876	82.6337	1646.2	SET-2	Lymphoid
CNRIP1	165.323	251.909	3894.19	HEL	Lymphoid
COCH	86.3854	146.601	43.3528	Kasumi-1	Lymphoid
COCH	94.162	169.505	47.2556	KMM-1	Lymphoid
COL23A1	36.8346	103.229	2237.81	HL-60	Lymphoid
COL2A1	77.0686	113.014	3583.85	UKE-1	Lymphoid
COL6A2	68.3106	162.411	40.8273	JJN-3	Lymphoid
COL6A3	69.7026	215.131	1230.95	SR-786	Lymphoid
COL6A3	108.367	262.762	1913.76	SUP-B15	Lymphoid
COL6A3	123.323	239.09	2177.88	A4/Fuk	Lymphoid
COL6A3	146.91	220.77	2594.41	MOLP-8	Lymphoid
COL6A3	149.198	272.613	2634.83	SCC-3	Lymphoid
COL9A2	45.2673	69.9566	62.7181	MOLP-2	Lymphoid
COL9A2	304.821	372.565	422.332	THP-1	Lymphoid
COL9A3	118.083	267.857	100.97	NALM-6	Lymphoid
CORO1A	129.458	293.661	32.0362	NALM-6	Lymphoid
CORO1A	140.867	323.093	34.8595	OPM-2	Lymphoid
CORO1A	142.581	345.723	35.2837	SUP-B15	Lymphoid
CORO1A	145.214	221.268	35.9352	HEL	Lymphoid
CORO1A	146.695	480.857	36.3018	KHM-1B	Lymphoid
CORO1A	149.052	656.067	36.8848	RAJI	Lymphoid
CORO1A	187.12	707.279	46.3054	NAMALWA	Lymphoid
CORO1A	188.529	874.186	46.6541	RC-K8	Lymphoid
CORO1A	192.949	327.446	47.7479	Kasumi-1	Lymphoid
CORO1A	201.199	650.662	49.7895	TMD8	Lymphoid
CORO1A	217.147	446.464	53.7359	KMS-12-BM	Lymphoid
CORO1A	222.935	383.627	55.1683	MM.1	Lymphoid
CORO1A	237.205	439.285	58.6997	KMS-27	Lymphoid
CORO1A	265.926	325.025	65.8071	THP-1	Lymphoid
CORO1A	281.601	448.832	69.686	RPMI 8226	Lymphoid
CORO1A	288.68	461.91	71.4378	KMS-21BM	Lymphoid
CORO1A	289.529	873.428	71.648	CA46	Lymphoid
CORO1A	292.311	426.932	72.3363	Jurkat, Clone E6-1	Lymphoid
CORO1A	299.601	463.007	74.1404	MOLP-2	Lymphoid
CORO1A	304.628	1267.35	75.3844	EB-3	Lymphoid
CORO1A	328.864	567.585	81.3819	OCI-AML2	Lymphoid
[truncated: 52,016 more rows]
