# Supplementary figures and images for: PAX8 regulon in human ovarian cancer links lineage dependency with epigenetic vulnerability to HDAC inhibitors
Source: eLife journal article supplement (doi:10.7554/elife.44306), 2019-05-03

Figure 2-figure supplement 1.

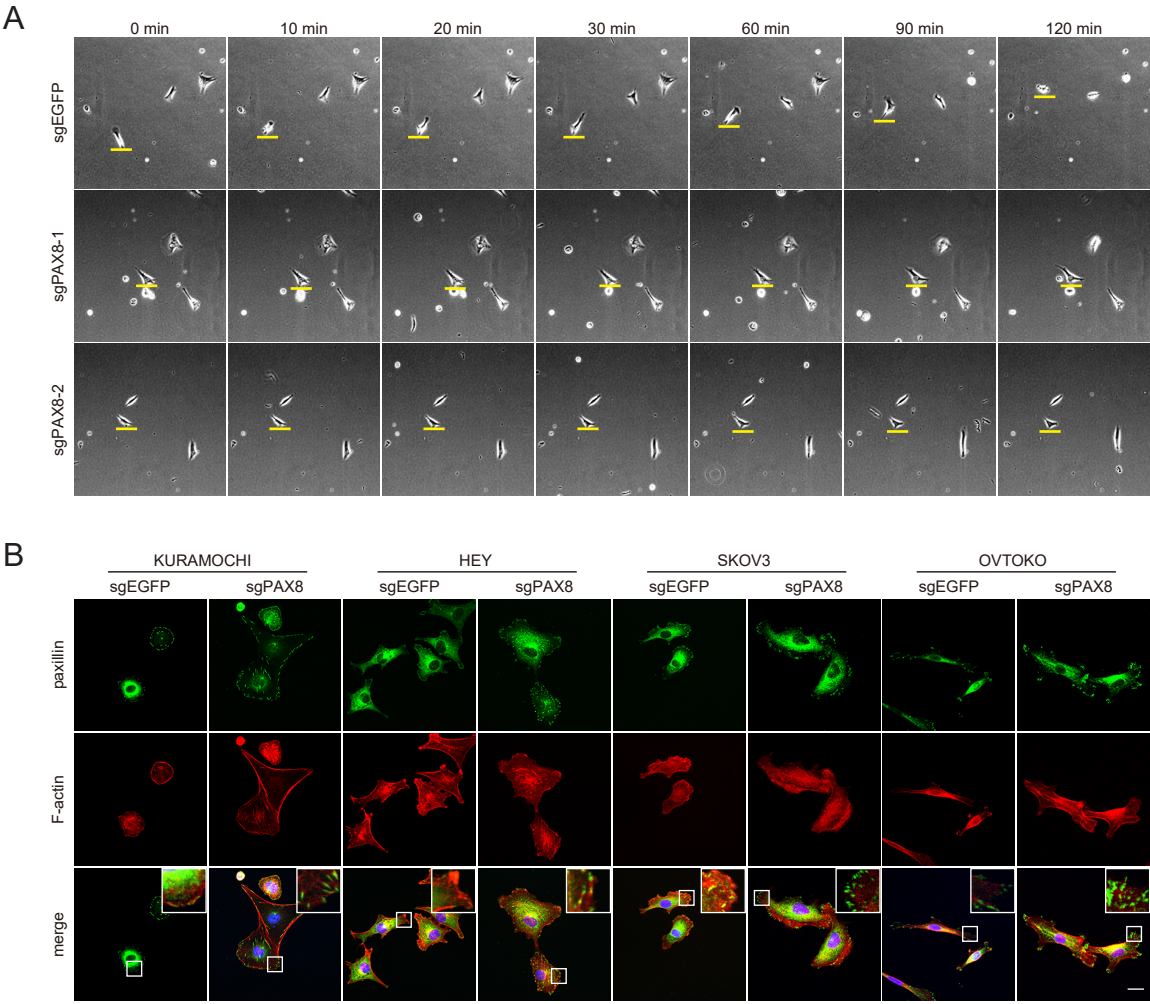

Supplement: supp [file elife-44306-supp-v1.zip]

Figure 1-figure supplement 1.

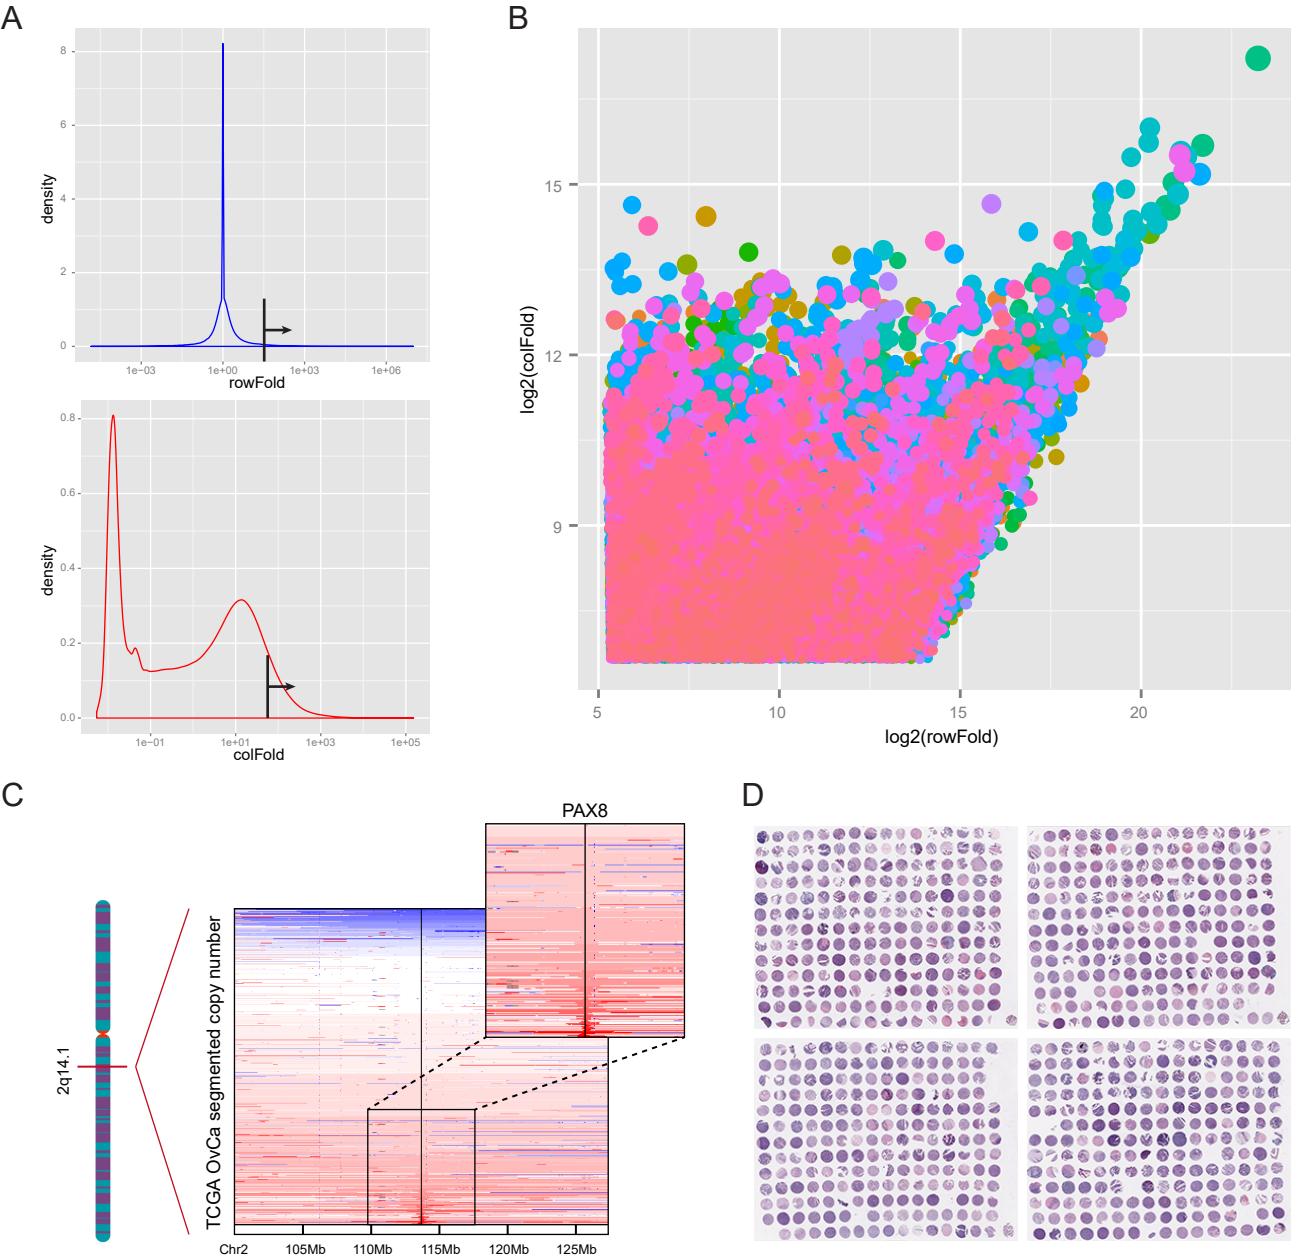

Supplement: supp [file elife-44306-supp-v1.zip]

Figure 1-figure supplement 3.

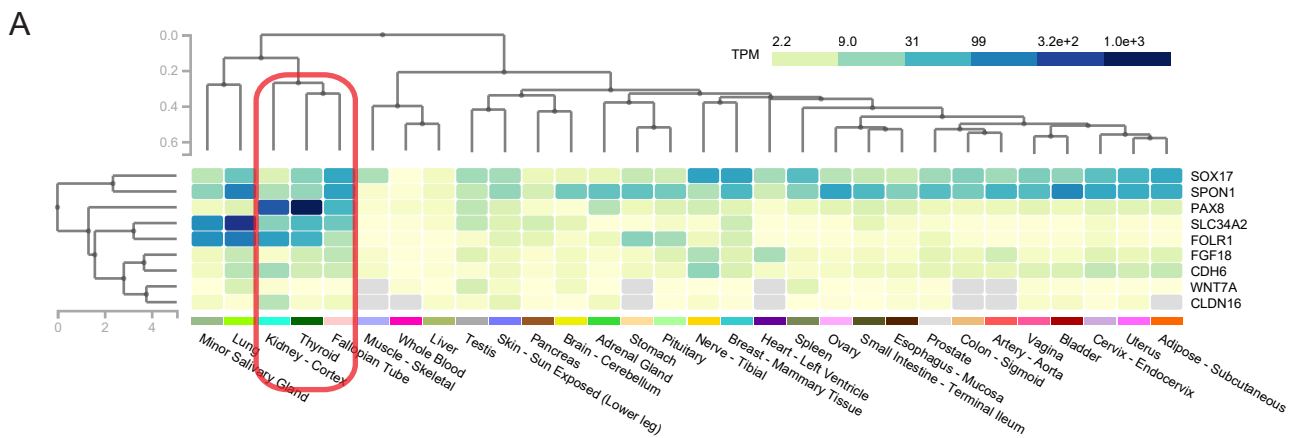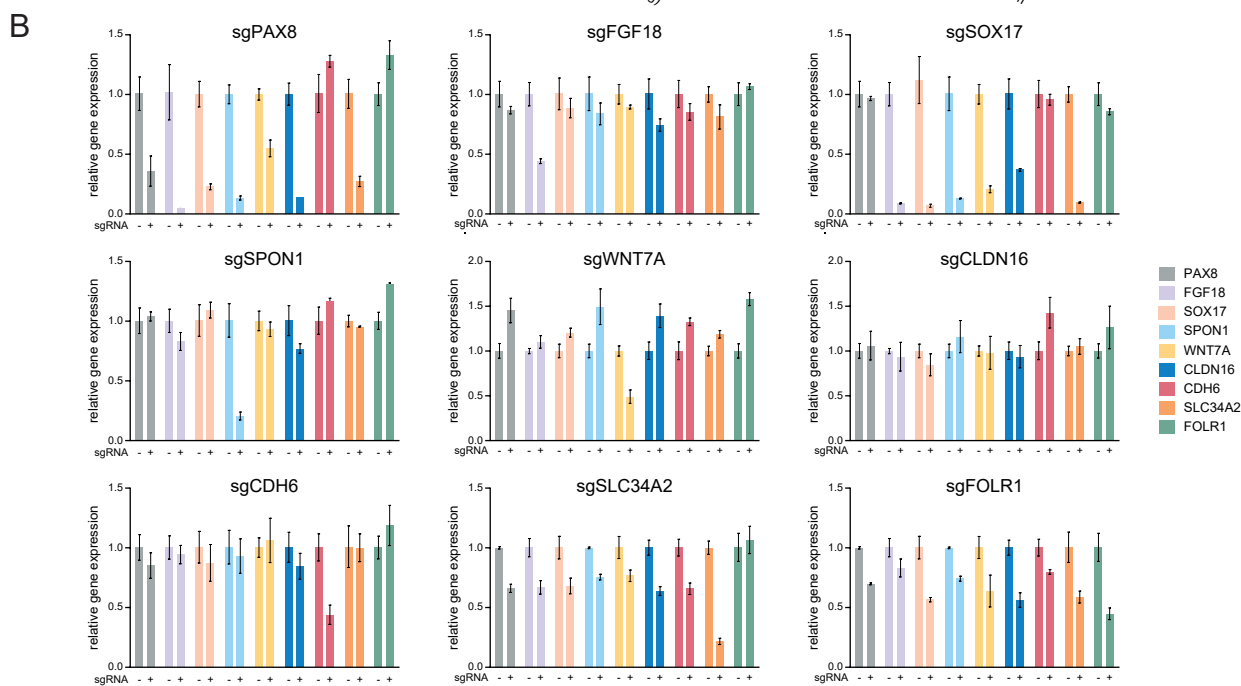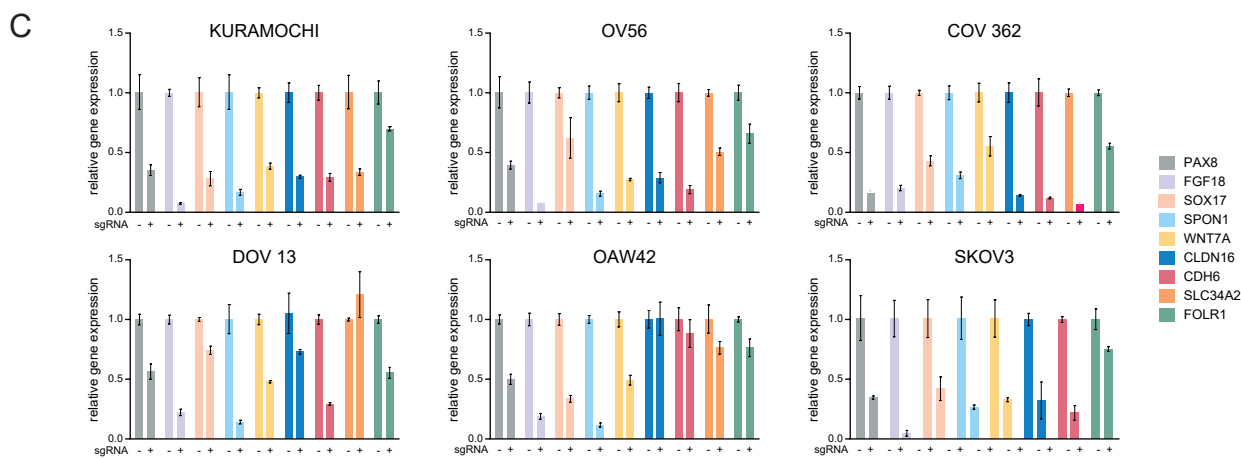

Supplement: supp [file elife-44306-supp-v1.zip]

Figure 4-figure supplement 2.

A

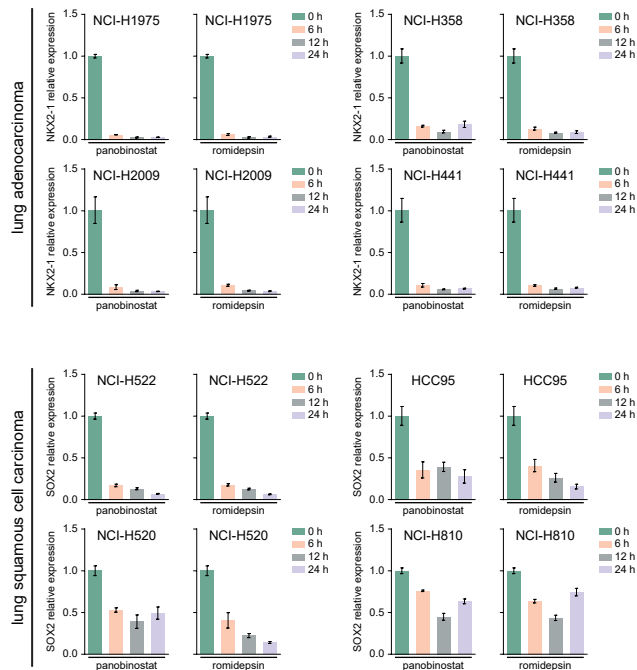

B

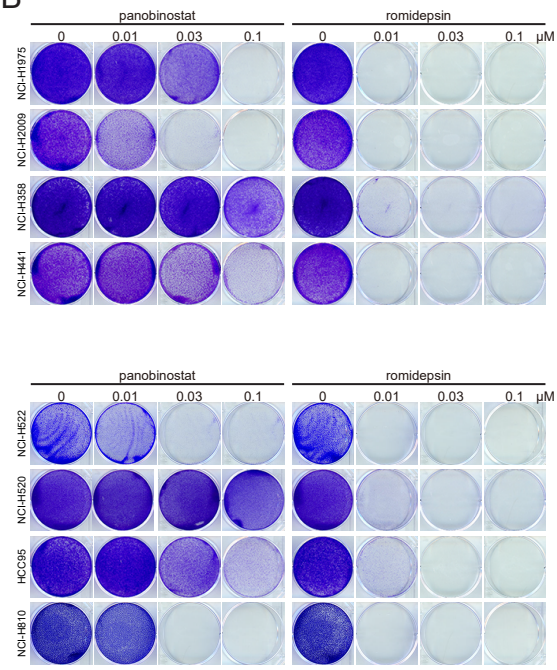

Supplement: supp [file elife-44306-supp-v1.zip]

Figure 1-figure supplement 2.

A

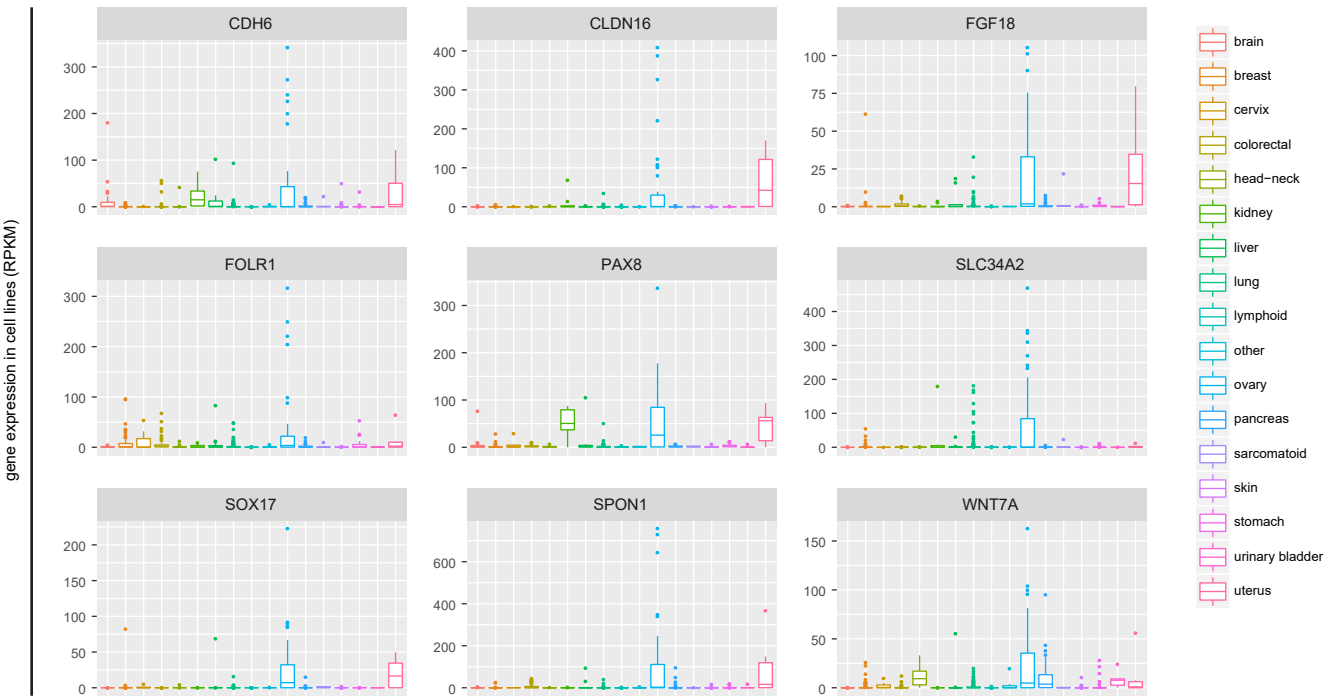

B

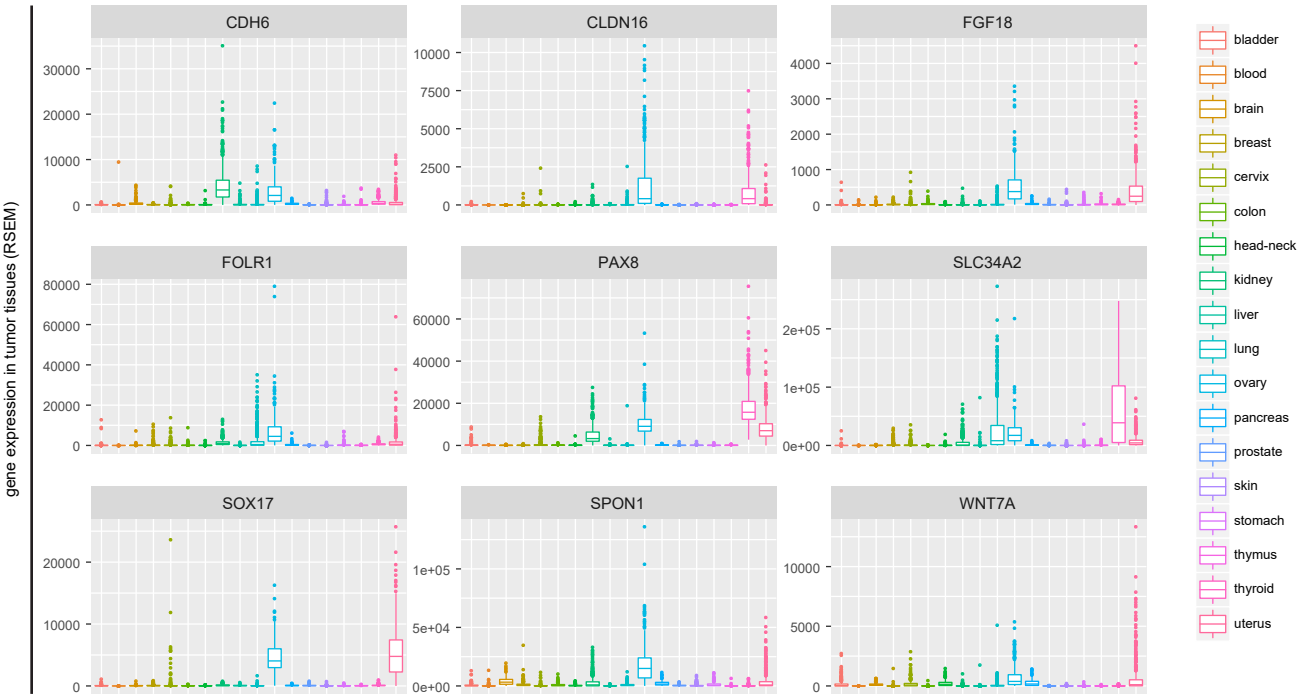

Supplement: supp [file elife-44306-supp-v1.zip › elife_poa_e44306_Figure_1_figure_supplement_2.pdf]

Figure 2-figure supplement 2.

A

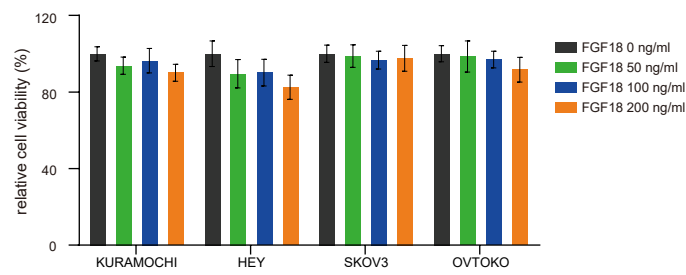

B

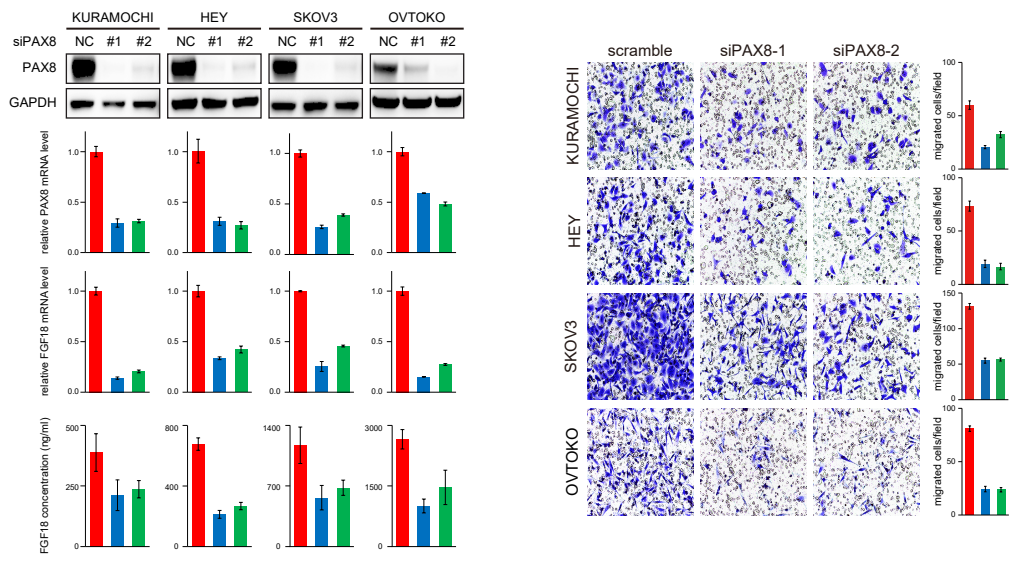

Supplement: supp [file elife-44306-supp-v1.zip › elife_poa_e44306_Figure_2_figure_supplement_2.pdf]

Figure 1-figure supplement 4.

A

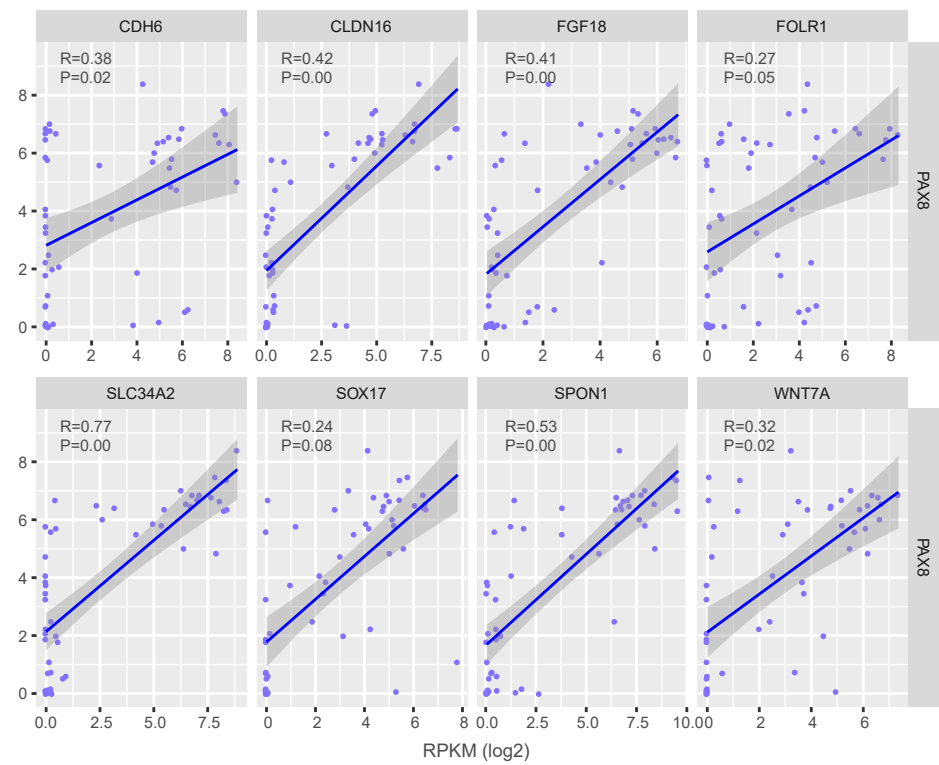

B

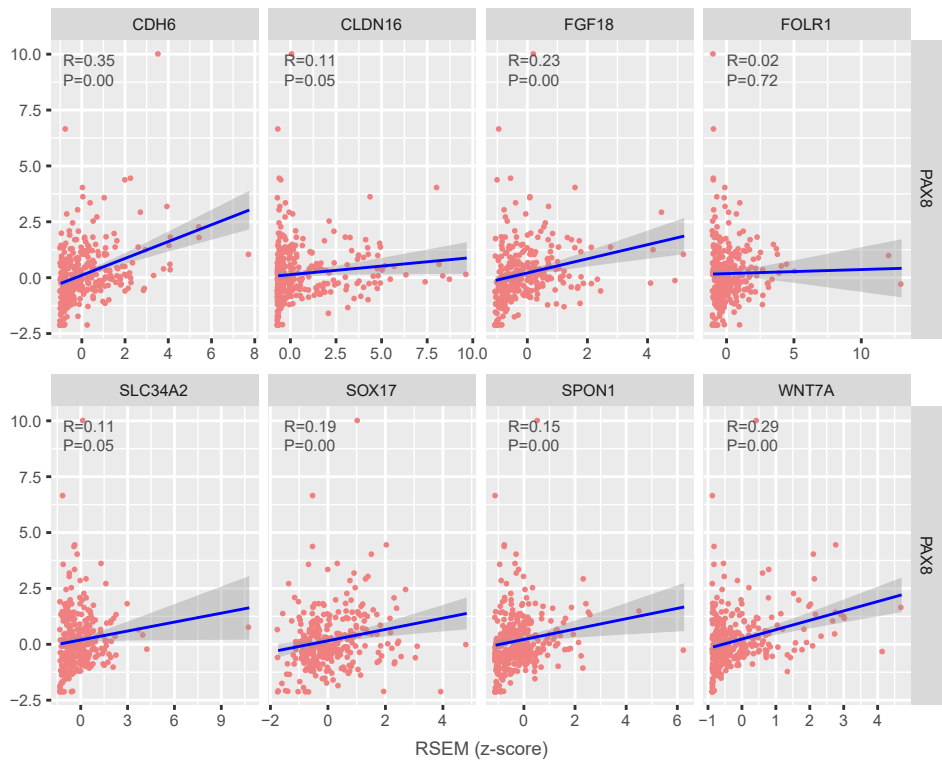

Supplement: supp [file elife-44306-supp-v1.zip › elife_poa_e44306_Figure_1_figure_supplement_4.pdf]

Figure 1-figure supplement 5.

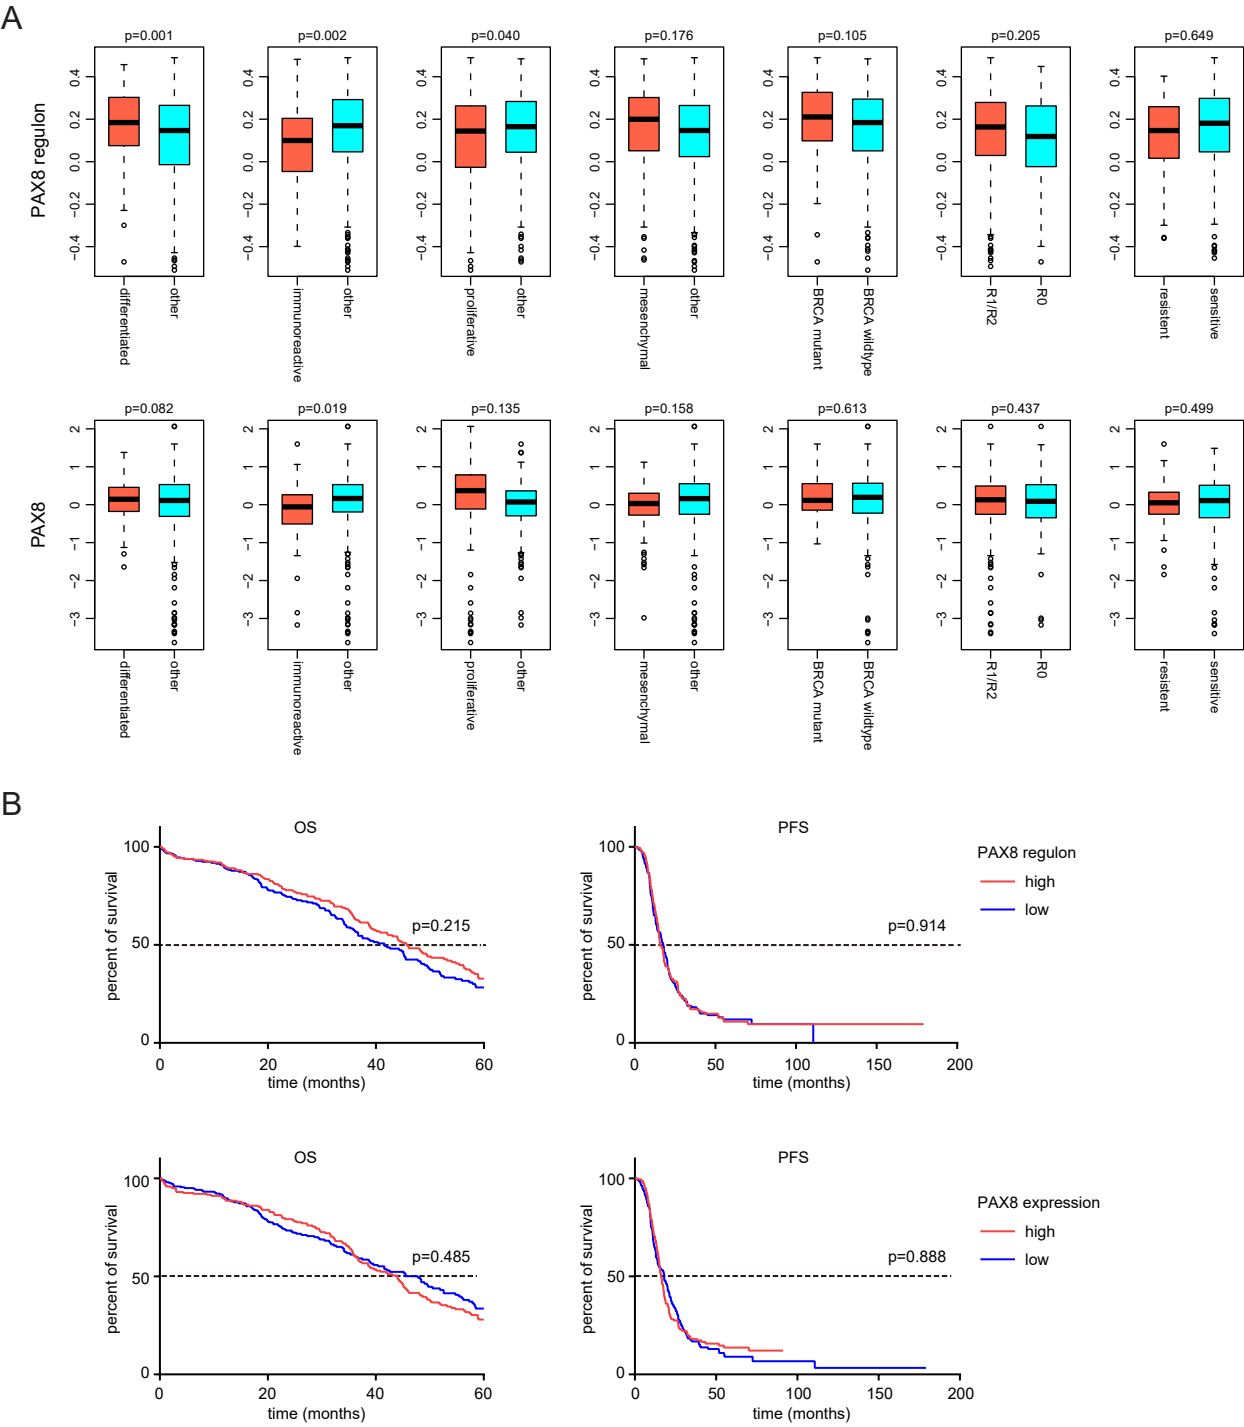

Supplement: supp [file elife-44306-supp-v1.zip › elife_poa_e44306_Figure_1_figure_supplement_5.pdf]

Figure 4-figure supplement 1.

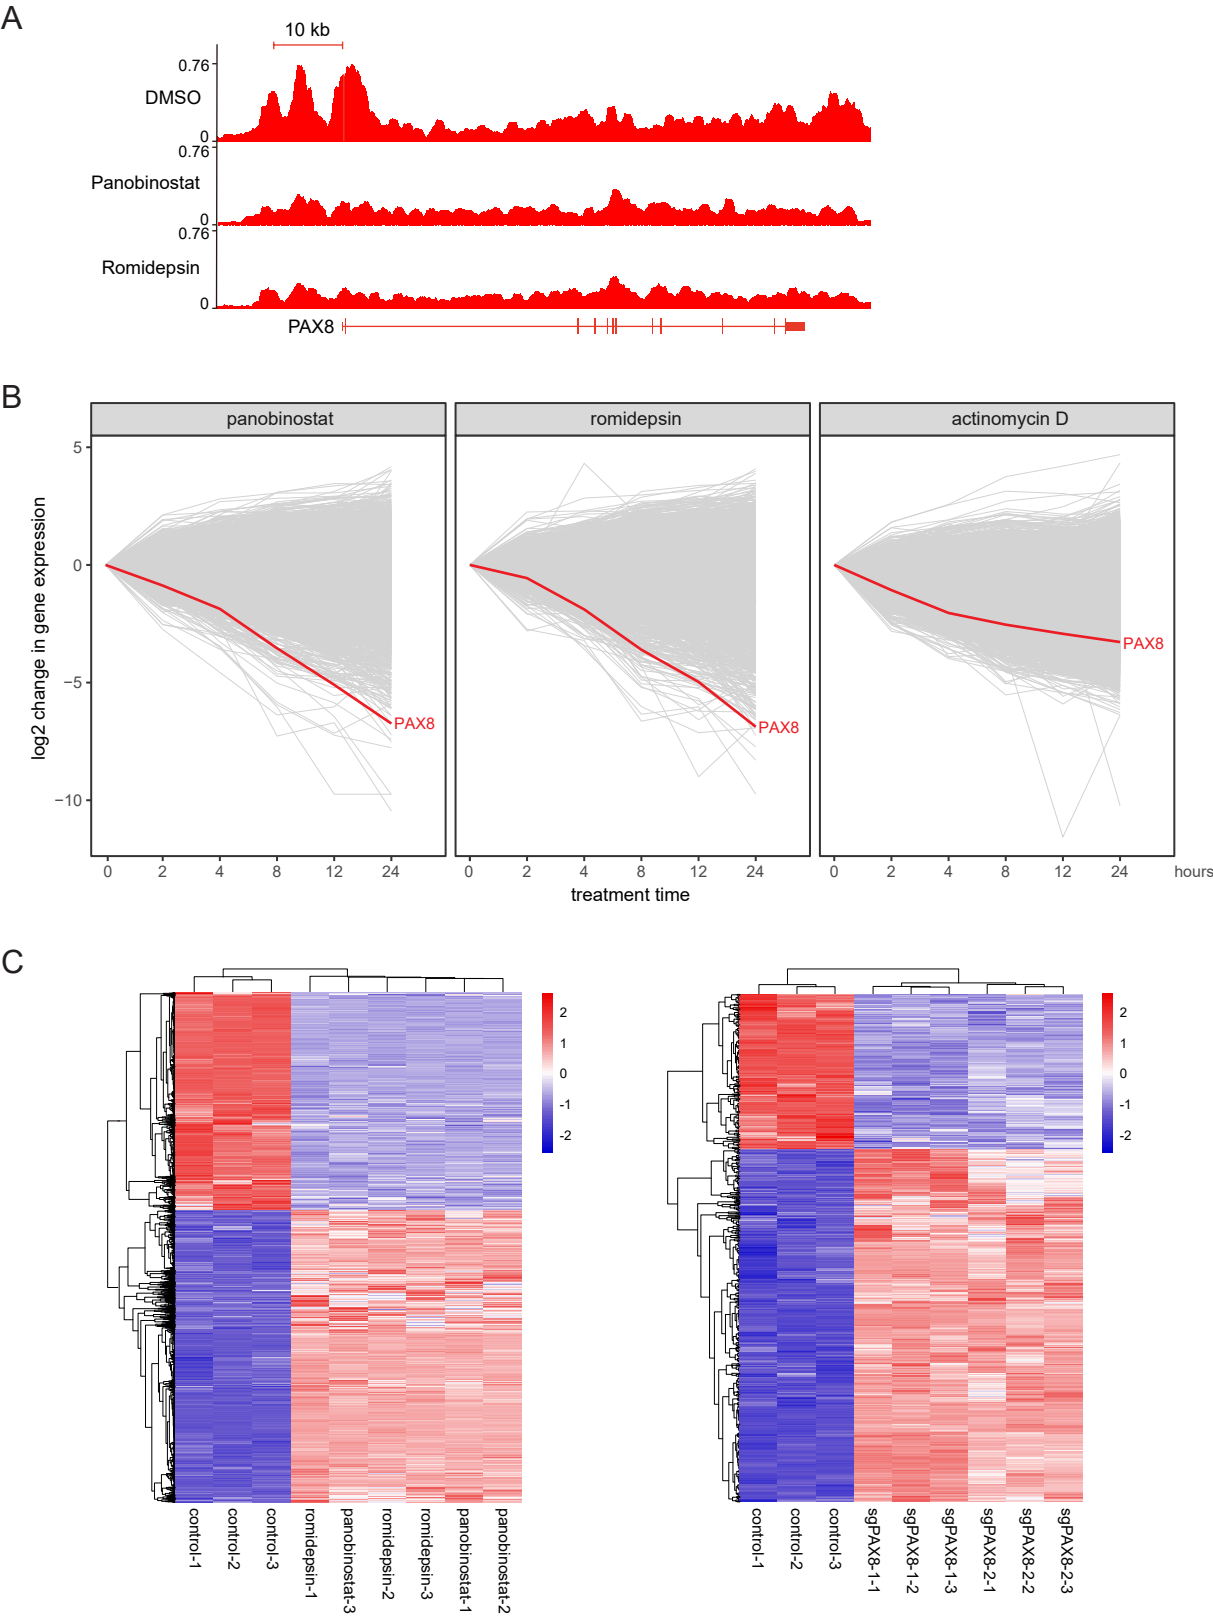

Supplement: supp [file elife-44306-supp-v1.zip › elife_poa_e44306_Figure_4_figure_supplement_1.pdf]

Figure 3-figure supplement 1.

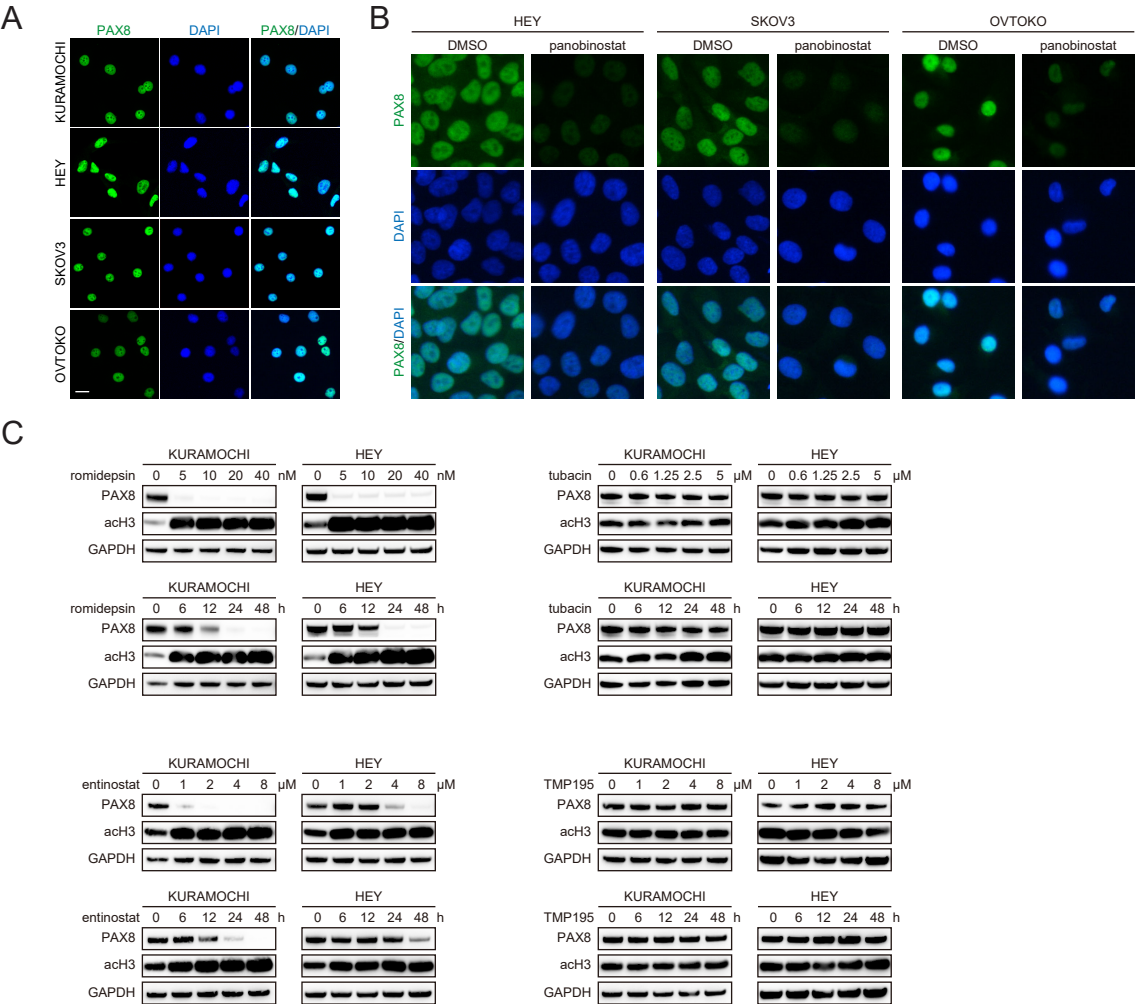

Supplement: supp [file elife-44306-supp-v1.zip › elife_poa_e44306_Figure_3_figure_supplement_1.pdf]

Figure 6-figure supplement 1.

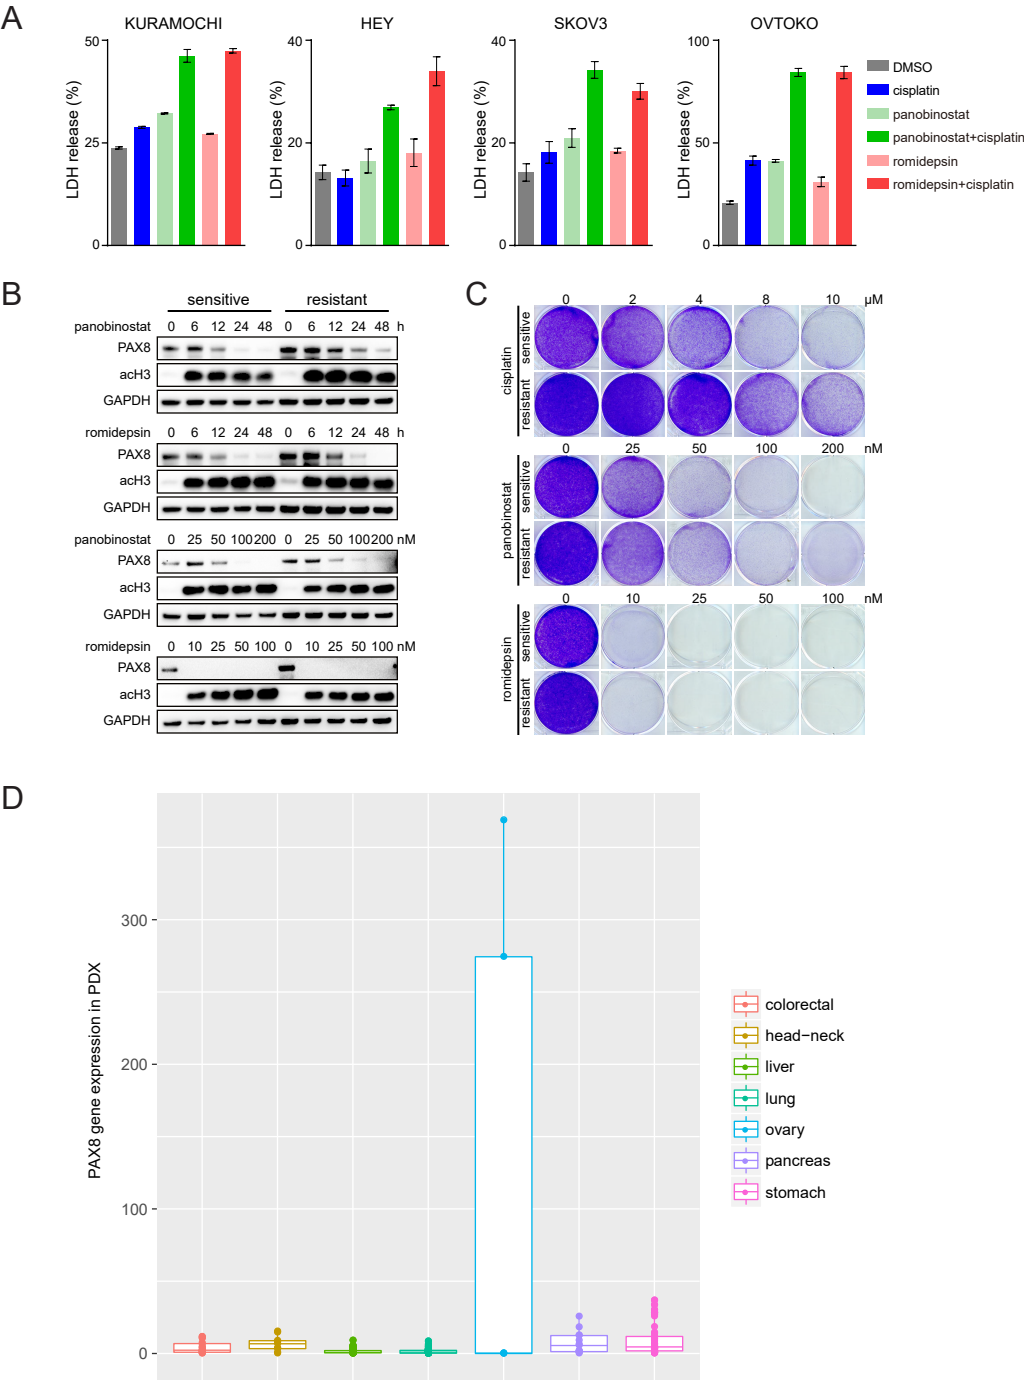

Supplement: supp [file elife-44306-supp-v1.zip › elife_poa_e44306_Figure_6_figure_supplement_1.pdf]

Figure 3-figure supplement 2.

A

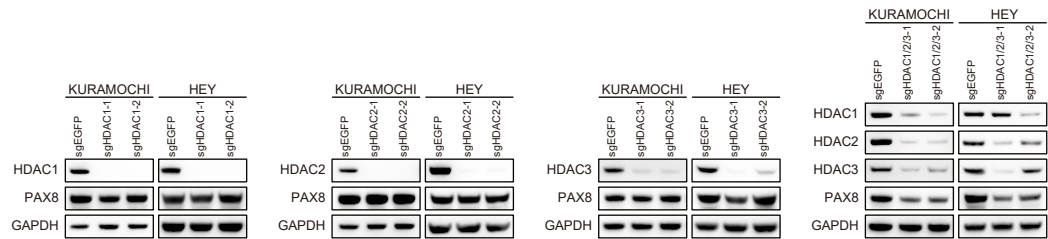

B

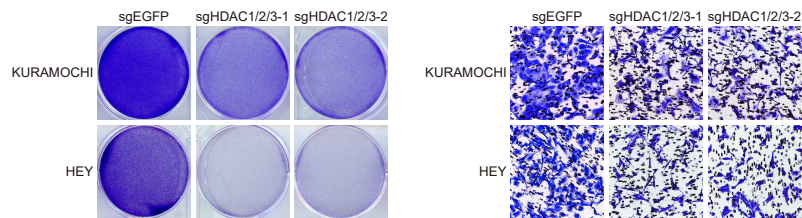

C

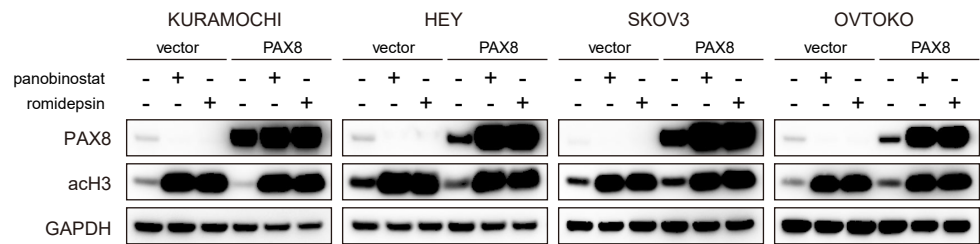

D

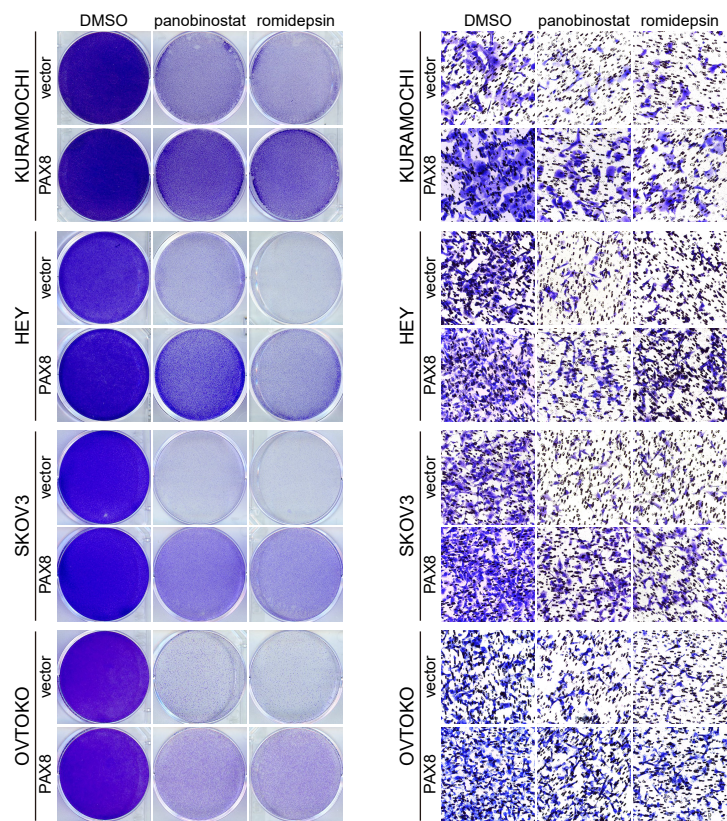

Supplement: supp [file elife-44306-supp-v1.zip › elife_poa_e44306_Figure_3_figure_supplement_2.pdf]
